# Supplementary material for: Photocatalytic CO2 reduction with aminoanthraquinone organic dyes
Source: PubMed Central journal article supplement (PMC9968311; doi:10.1038/s41467-023-36784-7), 2023-02-25
Supplement: 41467_2023_36784_MOESM1_ESM.pdf [file 41467_2023_36784_MOESM1_ESM.pdf]

## Supplementary Information

### Photocatalytic CO<sub>2</sub> reduction with aminoanthraquinone organic dyes

Qinqin Lei<sup>1,2</sup>, Huiqing Yuan<sup>1,2</sup>, Jiehao Du<sup>1</sup>, Mei Ming<sup>1</sup>, Shuang Yang<sup>1</sup>, Ya Chen<sup>1</sup>, Jingxiang Lei<sup>1</sup>, and Zhiji Han\*<sup>1</sup>

<sup>1</sup> MOE Key Laboratory of Bioinorganic and Synthetic Chemistry, School of Chemistry, Sun Yat-sen University, Guangzhou, 510275, China.

<sup>2</sup> These authors contributed equally: Qinqin Lei, Huiqing Yuan.

\* email: hanzhiji@mail.sysu.edu.cn.

# Table of Contents

|                                   |                                                                        |               |
|-----------------------------------|------------------------------------------------------------------------|---------------|
| <b>Supplementary Figure 1-6</b>   | UV-vis absorption spectra of <b>1-6</b>                                | <b>S3-5</b>   |
| <b>Supplementary Figure 7</b>     | UV-vis absorption and emission spectra of <b>1-6</b>                   | <b>S6</b>     |
| <b>Supplementary Figure 8-9</b>   | Cyclic voltammograms of <b>1-6</b>                                     | <b>S7-8</b>   |
| <b>Supplementary Figure 10</b>    | Square wave voltammetry of <b>1-6</b>                                  | <b>S9</b>     |
| <b>Supplementary Figure 11</b>    | Photocatalytic CO <sub>2</sub> reduction by varying [BIH]              | <b>S10</b>    |
| <b>Supplementary Figure 12</b>    | Photocatalytic CO <sub>2</sub> reduction by varying [FeTDHPP]          | <b>S10</b>    |
| <b>Supplementary Figure 13</b>    | Photocatalytic CO <sub>2</sub> reduction by varying [ <b>5</b> ]       | <b>S11</b>    |
| <b>Supplementary Figure 14</b>    | Stability tests of photocatalytic systems                              | <b>S12</b>    |
| <b>Supplementary Figure 15</b>    | Dynamic light scattering (DLS) measurements                            | <b>S13</b>    |
| <b>Supplementary Figure 16</b>    | Mercury poisoning experiments                                          | <b>S13</b>    |
| <b>Supplementary Figure 17</b>    | GC/MS chromatograms of CO                                              | <b>S14</b>    |
| <b>Supplementary Figure 18-19</b> | Fluorescence emission quenching of <b>4-5</b>                          | <b>S15</b>    |
| <b>Supplementary Figure 20</b>    | Fluorescence lifetime quenching of <b>1-6</b>                          | <b>S16</b>    |
| <b>Supplementary Figure 21</b>    | UV-vis absorption spectra of <b>1-6</b> with addition of FeTDHPP       | <b>S17</b>    |
| <b>Supplementary Figure 22</b>    | UV-vis absorption spectra of <b>1-6</b> with addition of BIH           | <b>S18</b>    |
| <b>Supplementary Figure 23-28</b> | <sup>1</sup> H NMR spectra of <b>1-6</b> with addition of BIH          | <b>S19-21</b> |
| <b>Supplementary Figure 29</b>    | UV-vis absorption spectra of <b>5</b> with addition of FeTDHPP         | <b>S22</b>    |
| <b>Supplementary Figure 30-36</b> | The change of UV-vis spectra of <b>1-6</b> during photolysis           | <b>S22-24</b> |
| <b>Supplementary Figure 37</b>    | UV-vis spectrum of AQ upon reduction by NaBH <sub>4</sub>              | <b>S25</b>    |
| <b>Supplementary Figure 38</b>    | <sup>1</sup> H NMR studying the reduction of AQ by NaBH <sub>4</sub>   | <b>S25</b>    |
| <b>Supplementary Figure 39-40</b> | Absorption, emission, and emission lifetime of AQH <sub>2</sub>        | <b>S26</b>    |
| <b>Supplementary Figure 41</b>    | Luminescence lifetime quenching of AQH <sub>2</sub>                    | <b>S27</b>    |
| <b>Supplementary Figure 42-43</b> | UV-vis spectra of photolyzed <b>5</b> with addition of FeTDHPP         | <b>S27-28</b> |
| <b>Supplementary Figure 44</b>    | SWVs of systems before and after irradiation                           | <b>S28</b>    |
| <b>Supplementary Figure 45</b>    | UV-vis studying the change of FeTDHPP during photolysis                | <b>S29</b>    |
| <b>Supplementary Figure 46</b>    | Photocatalytic CO <sub>2</sub> reduction with low [BIH]                | <b>S29</b>    |
| <b>Supplementary Figure 47-50</b> | UV-vis spectral change at >550 nm and 400 nm                           | <b>S30-31</b> |
| <b>Supplementary Figure 51</b>    | UV-vis studying a mixture of FeTDHPP and BIH during photolysis         | <b>S32</b>    |
| <b>Supplementary Figure 52-72</b> | <sup>1</sup> H NMR, <sup>13</sup> C NMR, FT-IR and HRMS spectra of PSs | <b>S33-44</b> |
| <b>Supplementary Figure 73</b>    | Emission delay of <b>6</b> under N <sub>2</sub> and CO <sub>2</sub>    | <b>S45</b>    |
| <b>Supplementary Figure 74</b>    | Emission delay of the picosecond pulsed diode laser                    | <b>S45</b>    |
| <b>Supplementary Figure 75-76</b> | Fluorescence quantum yield experiments                                 | <b>S46-47</b> |
| <b>Supplementary Table 1</b>      | Thermodynamic driving force of PSs                                     | <b>S48</b>    |
| <b>Supplementary Table 2-3</b>    | Data for photocatalytic CO <sub>2</sub> reduction                      | <b>S48</b>    |
| <b>Supplementary Table 4</b>      | Summary of systems with organic photosensitizers                       | <b>S49-50</b> |
| <b>Supplementary Table 5</b>      | Data for photocatalytic CO <sub>2</sub> reduction with <b>5</b>        | <b>S51</b>    |
| <b>Reference</b>                  |                                                                        | <b>S52</b>    |

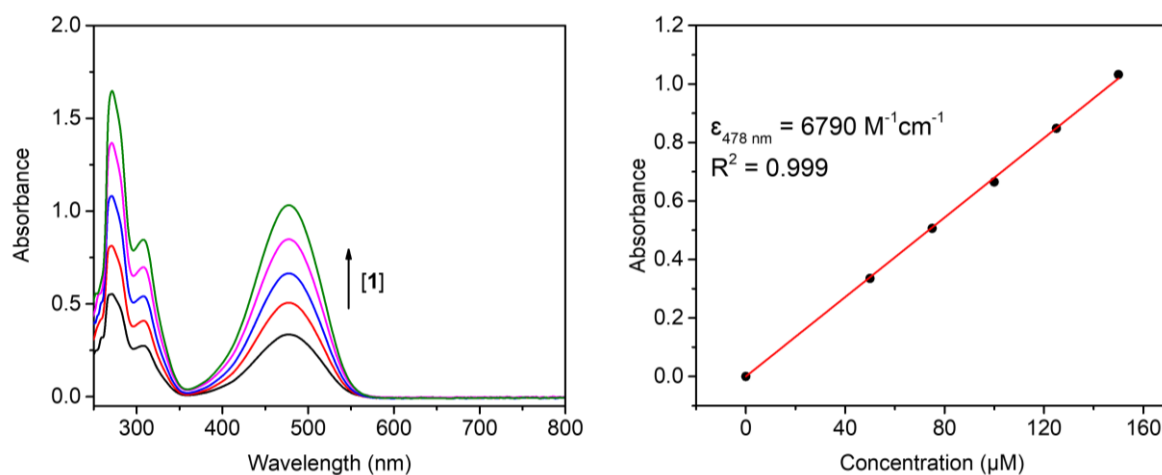

**Supplementary Figure 1. UV-vis spectra.** UV-vis spectra of PS 1 at different concentrations (50 to 150  $\mu\text{M}$ ) in DMF in a quartz cuvette (10-mm path length) at 298 K (left); a linear plot of absorbance at 478 nm (right). Source data are provided as a Source Data file.

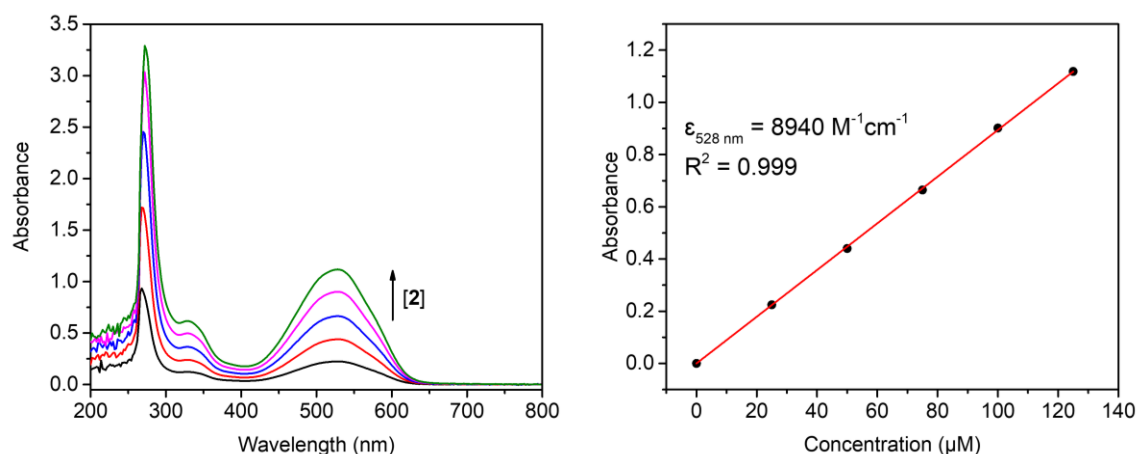

**Supplementary Figure 2. UV-vis spectra.** UV-vis spectra of PS 2 at different concentrations (25 to 125  $\mu\text{M}$ ) in DMF in a quartz cuvette (10-mm path length) at 298 K (left); a linear plot of absorbance at 528 nm (right). Source data are provided as a Source Data file.

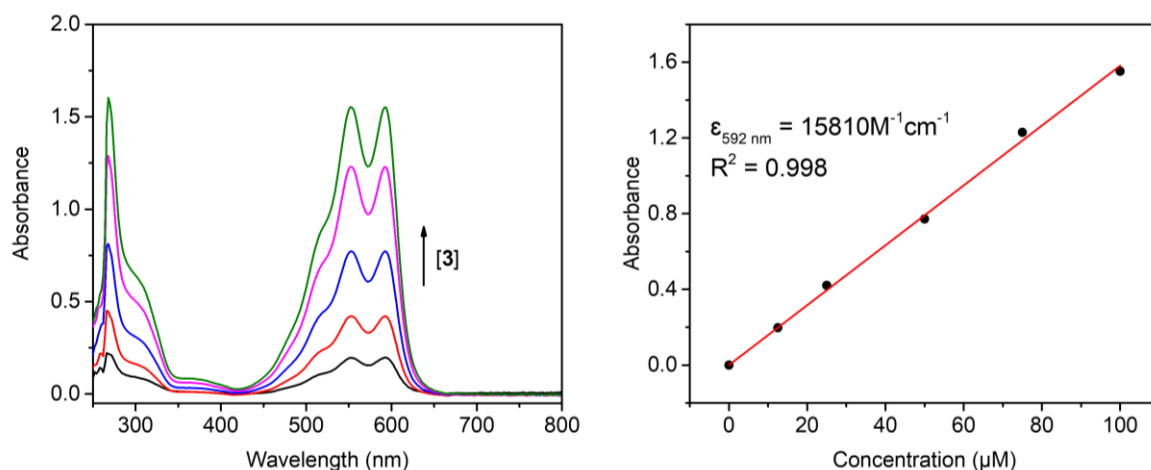

**Supplementary Figure 3. UV-vis spectra.** UV-vis spectra of PS 3 at different concentrations (12.5 to 100 μM) in DMF in a quartz cuvette (10-mm path length) at 298 K (left); a linear plot of absorbance at 592 nm (right). Source data are provided as a Source Data file.

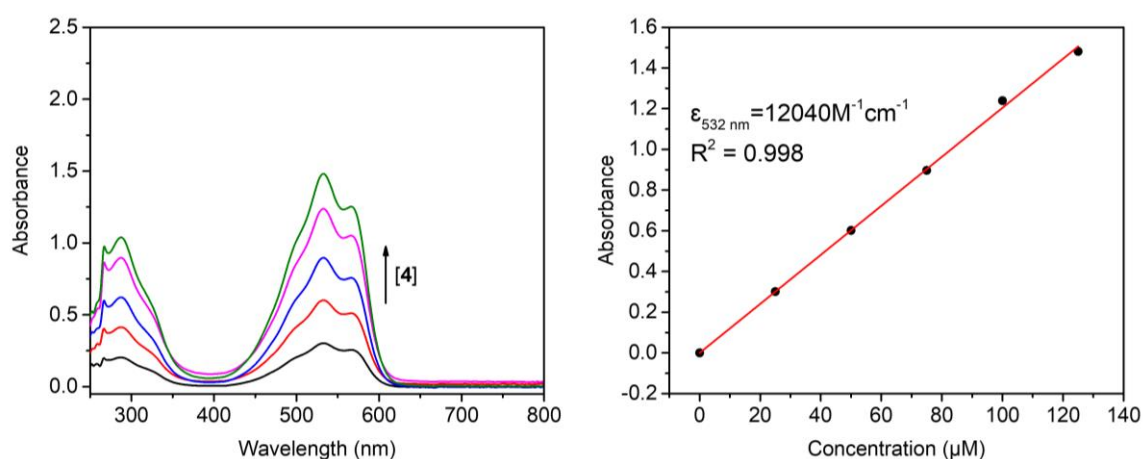

**Supplementary Figure 4. UV-vis spectra.** UV-vis spectra of PS 4 at different concentrations (25 to 125 μM) in DMF in a quartz cuvette (10-mm path length) at 298 K (left); a linear plot of absorbance at 532 nm (right). Source data are provided as a Source Data file.

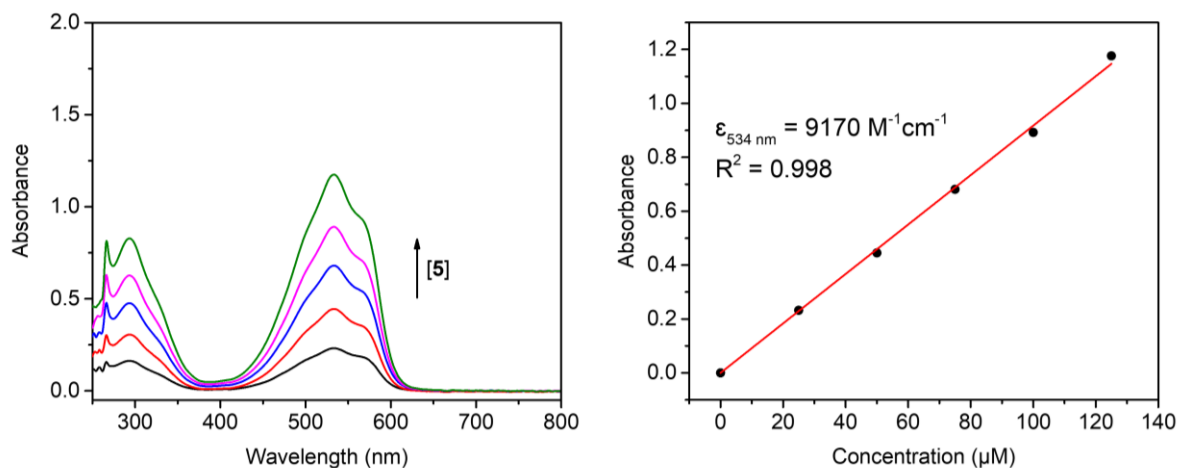

**Supplementary Figure 5. UV-vis spectra.** UV-vis spectra of PS 5 at different concentrations (25 to 125  $\mu\text{M}$ ) in DMF in a quartz cuvette (10-mm path length) at 298 K (left); a linear plot of absorbance at 534 nm (right). Source data are provided as a Source Data file.

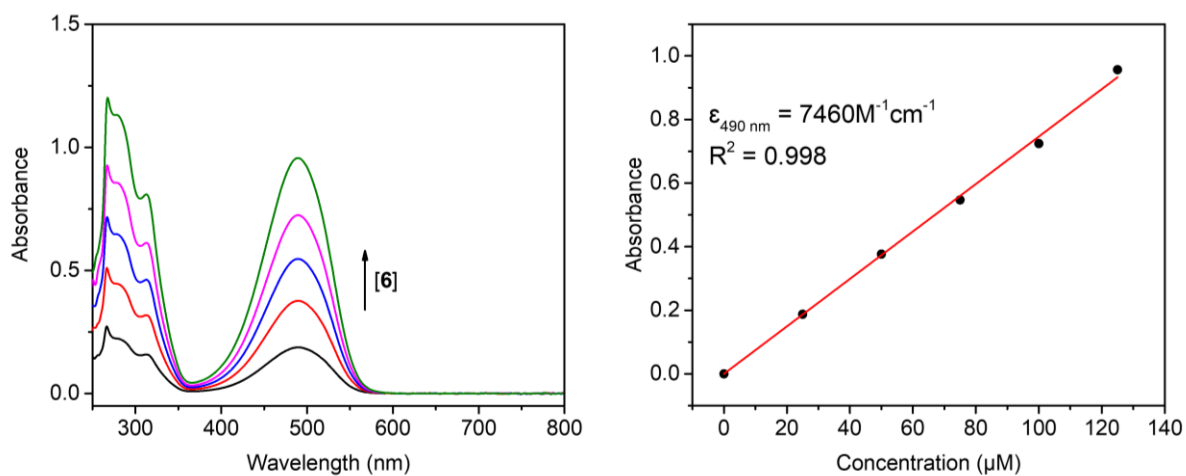

**Supplementary Figure 6. UV-vis spectra.** UV-vis spectra of PS 6 at different concentrations (25 to 125  $\mu\text{M}$ ) in DMF in a quartz cuvette (10-mm path length) at 298 K (left); a linear plot of absorbance at 490 nm (right). Source data are provided as a Source Data file.

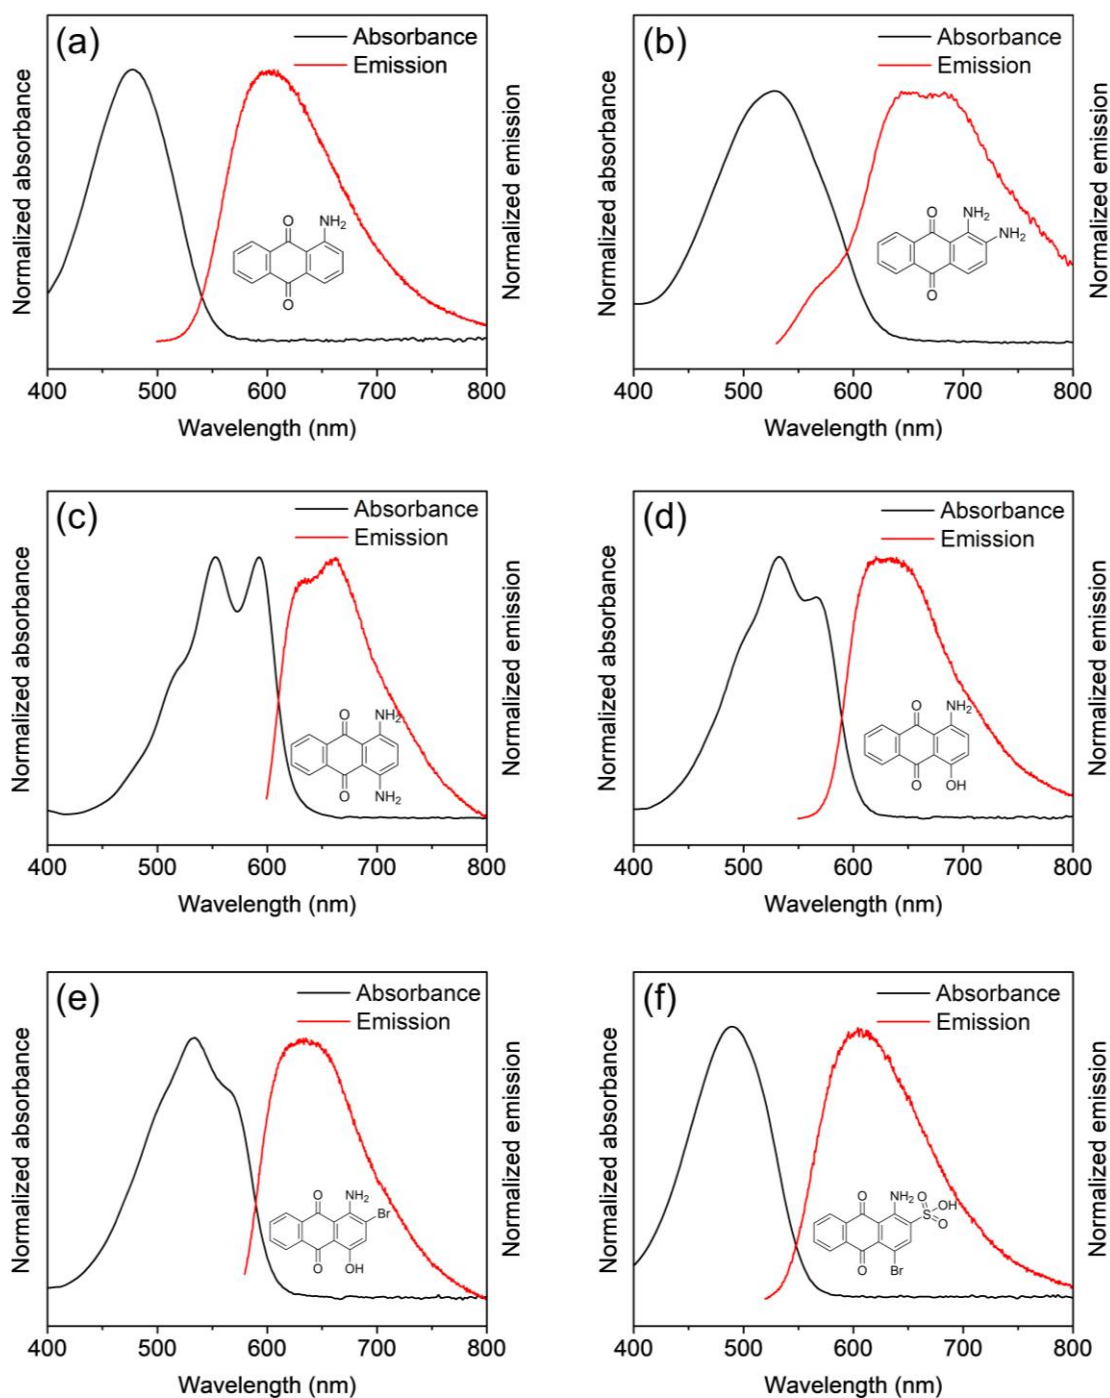

**Supplementary Figure 7. UV-vis and emission spectra.** Normalized absorption and emission spectra of (a) **1** ( $\lambda_{\text{exc}} = 470$  nm); (b) **2** ( $\lambda_{\text{exc}} = 502$  nm); (c) **3** ( $\lambda_{\text{exc}} = 540$  nm); (d) **4** ( $\lambda_{\text{exc}} = 530$  nm); (e) **5** ( $\lambda_{\text{exc}} = 530$  nm); and (f) **6** ( $\lambda_{\text{exc}} = 490$  nm) in DMF in a quartz cuvette (10-mm path length) at 298 K. Source data are provided as a Source Data file.

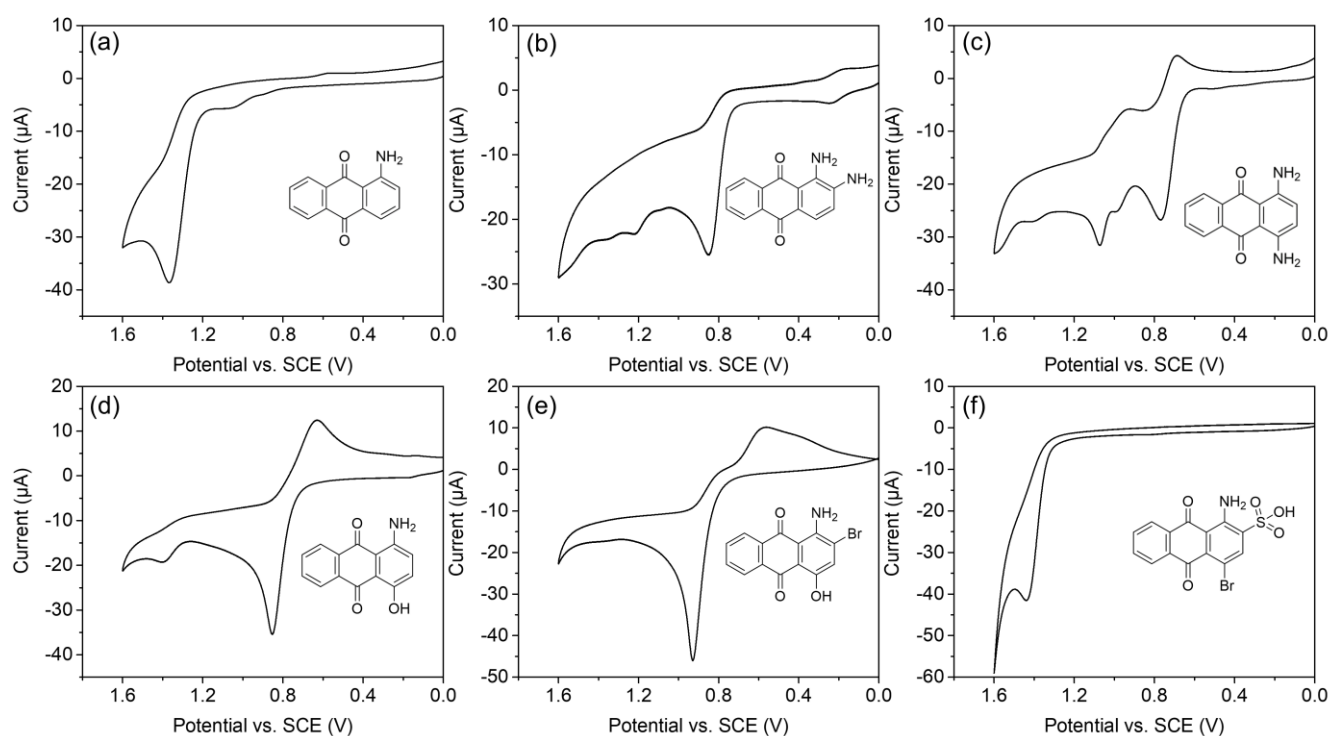

**Supplementary Figure 8. Electrochemical study.** Oxidative scans of cyclic voltammetry for 1.0 mM (a) **1**; (b) **2**; (c) **3**; (d) **4**; (e) **5**; and (f) **6** in 5 mL DMF containing 0.1 M TBAPF<sub>6</sub> under N<sub>2</sub>. Experiments were conducted using a glassy carbon working electrode (3.0 mm in diameter), a Pt wire counter electrode, and a KCl-saturated calomel electrode at a scan rate of 100 mV·s<sup>-1</sup>. Source data are provided as a Source Data file.

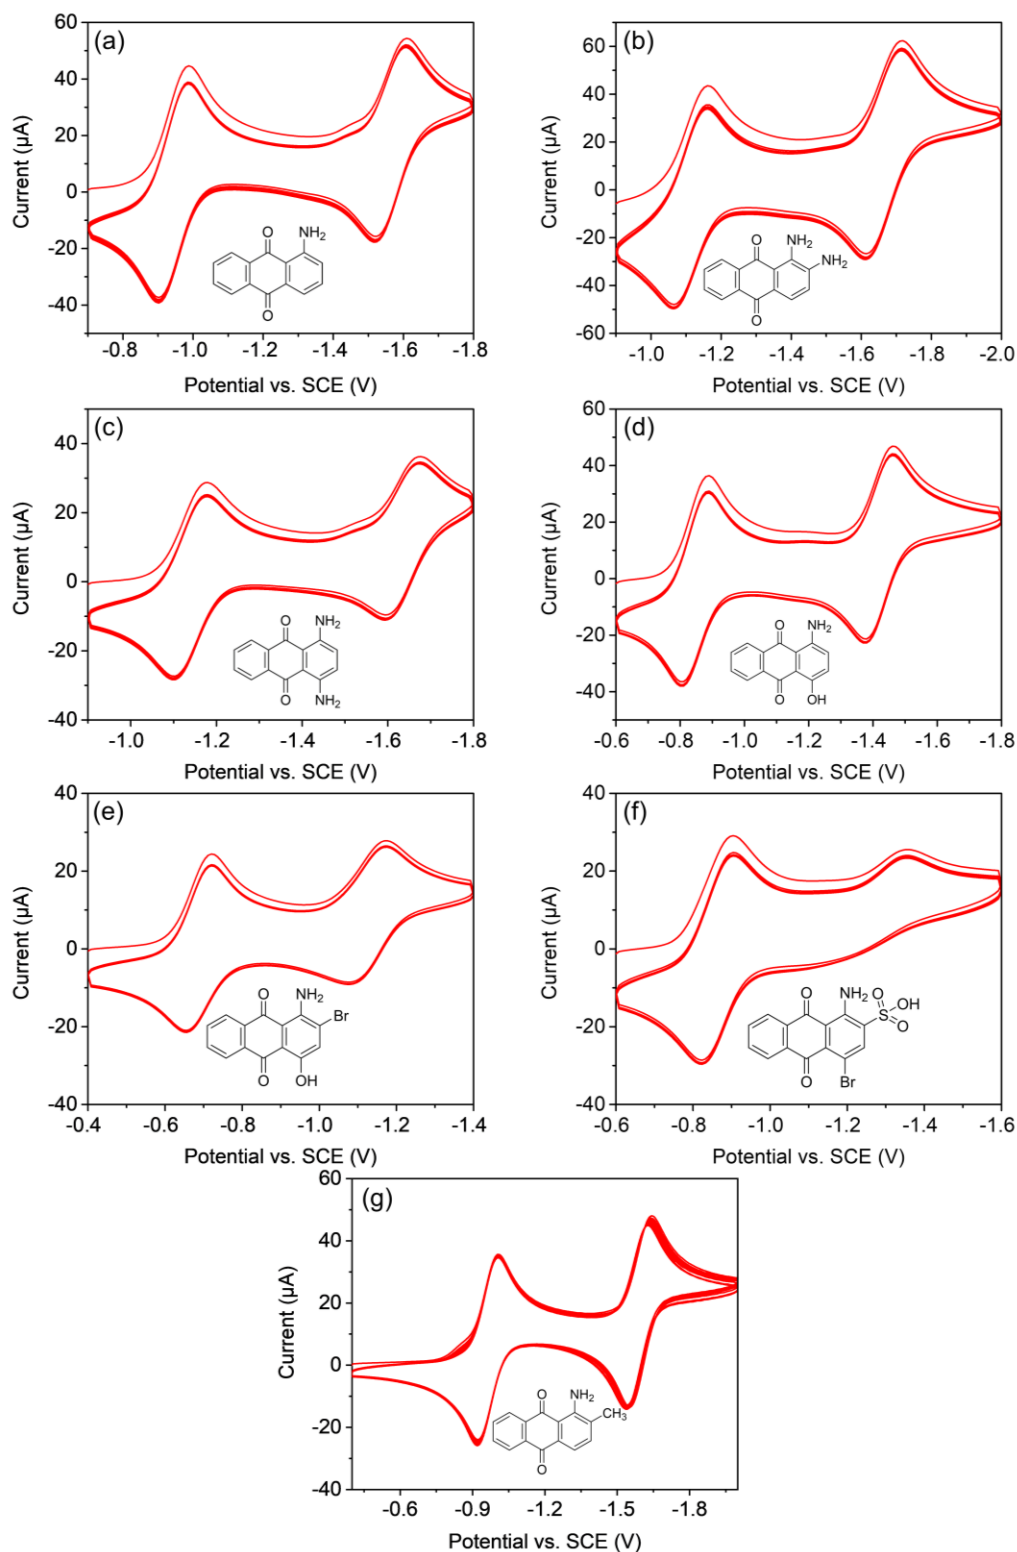

**Supplementary Figure 9. Electrochemical study.** Cyclic voltammograms of 1.0 mM (a) **1**; (b) **2**; (c) **3**; (d) **4**; (e) **5**; (f) **6**; and (g) 1-amino-2-methylantraquinone in 5 mL DMF containing 0.1 M TBAPF<sub>6</sub> under N<sub>2</sub> over 10 cycles. Experiments were conducted using a glassy carbon working electrode (3.0 mm in diameter), a Pt wire counter electrode, and a KCl-saturated calomel electrode at a scan rate of 500 mV·s<sup>-1</sup>. Source data are provided as a Source Data file.



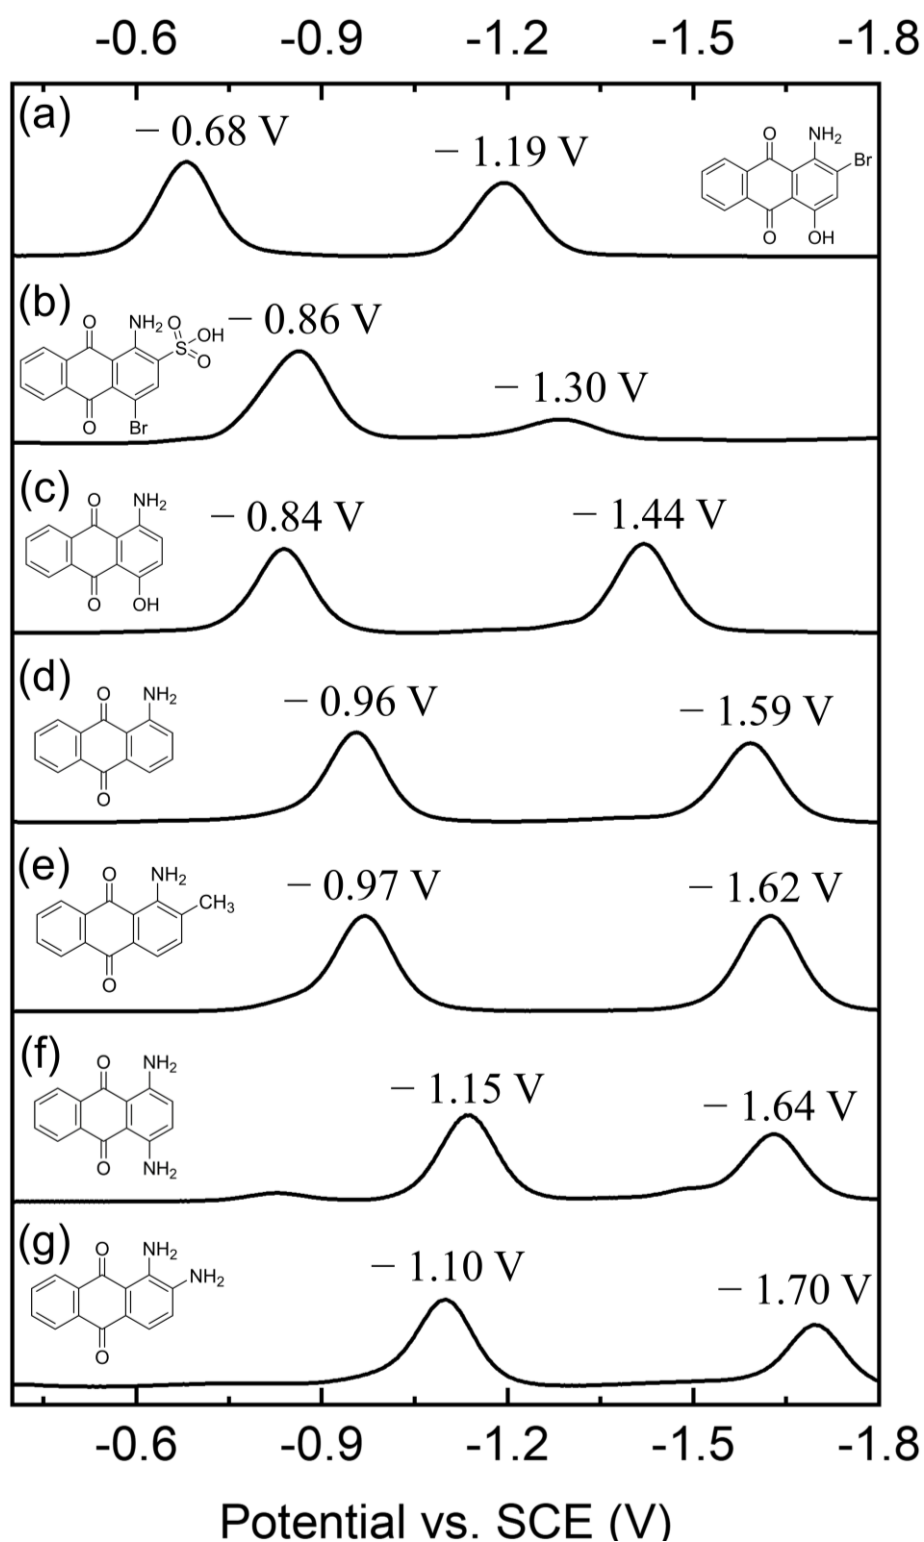

**Supplementary Figure 10. Electrochemical study.** Square wave voltammetry of 1.0 mM (a) **5**; (b) **6**; (c) **4**; (d) **1**; (e) 1-amino-2-methylantraquinone; (f) **3**; and (g) **2** in 5 mL DMF containing 0.1 M TBAPF<sub>6</sub> under N<sub>2</sub>. Experiments were conducted using a glassy carbon working electrode (3.0 mm in diameter), a Pt wire counter electrode, and a KCl-saturated calomel electrode at a scan rate of 100 mV·s<sup>-1</sup>. Source data are provided as a Source Data file.

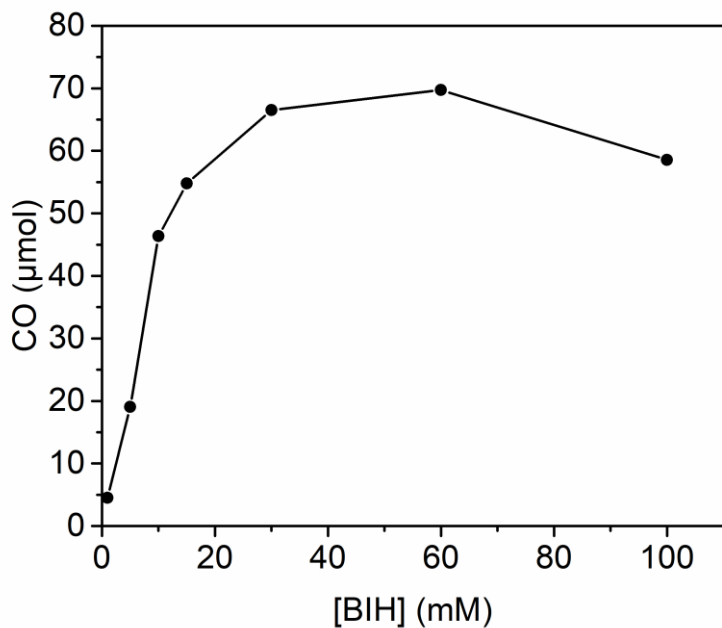

**Supplementary Figure 11. Photocatalytic experiments.** Amounts of CO generated from photocatalytic CO<sub>2</sub> reduction experiments in 5.0 mL CO<sub>2</sub>-saturated DMF solution containing 20 μM **5** and 1.0 μM FeTDHPP with varying concentrations of BIH under white LED ( $\lambda > 400$  nm, 100 mW/cm<sup>2</sup>) at 298 K. Source data are provided as a Source Data file.

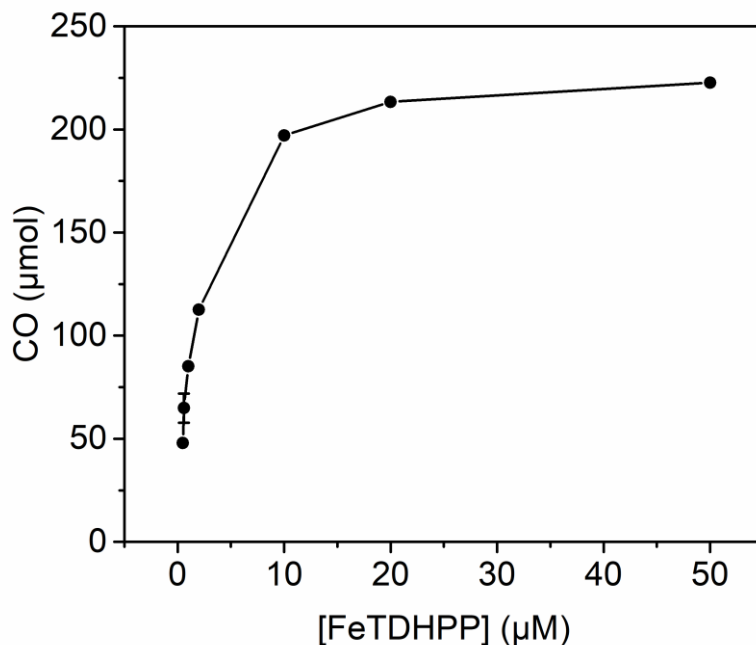

**Supplementary Figure 12. Photocatalytic experiments.** Amounts of CO generated from photocatalytic CO<sub>2</sub> reduction experiments in 5.0 mL CO<sub>2</sub>-saturated DMF solution containing 20 μM **5** and 60 mM BIH with varying concentrations of FeTDHPP under white LED ( $\lambda > 400$  nm, 100 mW/cm<sup>2</sup>) at 298 K. The error bar denotes standard deviation, based on 3 separated runs. Source data are provided as a Source Data file.

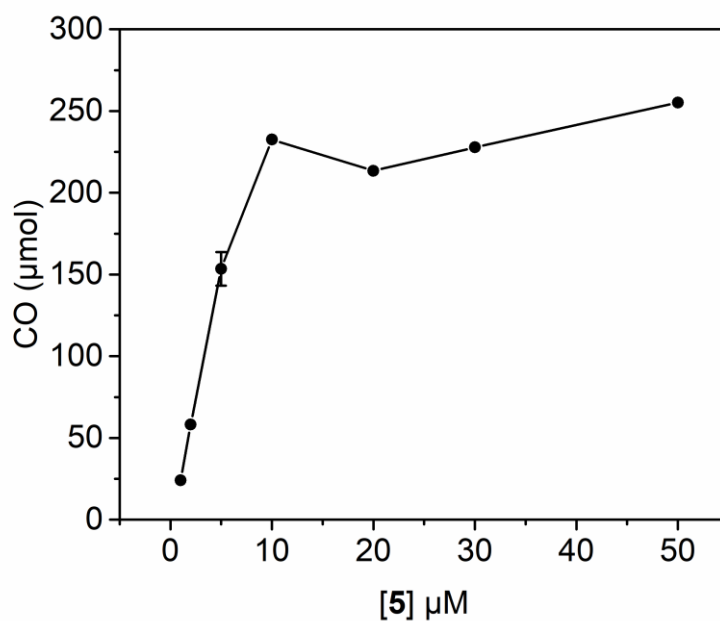

**Supplementary Figure 13. Photocatalytic experiments.** Amounts of CO generated from photocatalytic CO<sub>2</sub> reduction experiments in 5.0 mL CO<sub>2</sub>-saturated DMF solution containing 20 μM FeTDHPP and 60 mM BIH with varying concentrations of **5** under white LED ( $\lambda > 400$  nm, 100 mW/cm<sup>2</sup>) at 298 K. The error bar denotes standard deviation, based on 3 separated runs. Source data are provided as a Source Data file.

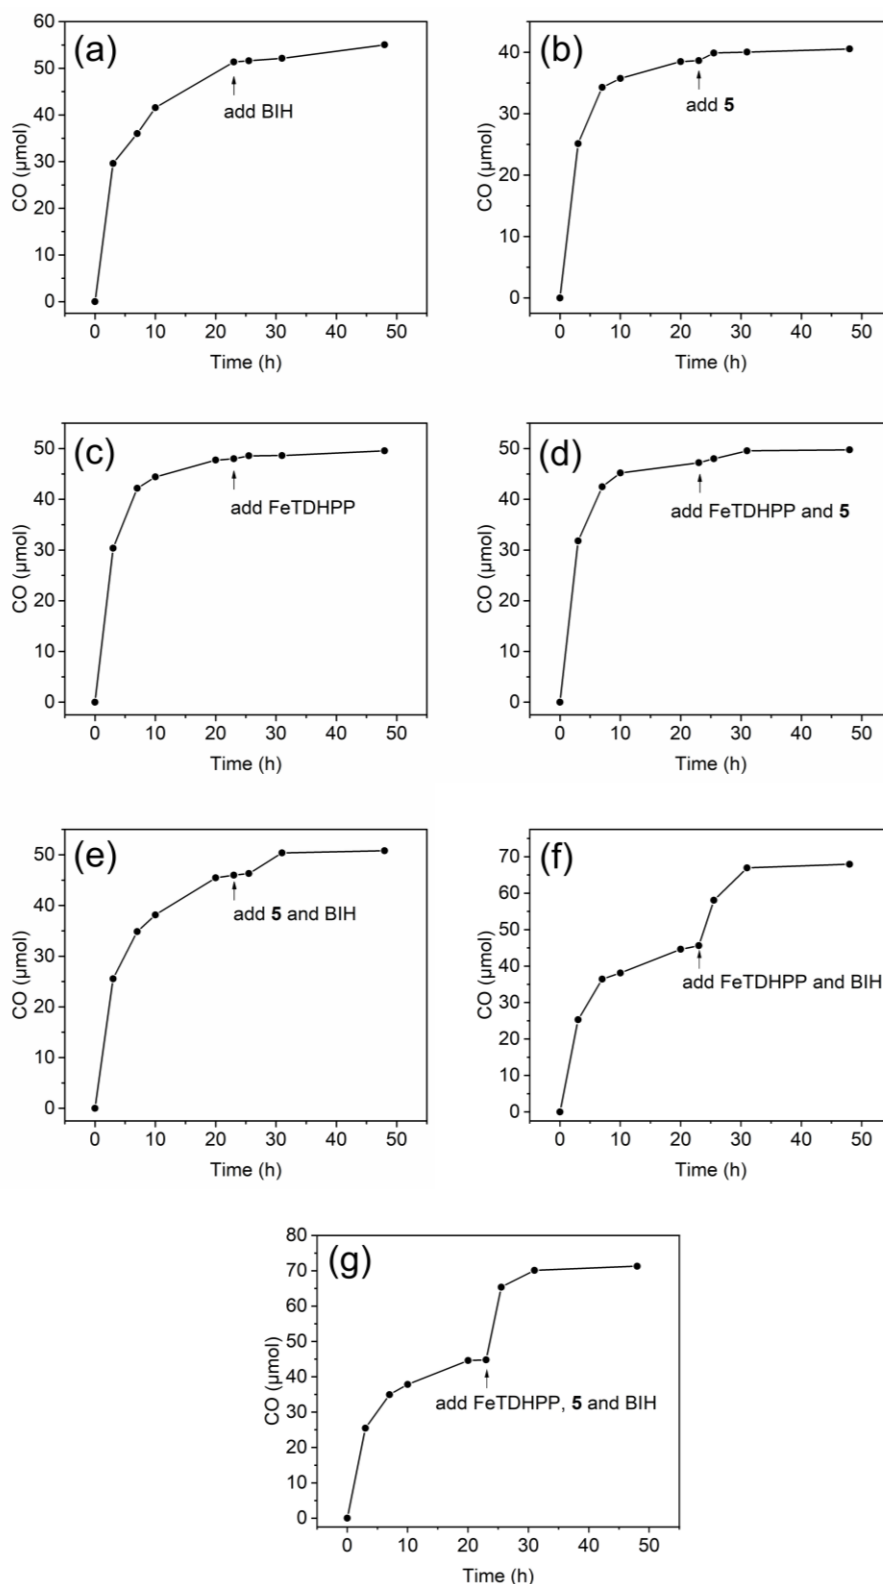

**Supplementary Figure 14. Stability tests of photocatalytic systems.** Initial photocatalytic systems containing 10 mM BIH, 1.0  $\mu\text{M}$  FeTDHPP, and 0.02 mM **5** in  $\text{CO}_2$ -saturated DMF (5.0 mL) under white LED ( $\lambda > 400 \text{ nm}$ ,  $100 \text{ mW}/\text{cm}^2$ ) at 298 K. Another equiv. of BIH (a), **5** (b), FeTDHPP (c), FeTDHPP/**5** (d), **5**/BIH (e), FeTDHPP/BIH (f) or FeTDHPP/**5**/BIH (g) in DMF (50  $\mu\text{L}$ ) was added to the reaction vials with a microsyringe at 23 h. The amount of the component added is the same as that in the initial system. Source data are provided as a Source Data file.

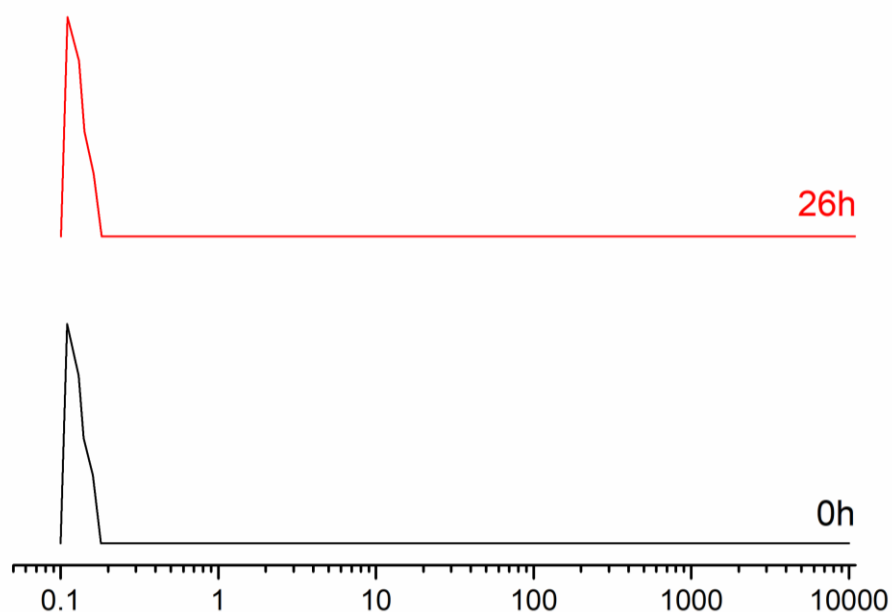

**Supplementary Figure 15. Dynamic light scattering (DLS) measurements.** Particle size distribution of a CO<sub>2</sub>-saturated DMF solution containing 10 mM BIH, 1.0 μM FeTDHPP, and 0.02 mM **5** determined by DLS before and after irradiation under white LED ( $\lambda > 400$  nm, 100 mW/cm<sup>2</sup>) at 298 K for 26 h. Source data are provided as a Source Data file.

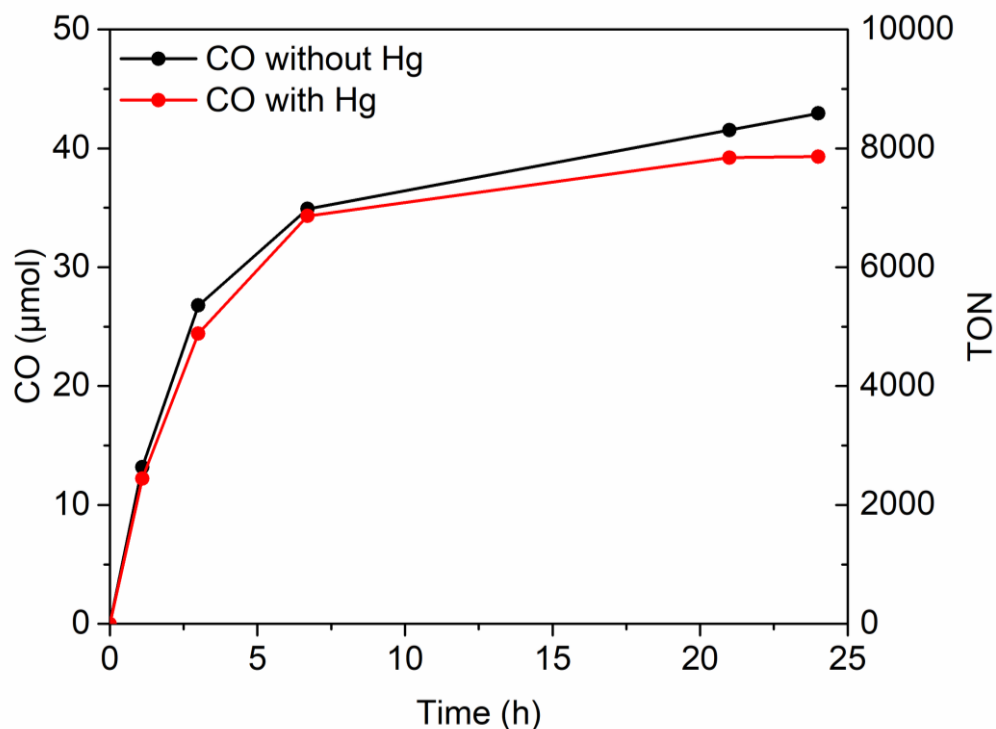

**Supplementary Figure 16. Mercury poisoning experiments.** CO generation in CO<sub>2</sub>-saturated DMF solutions containing 10 mM BIH, 1.0 μM FeTDHPP, and 0.02 mM **5** in the presence and absence of Hg<sup>0</sup> (~0.02 mL) under white LED ( $\lambda > 400$  nm, 100 mW/cm<sup>2</sup>) at 298 K. Source data are provided as a Source Data file.

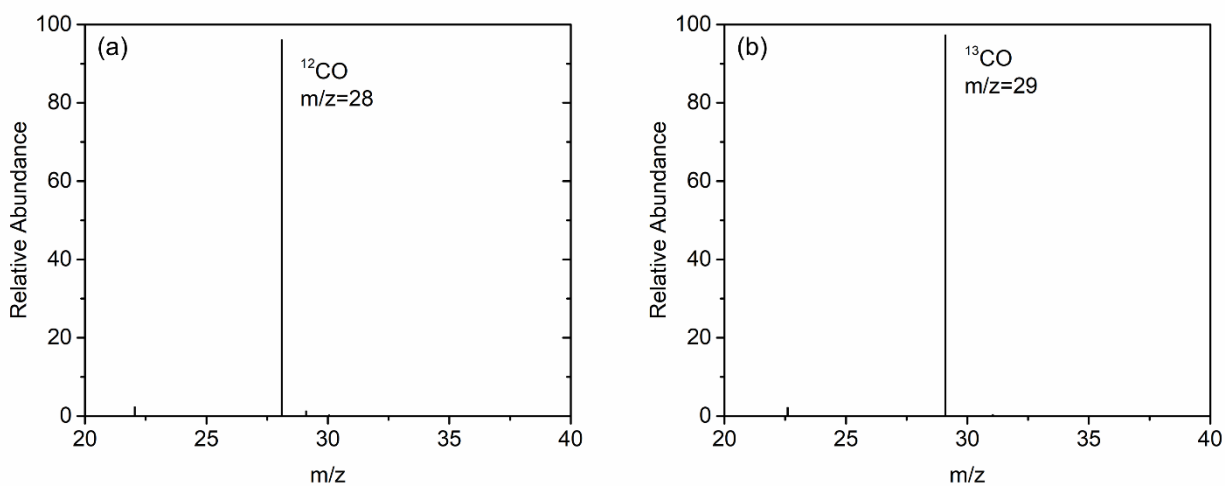

**Supplementary Figure 17. GC/MS chromatograms of CO.** Photocatalytic  $\text{CO}_2$  reduction in (a)  $^{12}\text{CO}_2$ -saturated and (b)  $^{13}\text{CO}_2$ -saturated DMF solutions containing  $2.0 \mu\text{M}$  FeTDHPP,  $60 \text{ mM}$  BIH, and  $0.02 \text{ mM}$  **5** under white LED ( $\lambda > 400 \text{ nm}$ ,  $100 \text{ mW/cm}^2$ ) at  $298 \text{ K}$ . Source data are provided as a Source Data file.

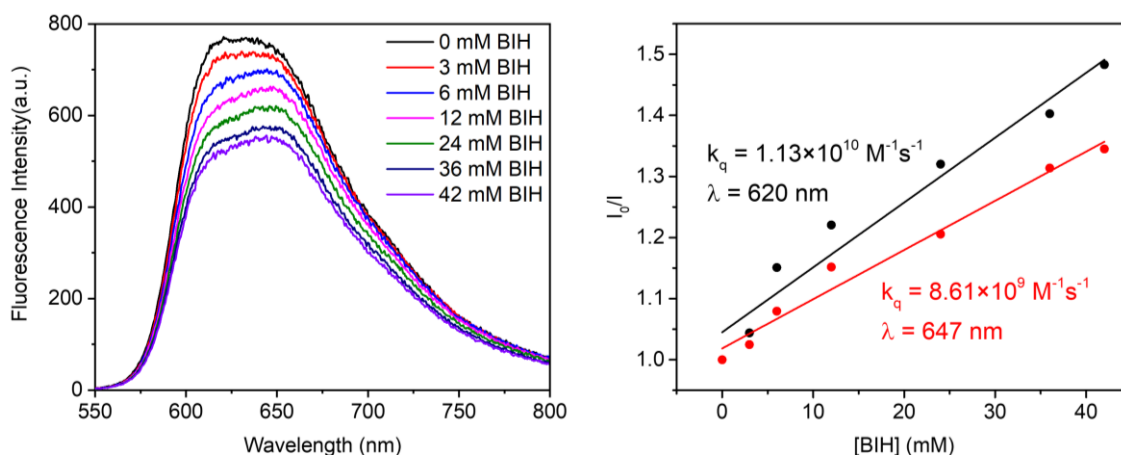

**Supplementary Figure 18. Fluorescence emission quenching.** Stern-Volmer plots at 620 nm and 647 nm (right) from fluorescence quenching (left) ( $\lambda_{\text{exc}} = 530$  nm) of **4** (50  $\mu\text{M}$ ) by BIH in DMF in a quartz cuvette (10–mm path length) at 298 K under  $\text{N}_2$ . Source data are provided as a Source Data file.

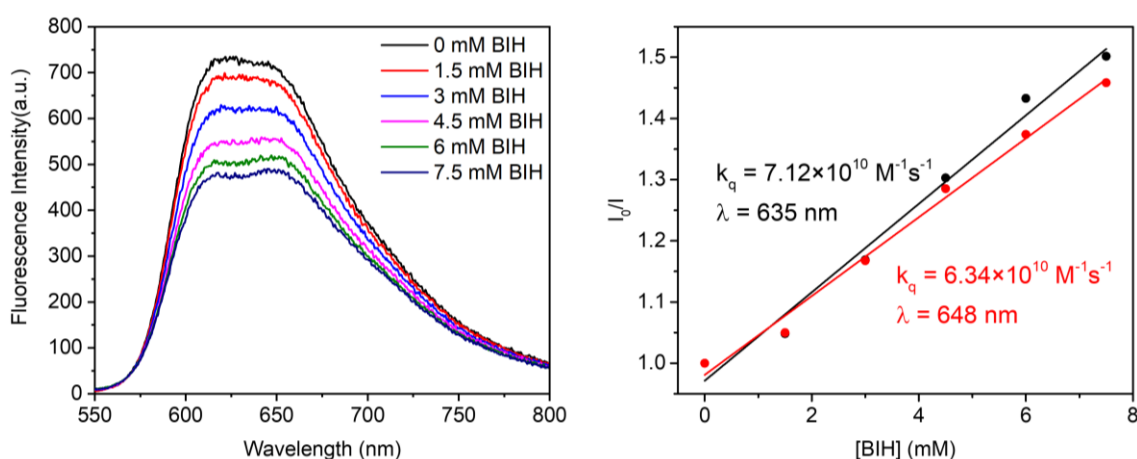

**Supplementary Figure 19. Fluorescence emission quenching.** Stern-Volmer plot at 635 nm and 648 nm (right) from fluorescence quenching (left) ( $\lambda_{\text{exc}} = 530$  nm) of **5** (50  $\mu\text{M}$ ) by BIH in DMF in a quartz cuvette (10–mm path length) at 298 K under  $\text{CO}_2$ . Source data are provided as a Source Data file.

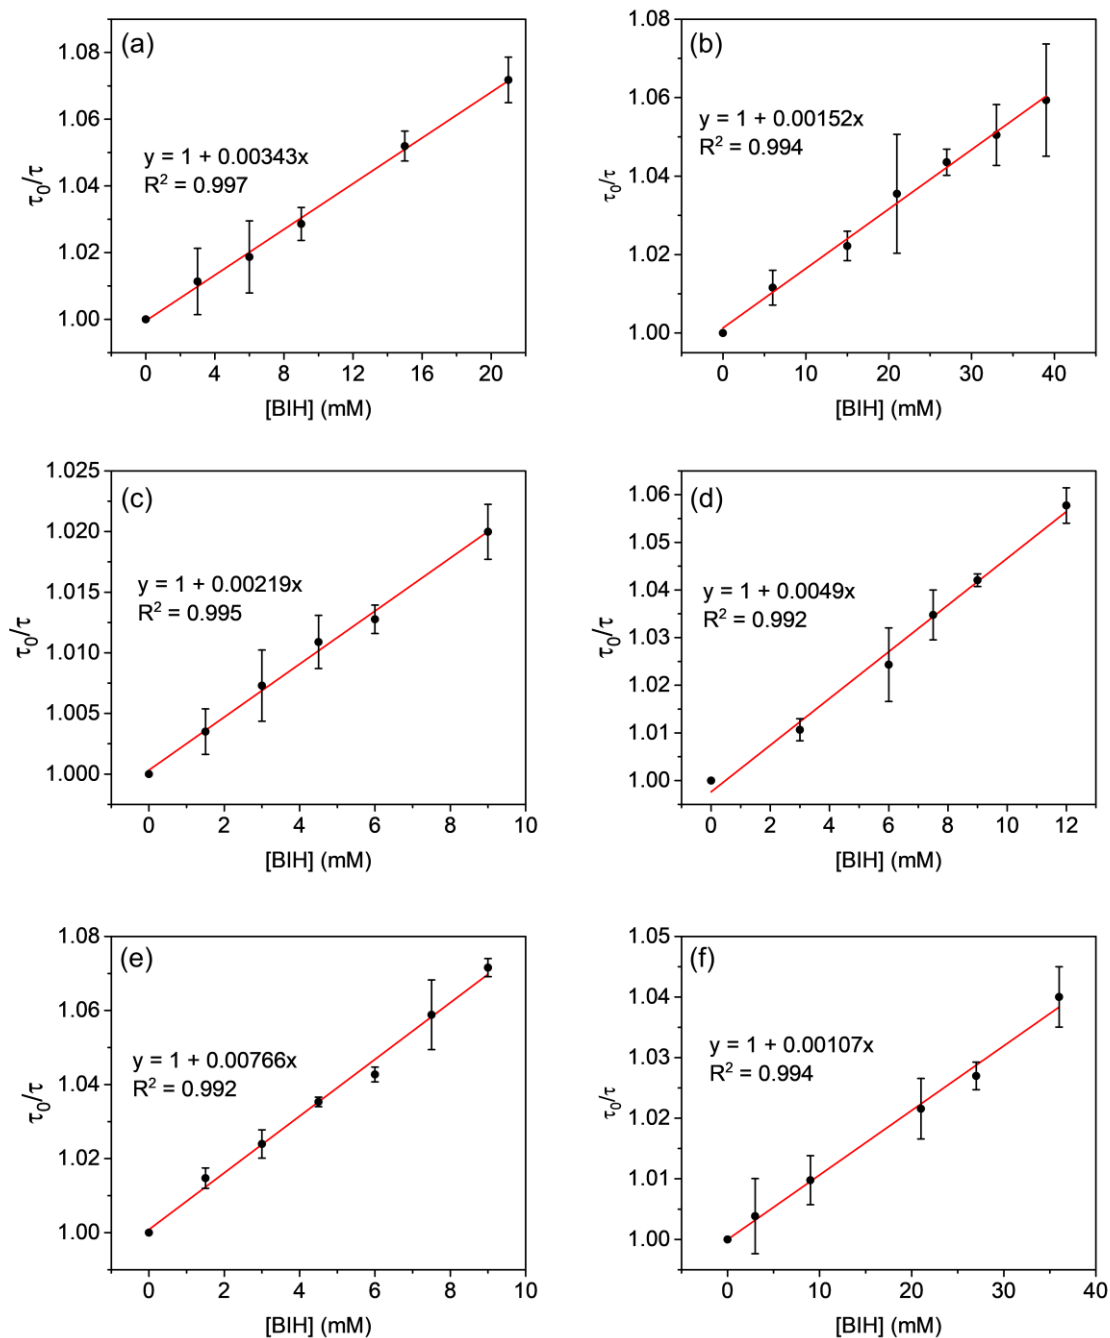

**Supplementary Figure 20. Fluorescence lifetime quenching.** Stern-Volmer plots of fluorescence lifetime quenching of 50  $\mu\text{M}$  (a) **1** ( $\lambda_{\text{em}} = 600$  nm); (b) **2** ( $\lambda_{\text{em}} = 650$  nm); (c) **3** ( $\lambda_{\text{em}} = 662$  nm); (d) **4** ( $\lambda_{\text{em}} = 620$  nm); (e) **5** ( $\lambda_{\text{em}} = 635$  nm); and (f) **6** ( $\lambda_{\text{em}} = 607$  nm) in DMF in a quartz cuvette (10-mm path length) under  $\text{N}_2$  (for **1–4** and **6**) or under  $\text{CO}_2$  (for **5**) at 298 K. The error bars denote standard deviations, based on 3 separated runs. The excitation wavelength is 472 nm. Source data are provided as a Source Data file.



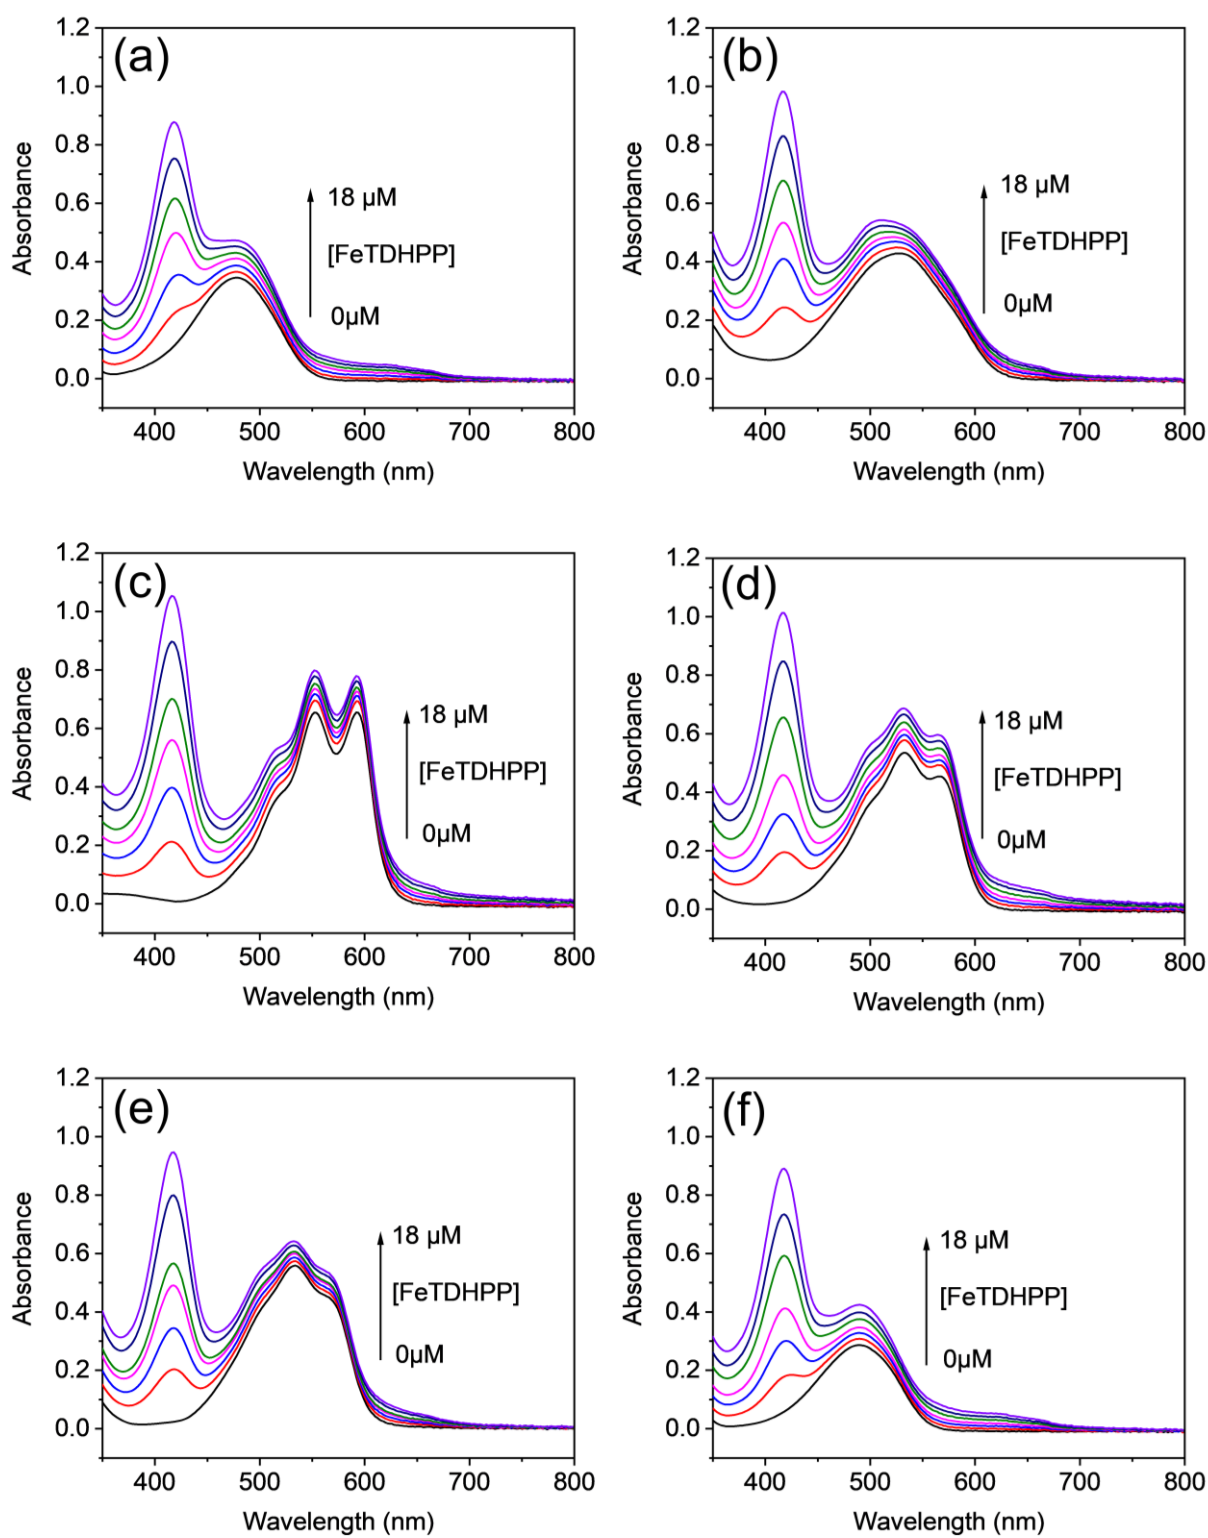

**Supplementary Figure 21. UV-vis absorption spectra.** UV-vis absorption spectra of 50 μM (a) **1**; (b) **2**; (c) **3**; (d) **4**; (e) **5**; and (f) **6** in DMF in a quartz cuvette (10-mm path length) at 298 K with addition of varying amounts of FeTDHPP. Source data are provided as a Source Data file.

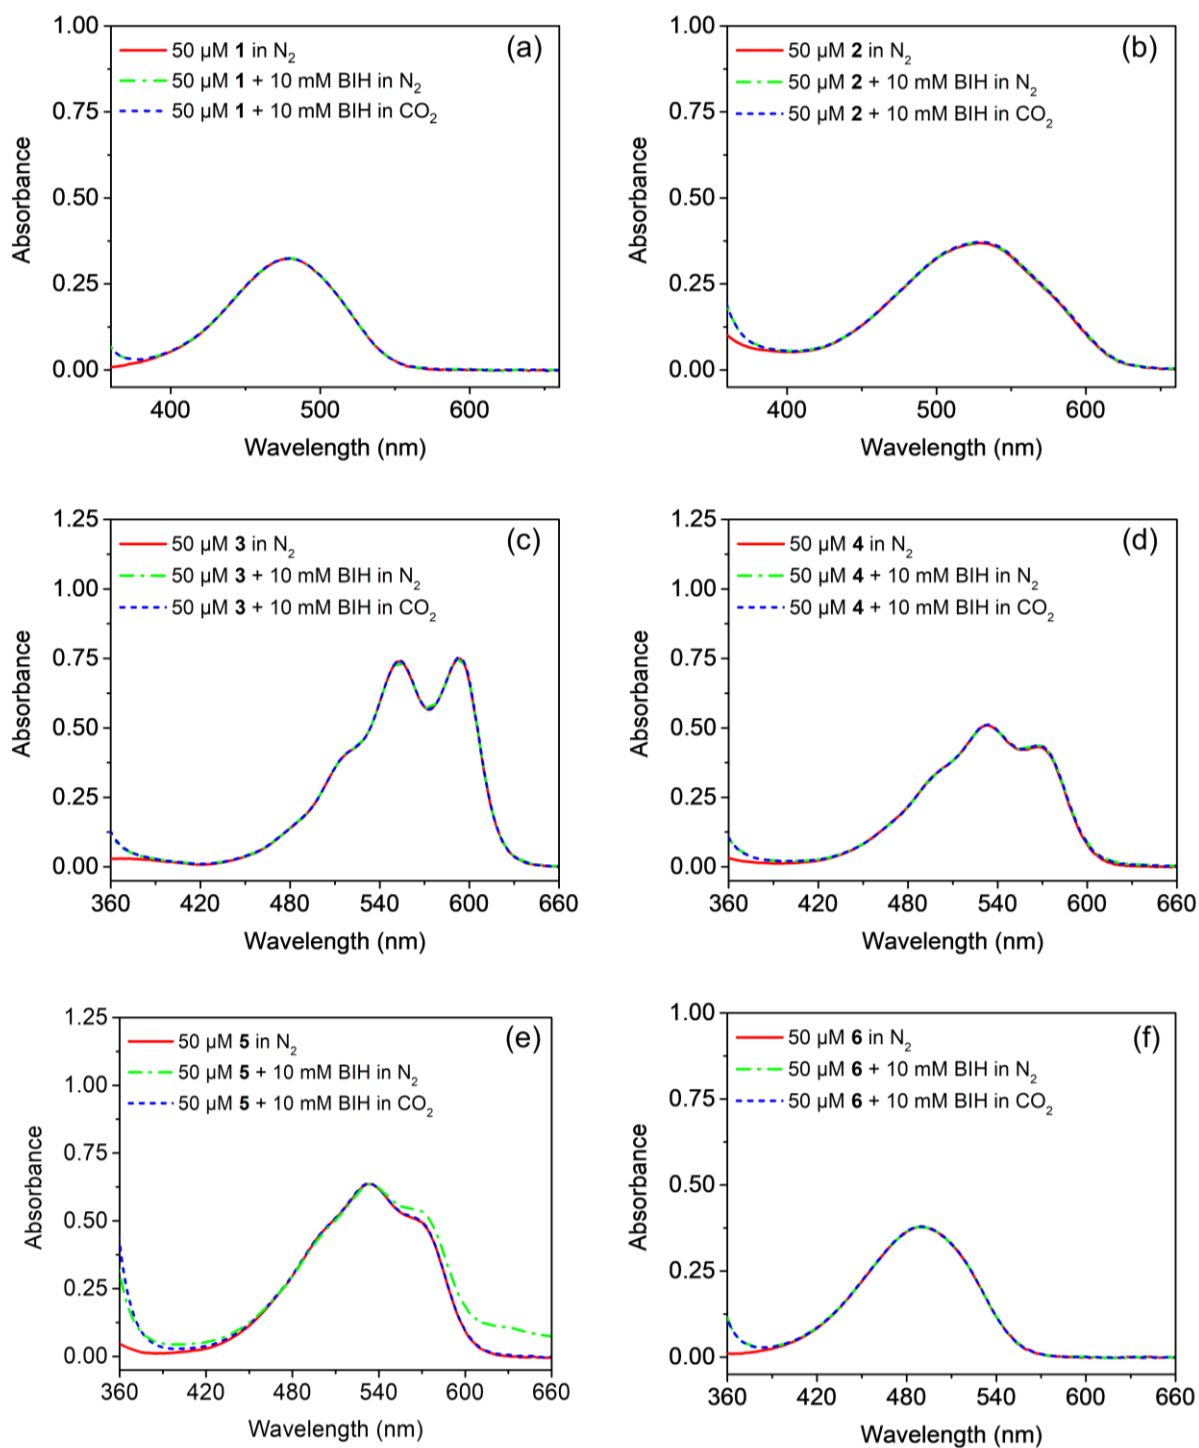

**Supplementary Figure 22. UV-vis absorption spectra.** UV-vis absorption spectra of 50  $\mu\text{M}$  (a) **1**; (b) **2**; (c) **3**; (d) **4**; (e) **5**; and (f) **6**, with or without the presence of 10 mM BIH in DMF in a quartz cuvette (10–mm path length) under  $\text{N}_2$  and  $\text{CO}_2$  at 298 K. Source data are provided as a Source Data file.

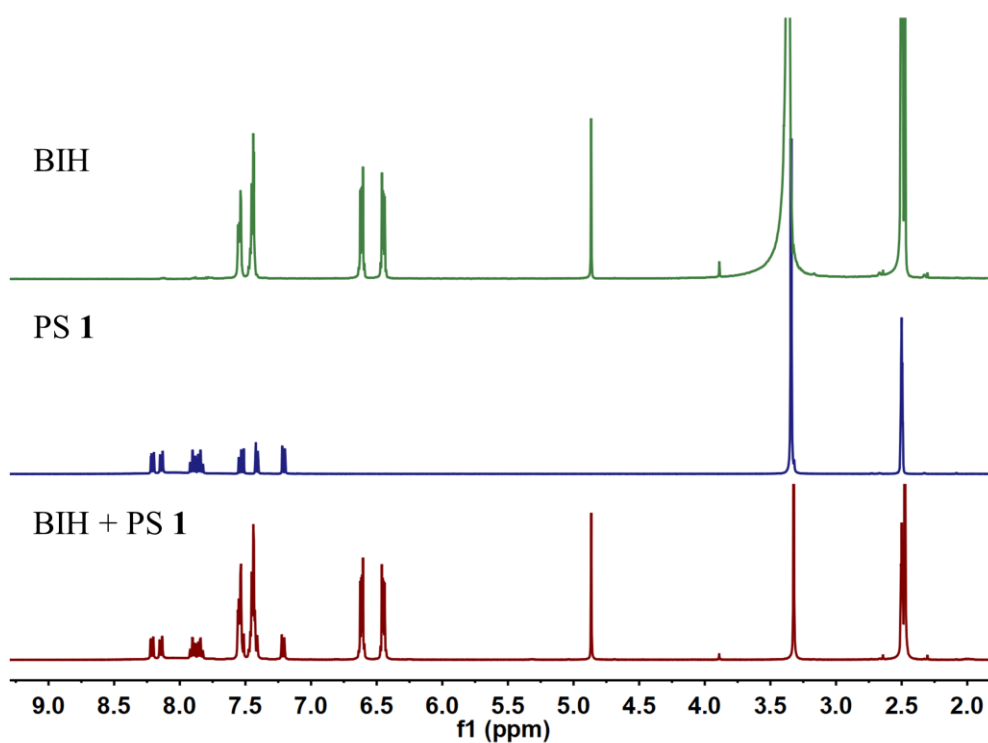

**Supplementary Figure 23. <sup>1</sup>H NMR spectra.** <sup>1</sup>H NMR (400 MHz, 298 K) spectra of BIH, PS 1, and a mixture of BIH and PS 1 in *d*<sub>6</sub>-DMSO in air.

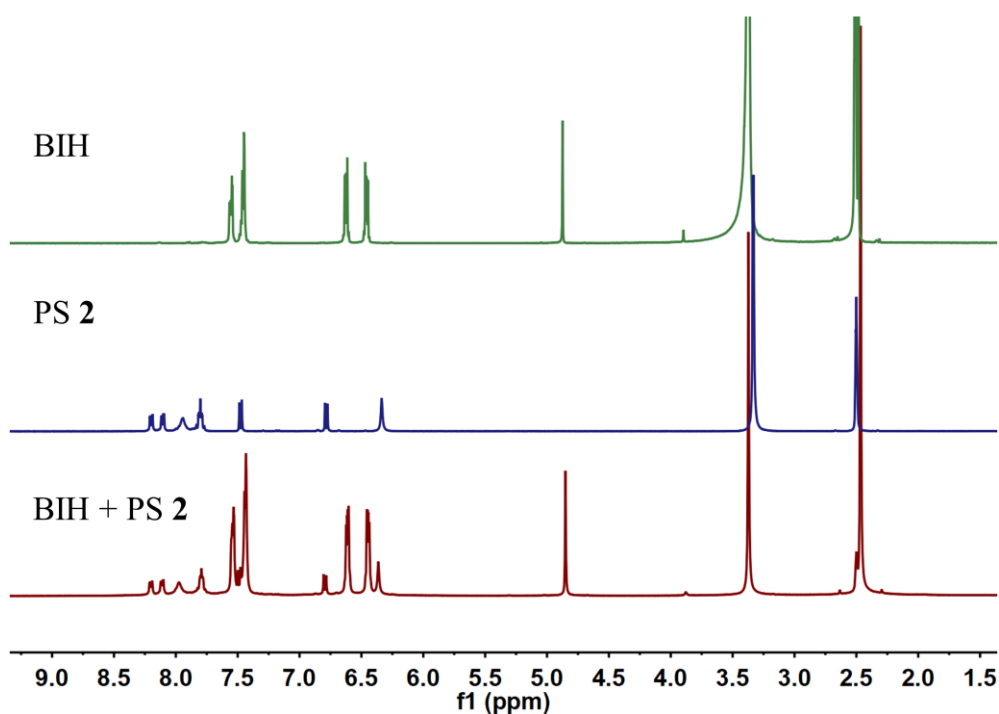

**Supplementary Figure 24. <sup>1</sup>H NMR spectra.** <sup>1</sup>H NMR (400 MHz, 298 K) spectra of BIH, PS 2, and a mixture of BIH and PS 2 in *d*<sub>6</sub>-DMSO in air.

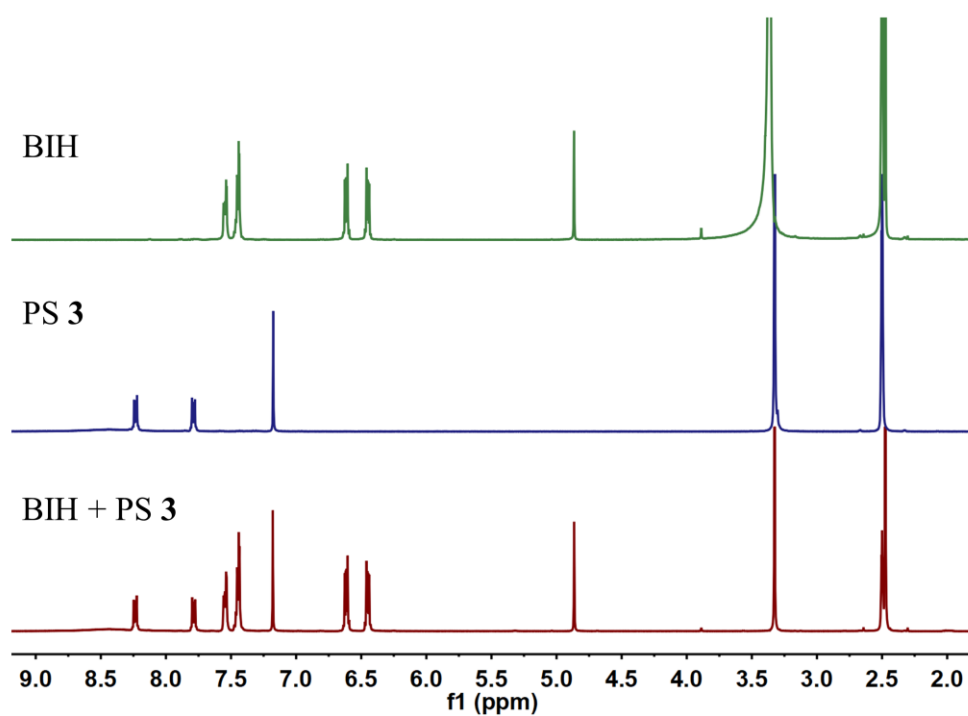

**Supplementary Figure 25. <sup>1</sup>H NMR spectra.** <sup>1</sup>H NMR (400 MHz, 298 K) spectra of BIH, PS 3, and a mixture of BIH and PS 3 in *d*<sub>6</sub>-DMSO in air.

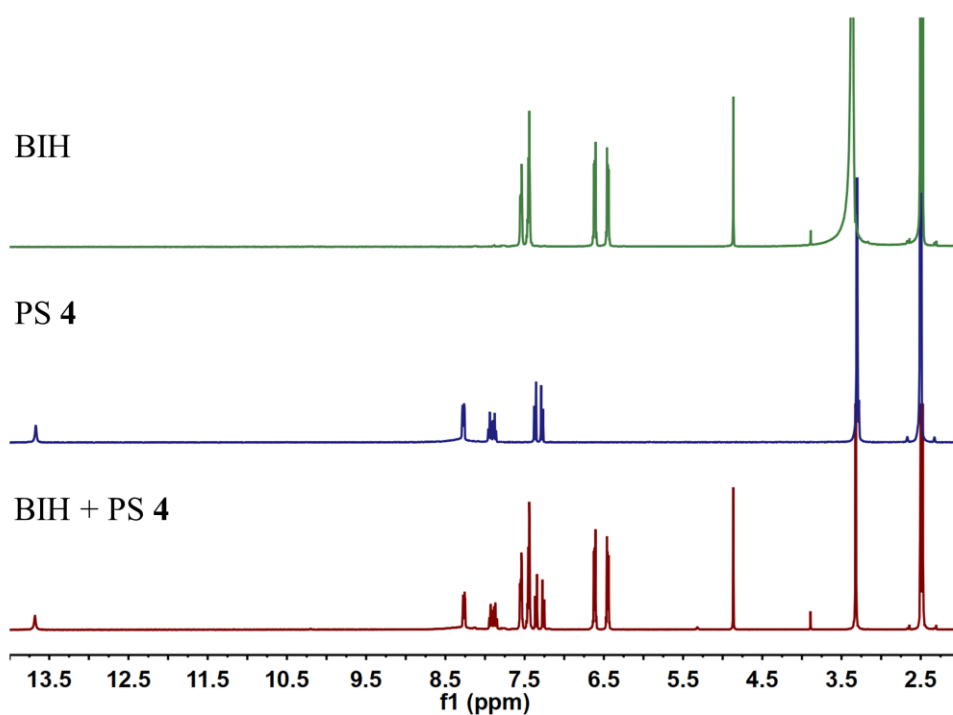

**Supplementary Figure 26. <sup>1</sup>H NMR spectra.** <sup>1</sup>H NMR (400 MHz, 298 K) spectra of BIH, PS 4, and a mixture of BIH and PS 4 in *d*<sub>6</sub>-DMSO in air.

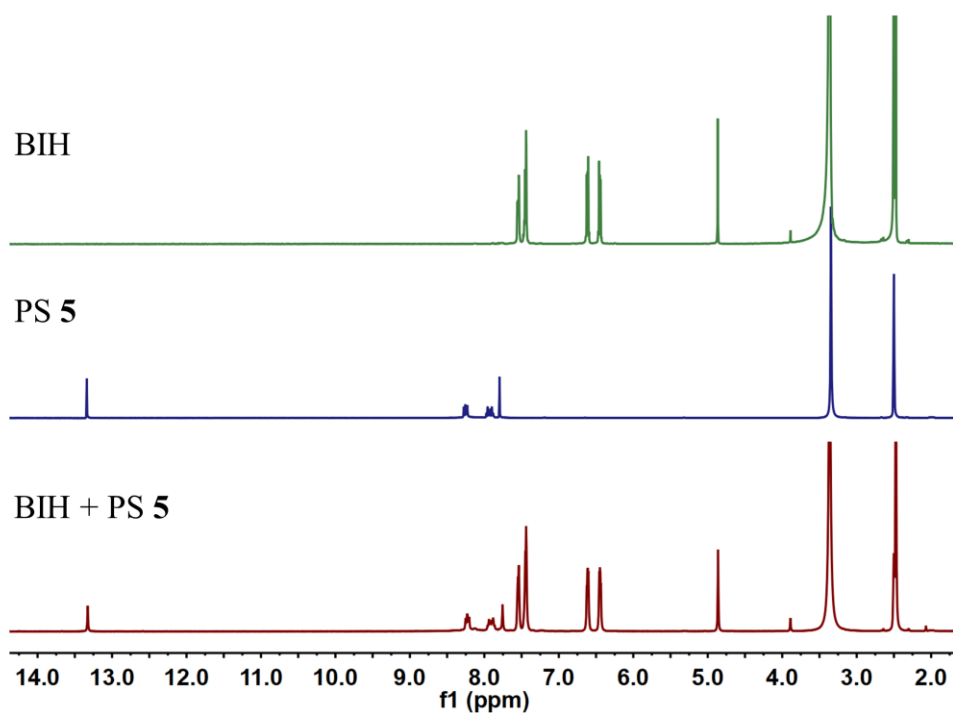

**Supplementary Figure 27. <sup>1</sup>H NMR spectra.** <sup>1</sup>H NMR (400 MHz, 298 K) spectra of BIH, PS 5, and a mixture of BIH and PS 5 in *d*<sub>6</sub>-DMSO under CO<sub>2</sub>.

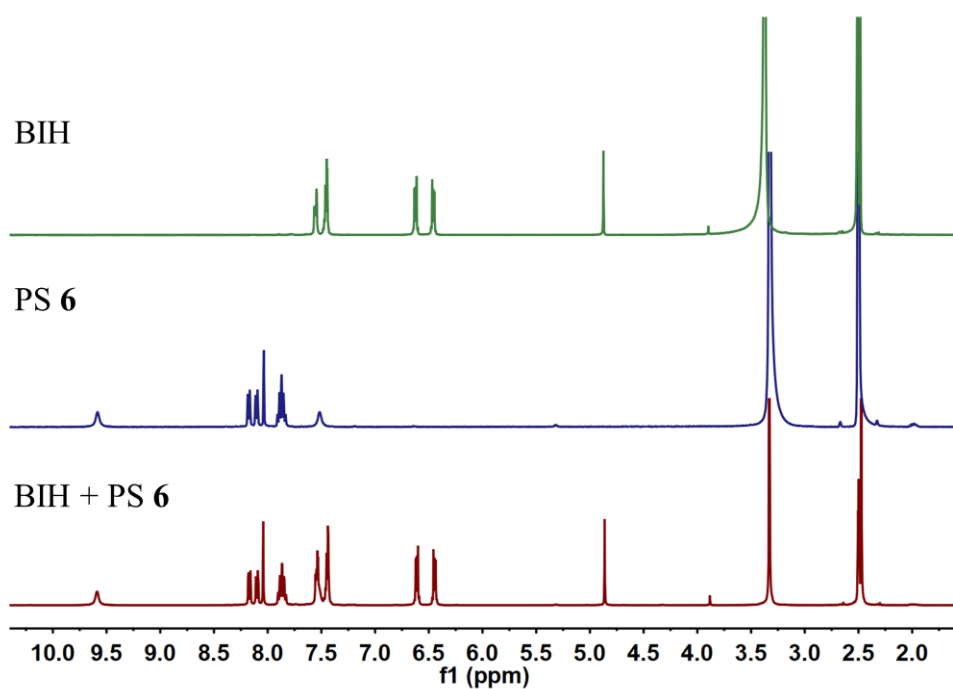

**Supplementary Figure 28. <sup>1</sup>H NMR spectra.** <sup>1</sup>H NMR (400 MHz, 298 K) spectra of BIH, PS 6, and a mixture of BIH and PS 6 in *d*<sub>6</sub>-DMSO in air.

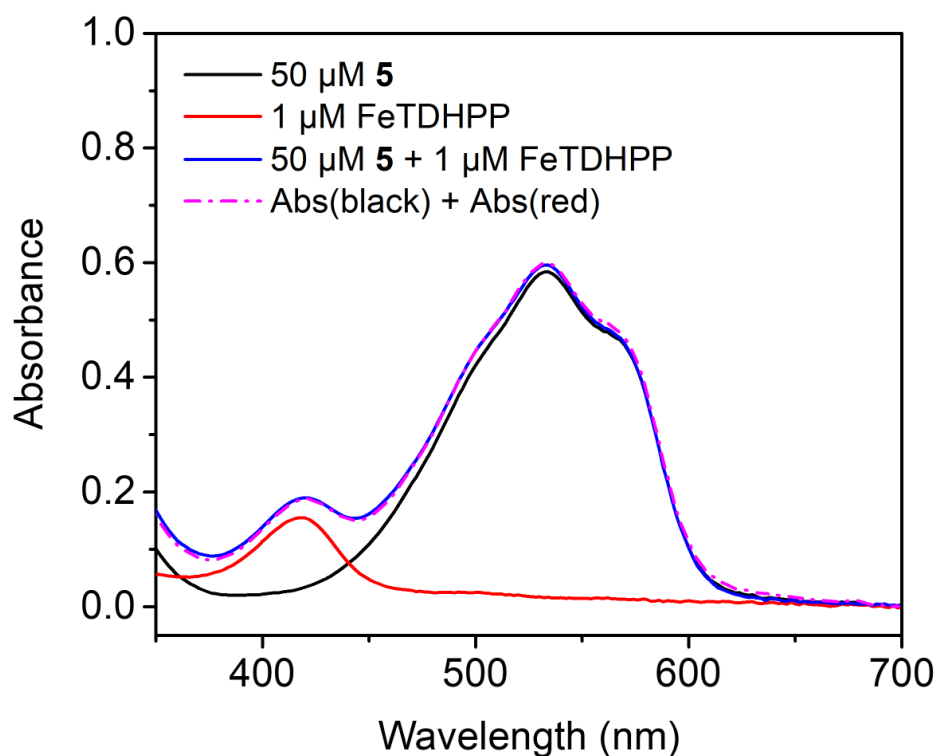

**Supplementary Figure 29. UV-vis absorption spectra.** UV-vis absorption spectra of 50  $\mu\text{M}$  **5** (black), 1  $\mu\text{M}$  FeTDHPP (red), and a mixture of 50  $\mu\text{M}$  **5** and 1  $\mu\text{M}$  FeTDHPP (blue) in DMF in a quartz cuvette (10-mm path length) under  $\text{CO}_2$  at 298 K. Source data are provided as a Source Data file.

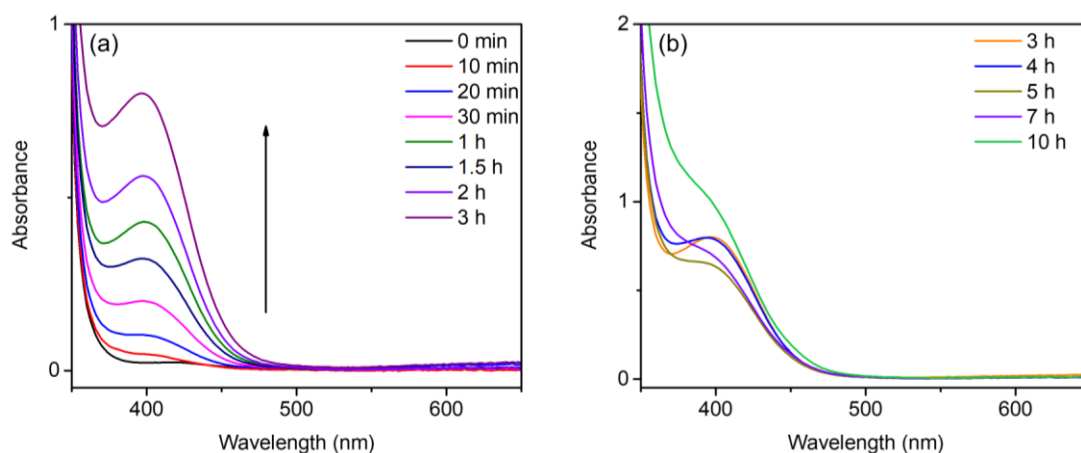

**Supplementary Figure 30. UV-vis absorption spectra.** UV-vis absorption spectra of systems containing 10 mM BIH, 1  $\mu\text{M}$  FeTDHPP, and 20  $\mu\text{M}$  AQ in  $\text{CO}_2$ -saturated DMF in a quartz cuvette (10-mm path length) at 298 K under irradiation with a white LED ( $\lambda > 400$  nm,  $100 \text{ mW}/\text{cm}^2$ ). Irradiation time ranging from 0 to 3 h (a), and from 3 h to 10 h (b).

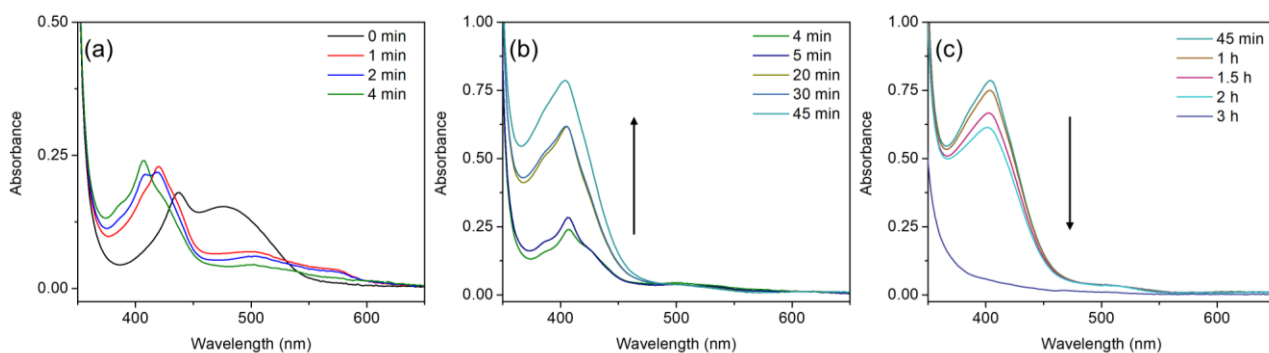

**Supplementary Figure 31. UV-vis absorption spectra.** UV-vis absorption spectra of systems containing 10 mM BIH, 1  $\mu\text{M}$  FeTDHPP, and 20  $\mu\text{M}$  **1** in  $\text{CO}_2$ -saturated DMF in a quartz cuvette (10-mm path length) at 298 K under irradiation with a white LED ( $\lambda > 400$  nm,  $100 \text{ mW}/\text{cm}^2$ ). Irradiation time ranging from 0 to 4 min (a), from 4 to 45 min (b), and from 45 min to 3 h (c).

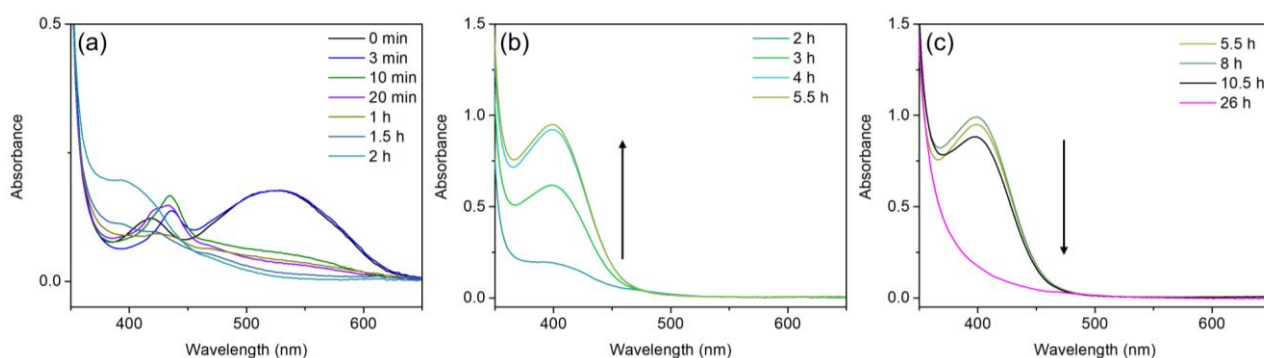

**Supplementary Figure 32. UV-vis absorption spectra.** UV-vis absorption spectra of systems containing 10 mM BIH, 1  $\mu\text{M}$  FeTDHPP and 20  $\mu\text{M}$  **2** in  $\text{CO}_2$ -saturated DMF in a quartz cuvette (10-mm path length) at 298 K under irradiation with a white LED ( $\lambda > 400$  nm,  $100 \text{ mW}/\text{cm}^2$ ). Irradiation time ranging from 0 to 2 h (a), from 2 to 5.5 h (b), and from 5.5 to 26 h (c).

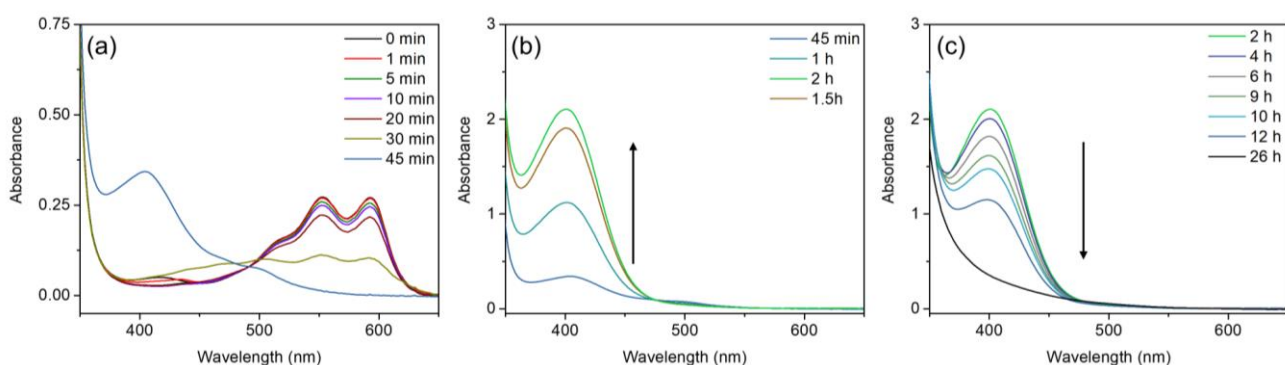

**Supplementary Figure 33. UV-vis absorption spectra.** UV-vis absorption spectra of systems containing 10 mM BIH, 1  $\mu\text{M}$  FeTDHPP and 20  $\mu\text{M}$  **3** in  $\text{CO}_2$ -saturated DMF in a quartz cuvette (10-mm path length) at 298 K under irradiation with a white LED ( $\lambda > 400$  nm,  $100 \text{ mW}/\text{cm}^2$ ). Irradiation time ranging from 0 to 45 min (a), from 45 min to 2 h (b), and from 2 to 26 h (c).

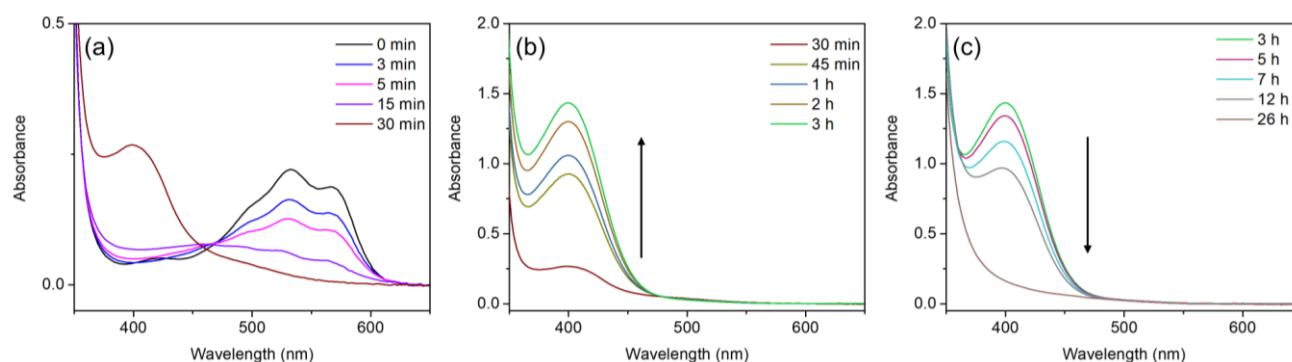

**Supplementary Figure 34. UV-vis absorption spectra.** UV-vis absorption spectra of systems containing 10 mM BIH, 1  $\mu\text{M}$  FeTDHPP and 20  $\mu\text{M}$  **4** in  $\text{CO}_2$ -saturated DMF in a quartz cuvette (10-mm path length) at 298 K under irradiation with a white LED ( $\lambda > 400$  nm,  $100 \text{ mW}/\text{cm}^2$ ). Irradiation time ranging from 0 to 30 min (a), from 30 min to 3 h (b), and from 3 to 26 h (c).

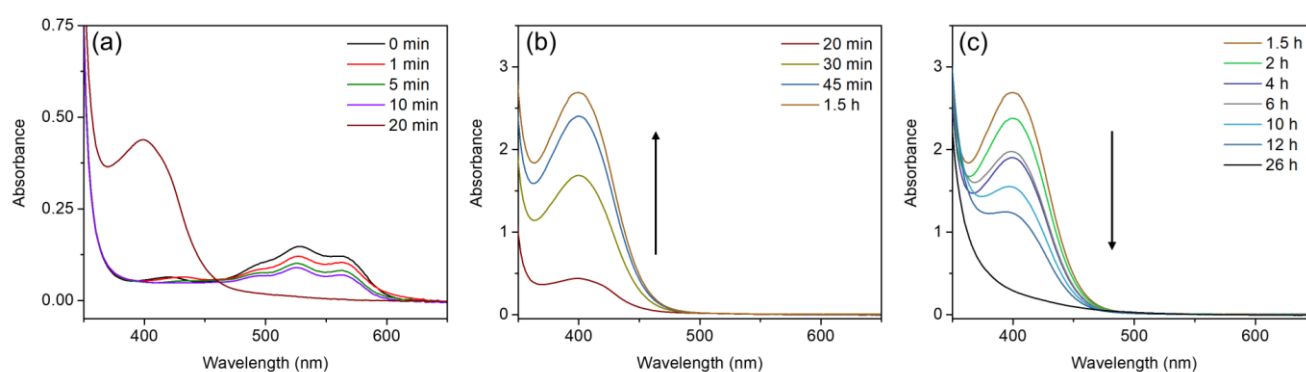

**Supplementary Figure 35. UV-vis absorption spectra.** UV-vis absorption spectra of systems containing 10 mM BIH, 1  $\mu\text{M}$  FeTDHPP and 20  $\mu\text{M}$  **5** in  $\text{CO}_2$ -saturated DMF in a quartz cuvette (10-mm path length) at 298 K under irradiation with a white LED ( $\lambda > 400$  nm,  $100 \text{ mW}/\text{cm}^2$ ). Irradiation time ranging from 0 to 20 min (a), from 20 min to 1.5 h (b), and from 1.5 to 26 h (c).

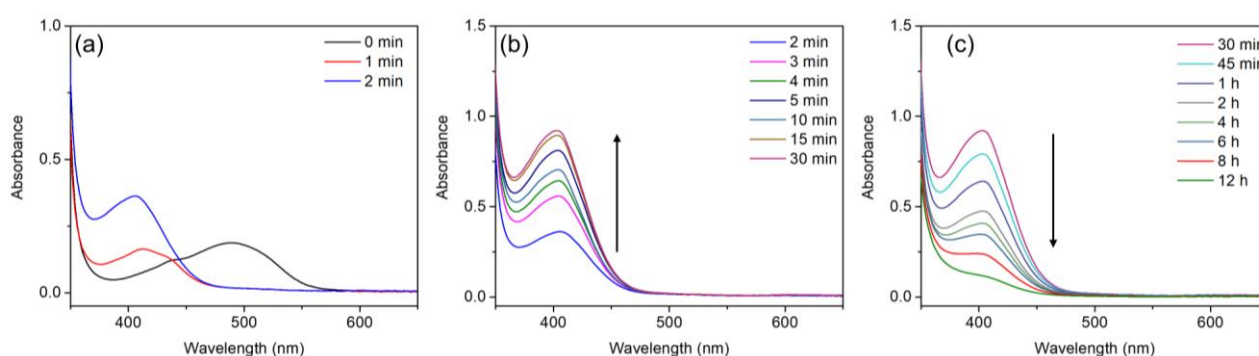

**Supplementary Figure 36. UV-vis absorption spectra.** UV-vis absorption spectra of systems containing 10 mM BIH, 1  $\mu\text{M}$  FeTDHPP and 20  $\mu\text{M}$  **6** in  $\text{CO}_2$ -saturated DMF in a quartz cuvette (10-mm path length) at 298 K under irradiation with a white LED ( $\lambda > 400$  nm,  $100 \text{ mW}/\text{cm}^2$ ). Irradiation time ranging from 0 to 2 min (a), from 2 to 30 min (b), and from 30 min to 12 h (c).



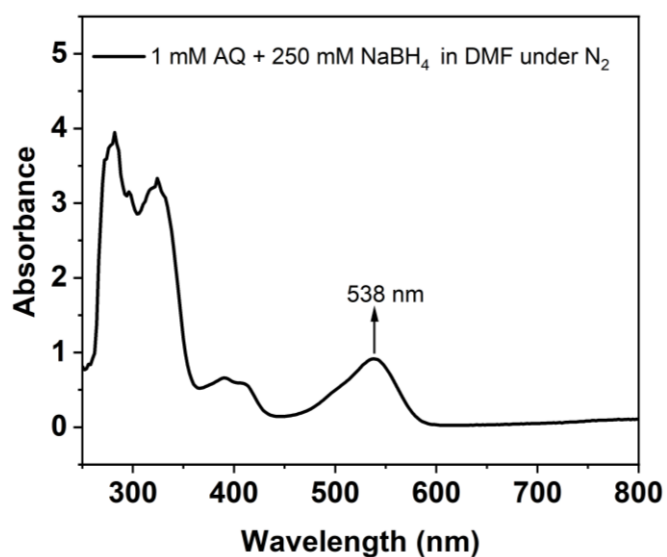

**Supplementary Figure 37. UV-vis absorption spectrum.** UV-vis absorption spectrum of a system containing AQ (1.0 mM) and NaBH<sub>4</sub> (250 mM) in DMF for 30 min under N<sub>2</sub> at 298 K.

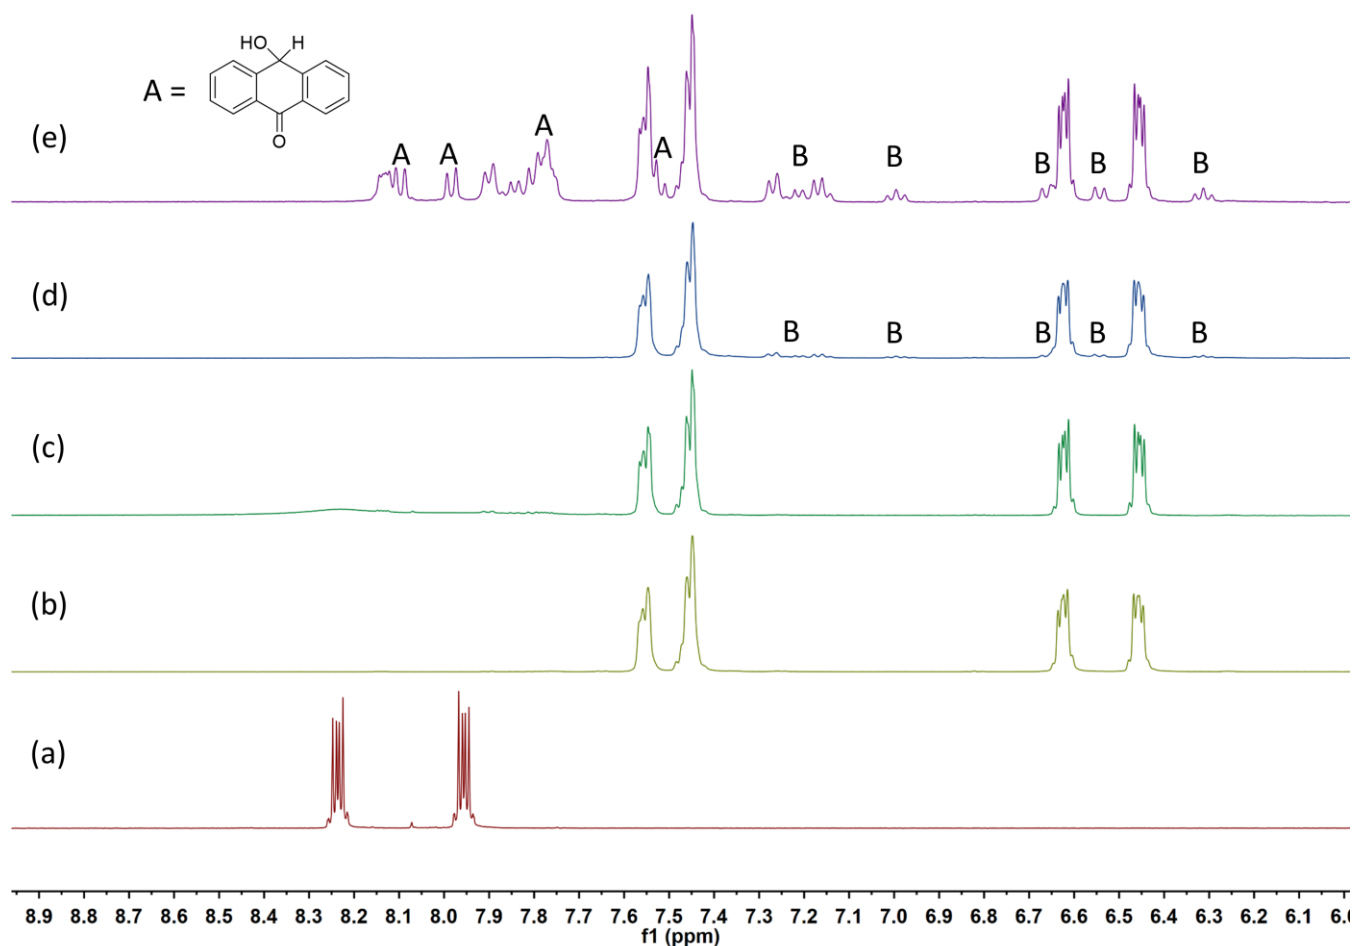

**Supplementary Figure 38. <sup>1</sup>H NMR spectra in DMSO-*d*<sub>6</sub>.** (a) AQ. (b) BIH. (c) A mixture of AQ and 2.0 equiv of BIH. (d) BIH irradiated for 21 h with a white LED ( $\lambda > 400$  nm, 100 mW/cm<sup>2</sup>). (e) A mixture of AQ and 2.0 equiv of BIH irradiated for 22 h with a white LED ( $\lambda > 400$  nm, 100 mW/cm<sup>2</sup>); products: 10-hydroxyanthrone (A),<sup>1</sup> and species (B) attributed to the decomposition of BIH.

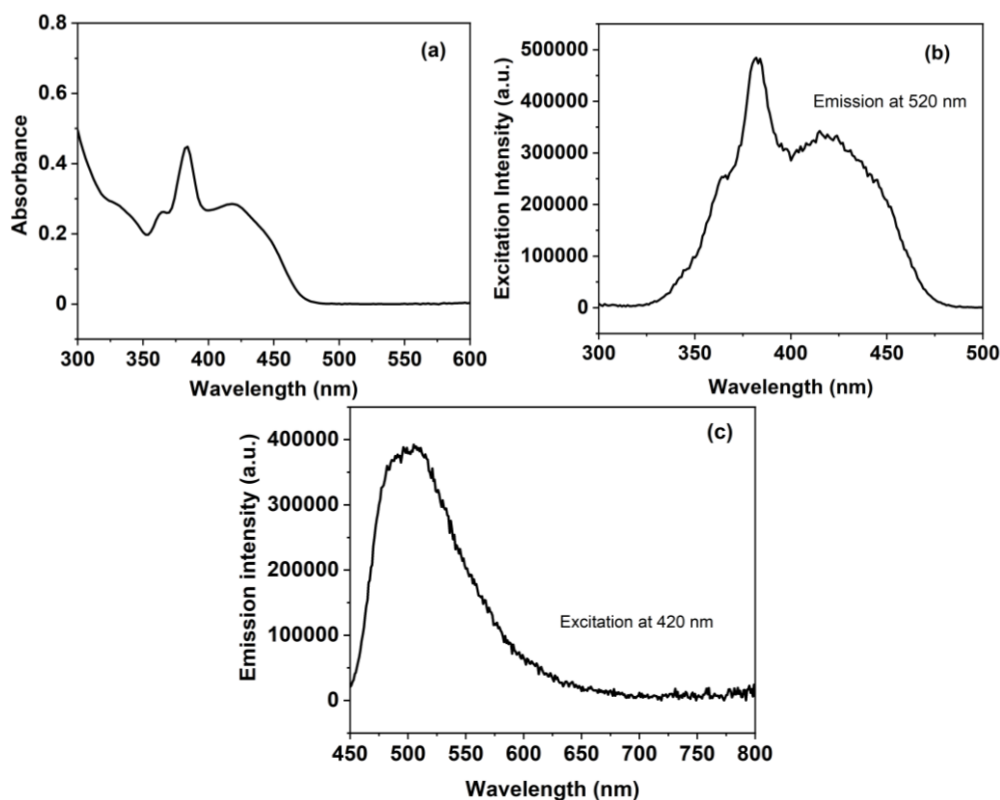

**Supplementary Figure S39. Spectra of AQH<sub>2</sub>.** UV-vis spectrum (a), excitation spectrum (b) and emission spectrum (c) of AQH<sub>2</sub> in DMSO-d<sub>6</sub> in a quartz cuvette (10-mm path length). Similar results have been previously reported.<sup>1</sup> The AQH<sub>2</sub> species was generated from a procedure as follows: A DMSO-d<sub>6</sub> solution (1.0 mL) containing 0.1 mmol AQ was added to NaBH<sub>4</sub> (0.15 mmol) under N<sub>2</sub>. The reaction mixture was allowed to stir for 6 h at room temperature under N<sub>2</sub>. Then 1000 eq. CH<sub>3</sub>COOH was added to generate the AQH<sub>2</sub>. The spectra were recorded in a diluted solution (dilution factor of 2000) under N<sub>2</sub>.

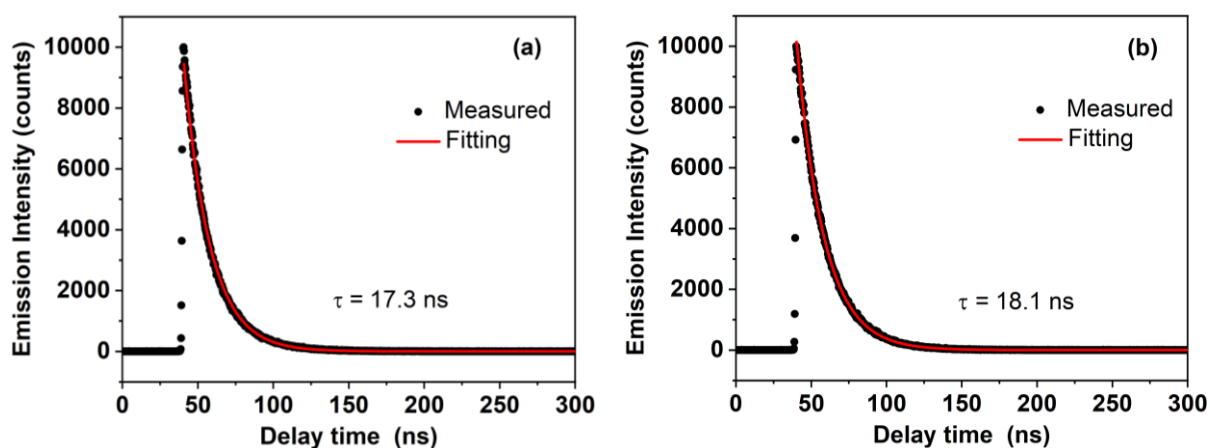

**Supplementary Figure S40. Emission decay of AQH<sub>2</sub>.** Emission decay of the *in situ* generated AQH<sub>2</sub> in DMF (a) or DMSO-d<sub>6</sub> (b) in a quartz cuvette (10-mm path length) under N<sub>2</sub> at 298 K. The lines were fitted with a single exponential. The AQH<sub>2</sub> species was generated from a procedure as follows: A DMSO-d<sub>6</sub> solution (1.0 mL) containing 0.1 mmol AQ was added to NaBH<sub>4</sub> (0.15 mmol) under N<sub>2</sub>. The reaction mixture was allowed to stir for 6 h at room temperature under N<sub>2</sub>. Then 1000 eq. CH<sub>3</sub>COOH was added to generate the AQH<sub>2</sub>. The spectra were recorded in a diluted solution (dilution factor of 2000) under N<sub>2</sub>.

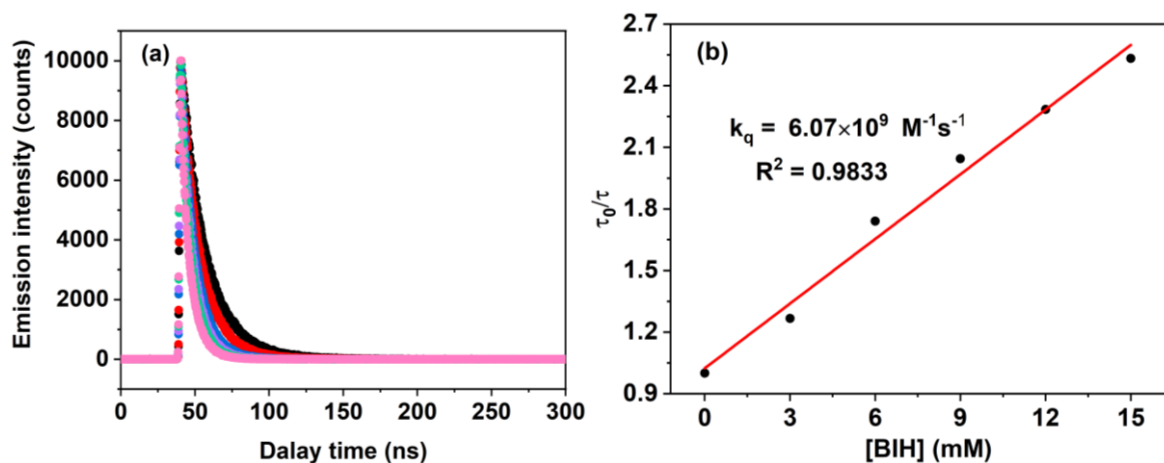

**Supplementary Figure S41. Luminescence lifetime quenching of AQH<sub>2</sub>.** Emission decay of the *in situ* generated AQH<sub>2</sub> with addition of different concentrations of BIH in DMF in a quartz cuvette (10–mm path length) under N<sub>2</sub> at 298 K, with lines fitted with a single exponential (a). A Stern-Volmer plot showing a quenching rate constant of  $6.07 \times 10^9 \text{ M}^{-1} \cdot \text{s}^{-1}$  (b). The excitation wavelength was 406.5 nm. The AQH<sub>2</sub> species was generated from a procedure as follows: A DMSO-d<sub>6</sub> solution (1.0 mL) containing 0.1 mmol AQ was added to NaBH<sub>4</sub> (0.15 mmol) under N<sub>2</sub>. The reaction mixture was allowed to stir for 6 h at room temperature under N<sub>2</sub>. Then 1000 eq. CH<sub>3</sub>COOH was added to generated the AQH<sub>2</sub>. The spectra were recorded in a diluted solution (dilution factor of 2000) under N<sub>2</sub>.

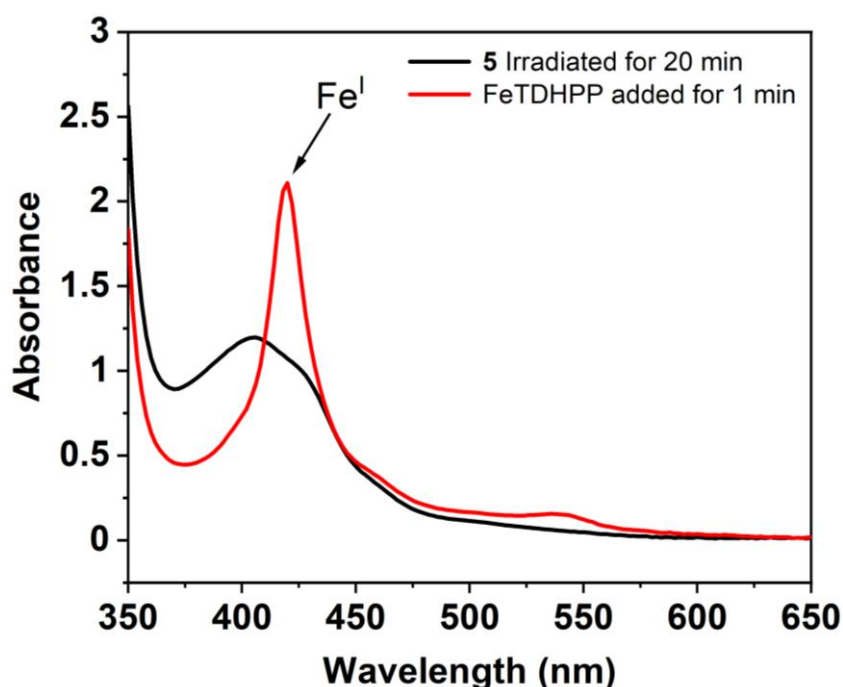

**Supplementary Figure S42. UV-vis absorption spectra.** UV-vis absorption spectra of systems containing PS **5** (40  $\mu\text{M}$ ) and BIH (20 mM) in DMF (2 mL) in a quartz cuvette (10–mm path length) under CO<sub>2</sub> upon irradiation with white LED light ( $\lambda > 400 \text{ nm}$ , 100 mW/cm<sup>2</sup>) for 20 min (black), and then added with FeTDHPP (0.25 equiv vs **5**) for 1 min (red). The amount of CO quantitated by GC was  $0.027 \pm 0.001 \mu\text{mol}$  after addition of FeTDHPP.

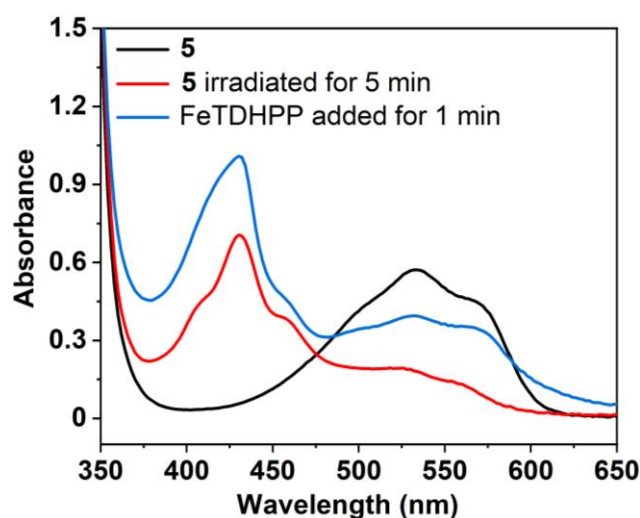

**Supplementary Figure S43. UV-vis absorption spectra.** UV-vis absorption spectra of systems containing PS **5** (40  $\mu\text{M}$ ) and BIH (20 mM) in DMF (2 mL) in a quartz cuvette (10-mm path length) under  $\text{CO}_2$  before (black) and after irradiation with white LED light ( $\lambda > 400$  nm,  $100$  mW/cm<sup>2</sup>) for 5 minutes (red), and then added with FeTDHPP (0.25 equiv vs **5**) for 1 min (blue). No CO was detected after adding FeTDHPP by GC analysis.

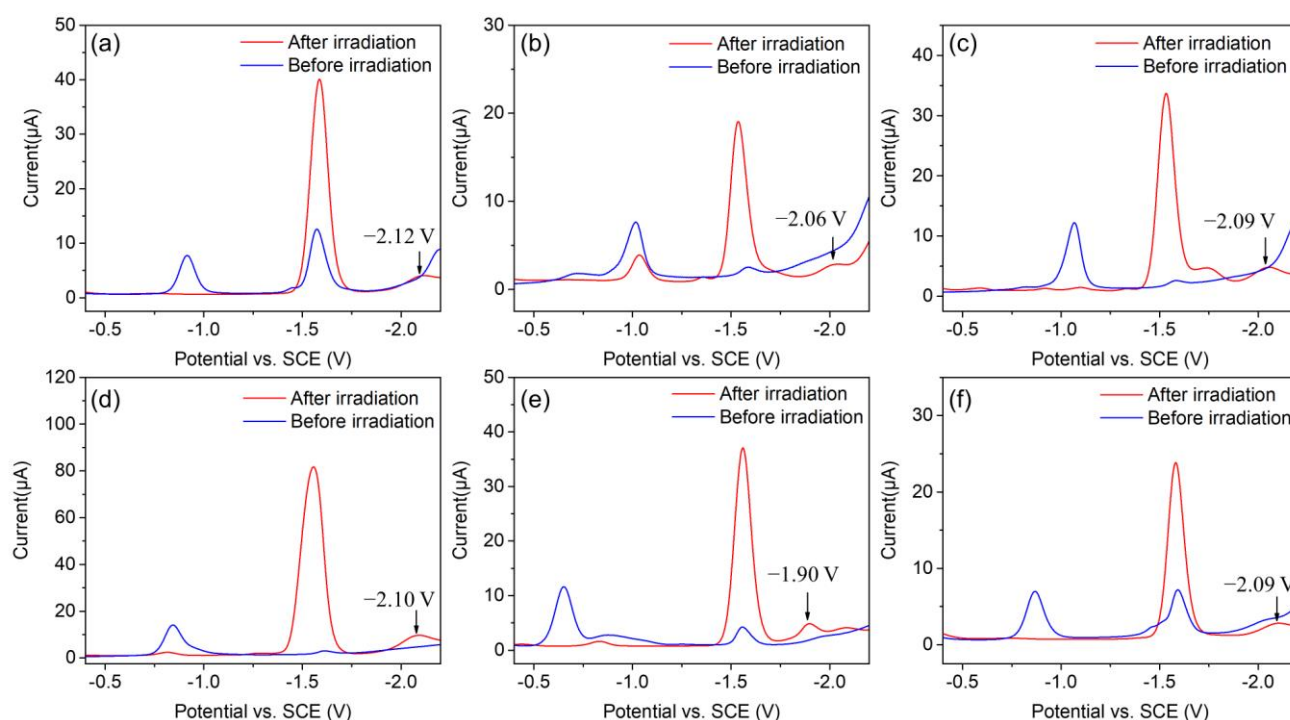

**Supplementary Figure 44. Electrochemical study.** SWVs of 0.3 mM (a) **1**; (b) **2**; (c) **3**; (d) **4**; (e) **5**; and (f) **6** with 10 mM BIH in  $\text{CO}_2$ -saturated 0.1 M TBAPF<sub>6</sub> DMF solutions before and after irradiation with a white LED ( $\lambda > 400$  nm,  $100$  mW/cm<sup>2</sup>) until the solution turning yellow. The peak at -1.6 V is consistent with a  $\text{BI}^+$  species. The experiments were conducted using a glassy carbon working electrode (3.0 mm in diameter), a Pt wire counter electrode, and a saturated calomel electrode (SCE) at a scan rate of  $100$  mV  $\cdot$  s<sup>-1</sup>. Source data are provided as a Source Data file.

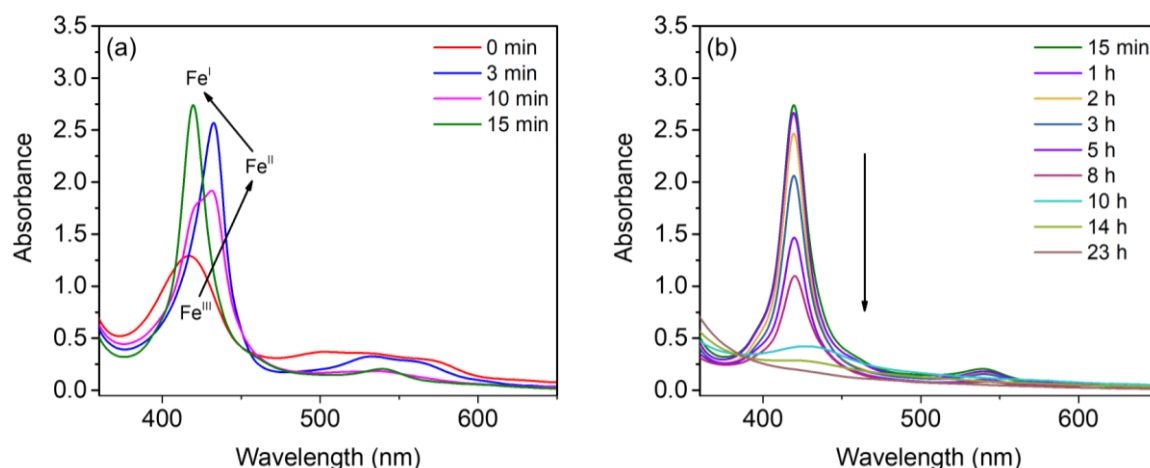

**Supplementary Figure 45. UV-vis absorption spectra.** UV-vis absorption spectra of systems containing 30 mM BIH, 20  $\mu\text{M}$  FeTDHPP, and 20  $\mu\text{M}$  **5** in  $\text{CO}_2$ -saturated DMF in a quartz cuvette (10-mm path length) at 298 K under irradiation with a white LED ( $\lambda > 400$  nm,  $100$  mW/cm<sup>2</sup>). Irradiation time ranging from 0 to 15 min (a), and from 15 min to 23 h (b).

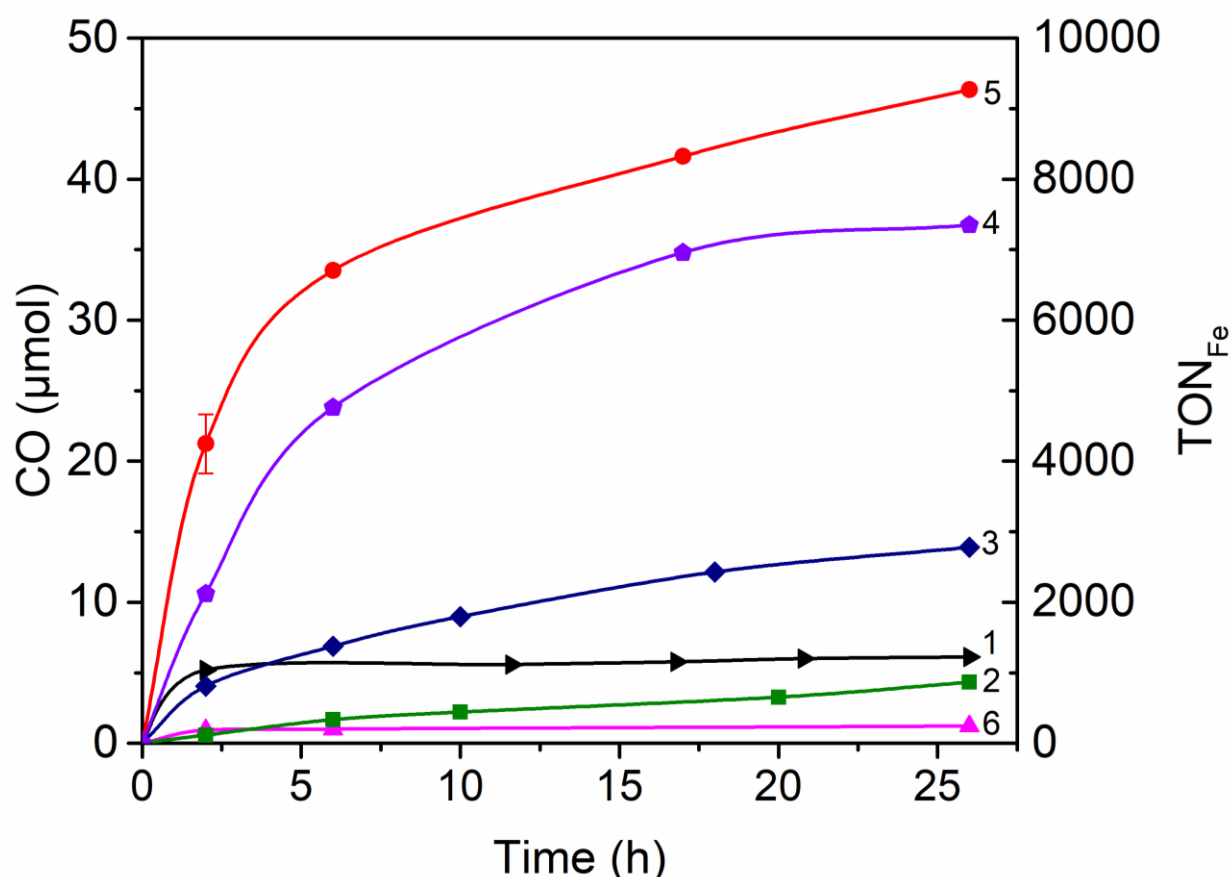

**Supplementary Figure 46. Photocatalytic  $\text{CO}_2$  reduction.** Experiments were performed in 5.0 mL  $\text{CO}_2$ -saturated DMF solution containing 10 mM BIH, 1.0  $\mu\text{M}$  FeTDHPP, and 20  $\mu\text{M}$  PSs **1-6** under irradiation with white LED light ( $\lambda > 400$  nm,  $100$  mW/cm<sup>2</sup>) at 298 K. The error bar denotes standard deviation, based on 3 separated runs. Source data are provided as a Source Data file.

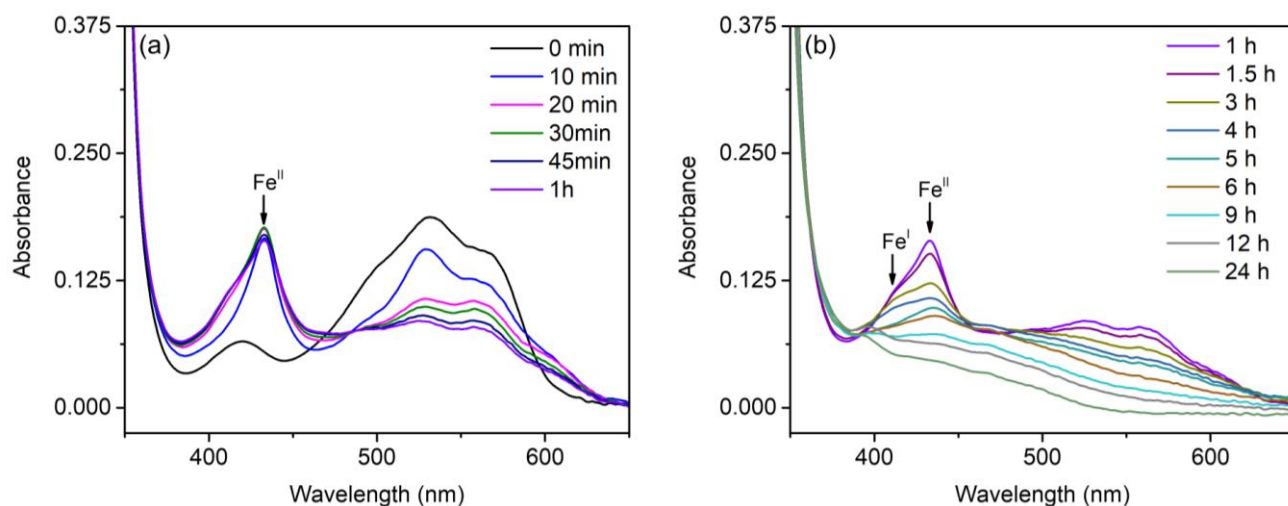

**Supplementary Figure 47. UV-vis absorption spectra.** UV-vis absorption spectra of systems containing 10 mM BIH, 1.0  $\mu\text{M}$  FeTDHPP, and 20  $\mu\text{M}$  **5** in  $\text{CO}_2$ -saturated DMF in a quartz cuvette (10-mm path length) at 298 K under irradiation with a 300 W Xe lamp equipped with a 550 nm cut-off filter ( $\lambda > 550$  nm). Irradiation time ranging from 0 to 1 h (a), and from 1 to 24 h (b).

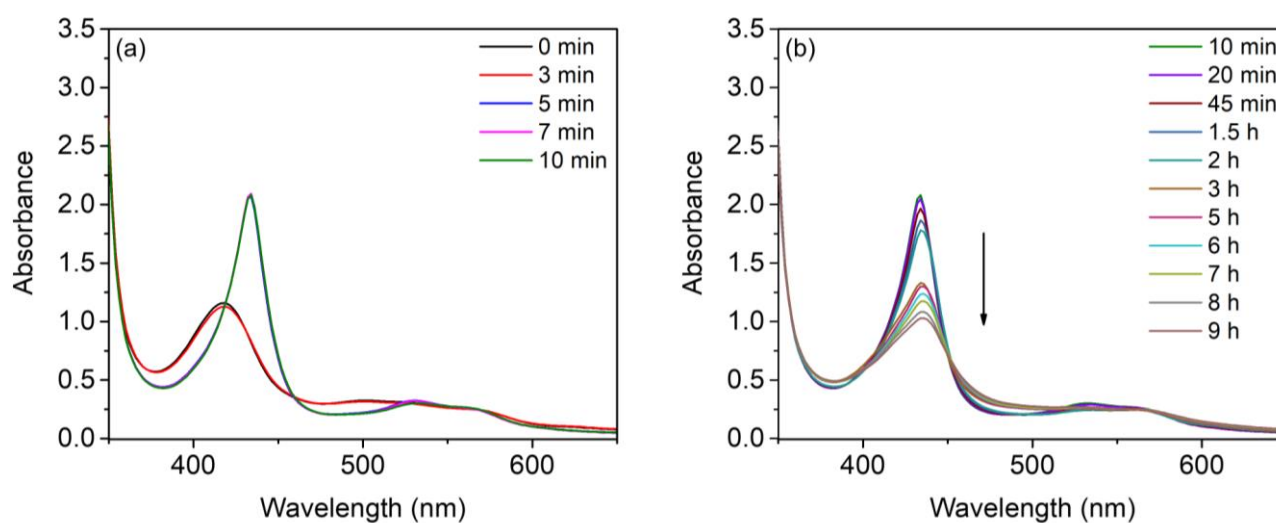

**Supplementary Figure 48. UV-vis absorption spectra.** UV-vis absorption spectra of systems containing 30 mM BIH, 20  $\mu\text{M}$  FeTDHPP, and 20  $\mu\text{M}$  **5** in  $\text{CO}_2$ -saturated DMF in a quartz cuvette (10-mm path length) at 298 K under irradiation with a 300 W Xe lamp equipped with a 550 nm cut-off filter ( $\lambda > 550$  nm). Irradiation time ranging from 0 to 10 min (a), and from 10 min to 9 h (b).

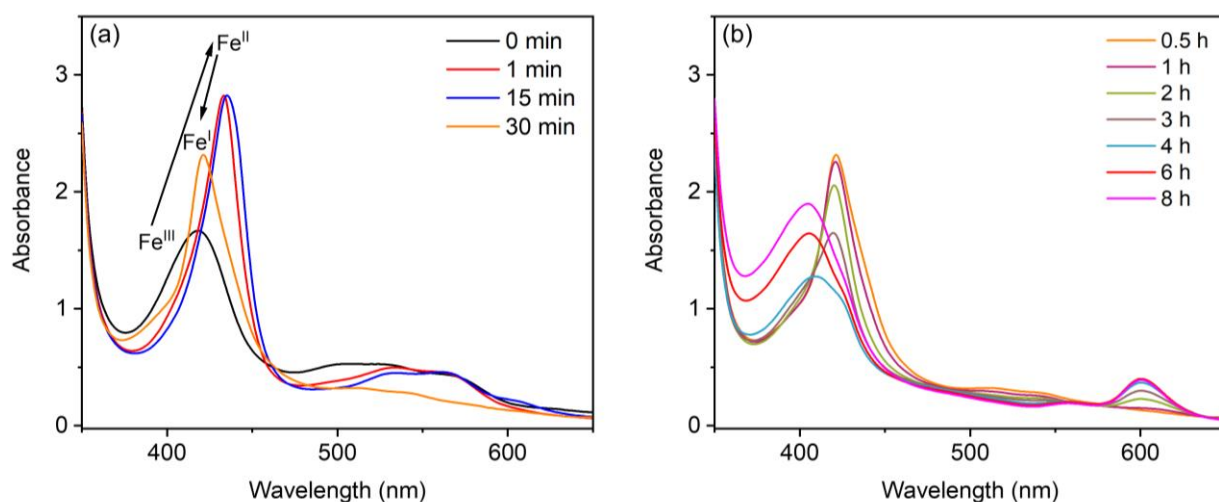

**Supplementary Figure 49. UV-vis absorption spectra.** Systems containing 30 mM BIH, 20  $\mu\text{M}$  FeTDHPP, and 20  $\mu\text{M}$  **5** in  $\text{CO}_2$ -saturated DMF in a quartz cuvette (10-mm path length) at 298 K under irradiation with a blue LED ( $\lambda = 450 \text{ nm}$ ,  $\Delta P \cdot \lambda = 12300 \text{ mW} \cdot \text{nm}/\text{cm}^2$ ). Irradiation time ranging from 0 to 30 min (a), and from 30 min to 8 h (b).

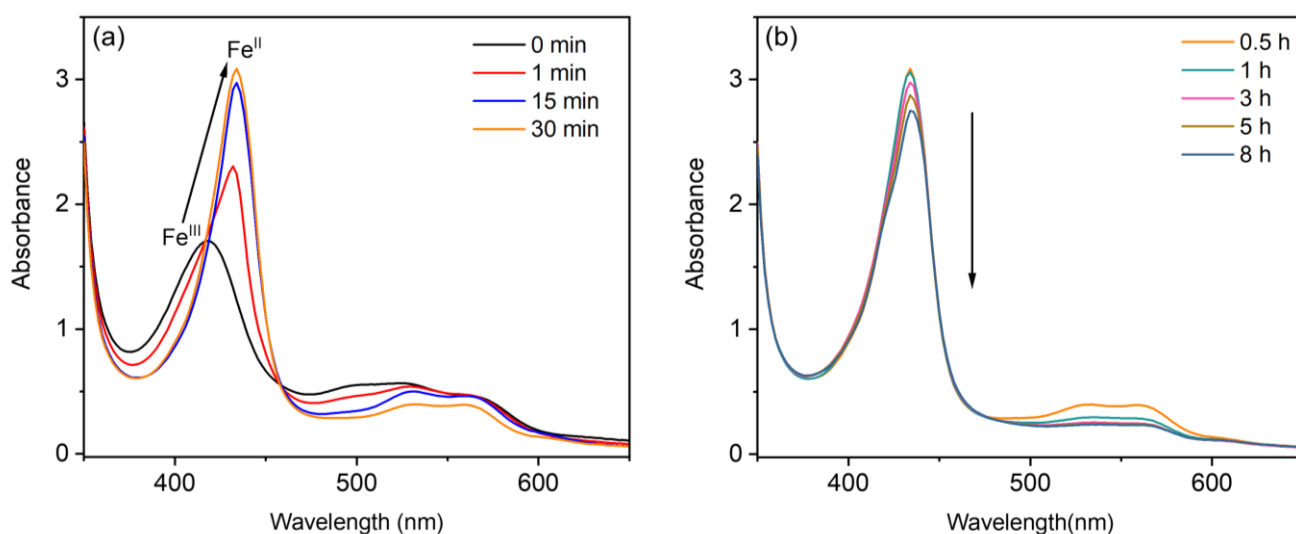

**Supplementary Figure 50. UV-vis absorption spectra.** Systems containing 30 mM BIH, 20  $\mu\text{M}$  FeTDHPP, and 20  $\mu\text{M}$  **5** in  $\text{CO}_2$ -saturated DMF in a quartz cuvette (10-mm path length) at 298 K under irradiation with a green LED ( $\lambda = 525 \text{ nm}$ ,  $\Delta P \cdot \lambda = 13203 \text{ mW} \cdot \text{nm}/\text{cm}^2$ ). Irradiation time ranging from 0 to 30 min (a), and from 30 min to 8 h (b).

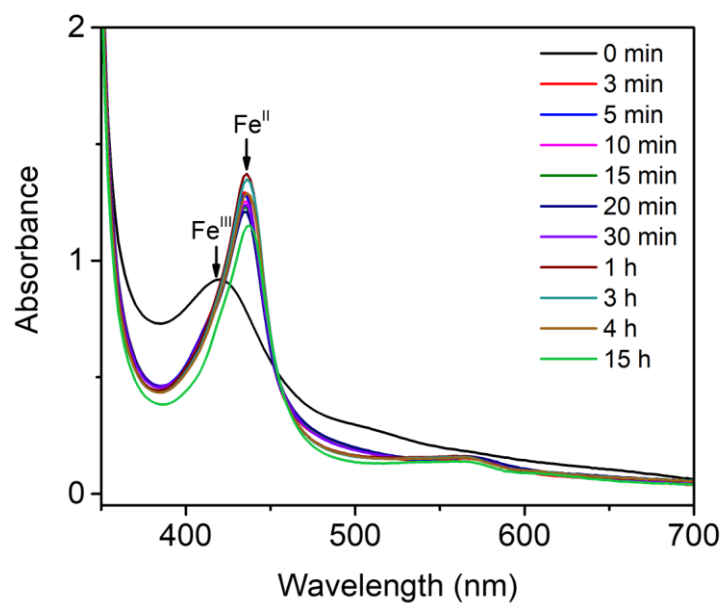

**Supplementary Figure 51. UV-vis absorption spectra.** UV-vis absorption spectra of systems containing 30 mM BIH and 20 μM FeTDHPP in DMF in a quartz cuvette (10-mm path length) at 298 K under irradiation with a white LED ( $\lambda > 400$  nm, 100 mW/cm<sup>2</sup>) for 15 h.



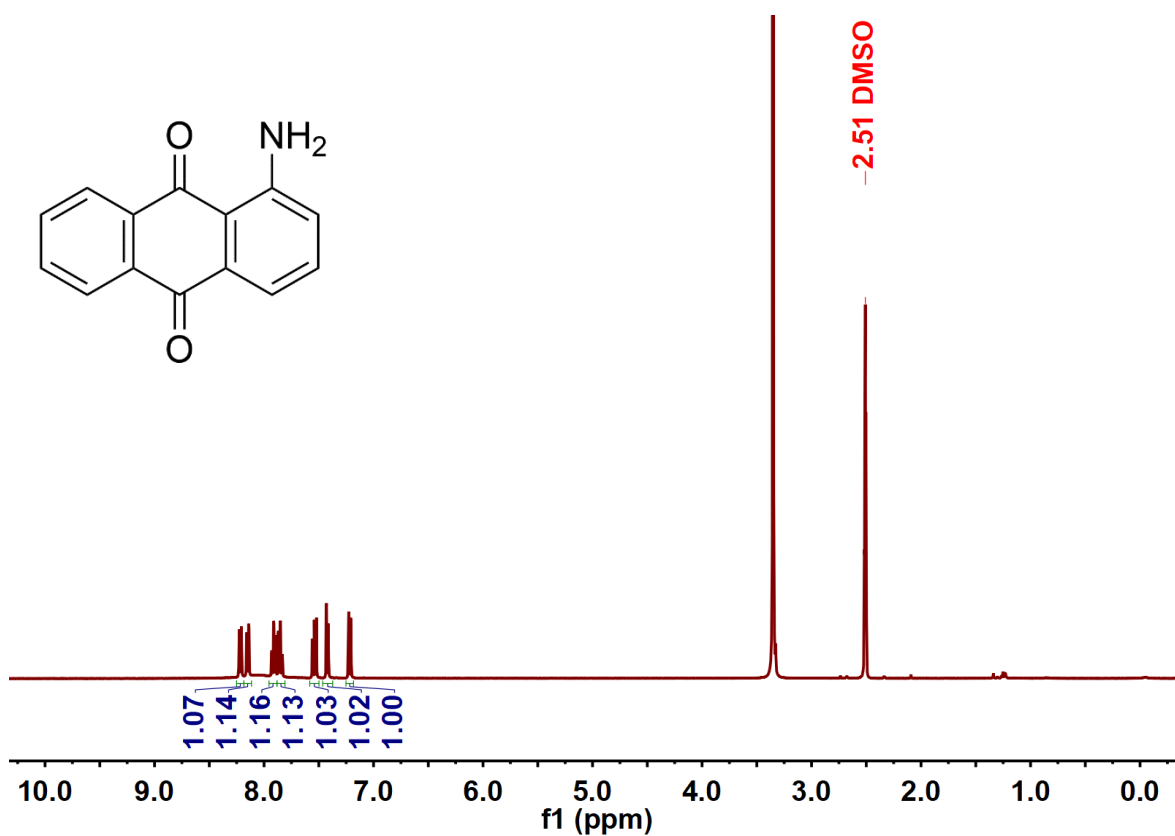

**Supplementary Figure 52. <sup>1</sup>H NMR spectrum.** <sup>1</sup>H NMR (400 MHz, 298 K) spectrum of PS 1 in *d*<sub>6</sub>-DMSO.

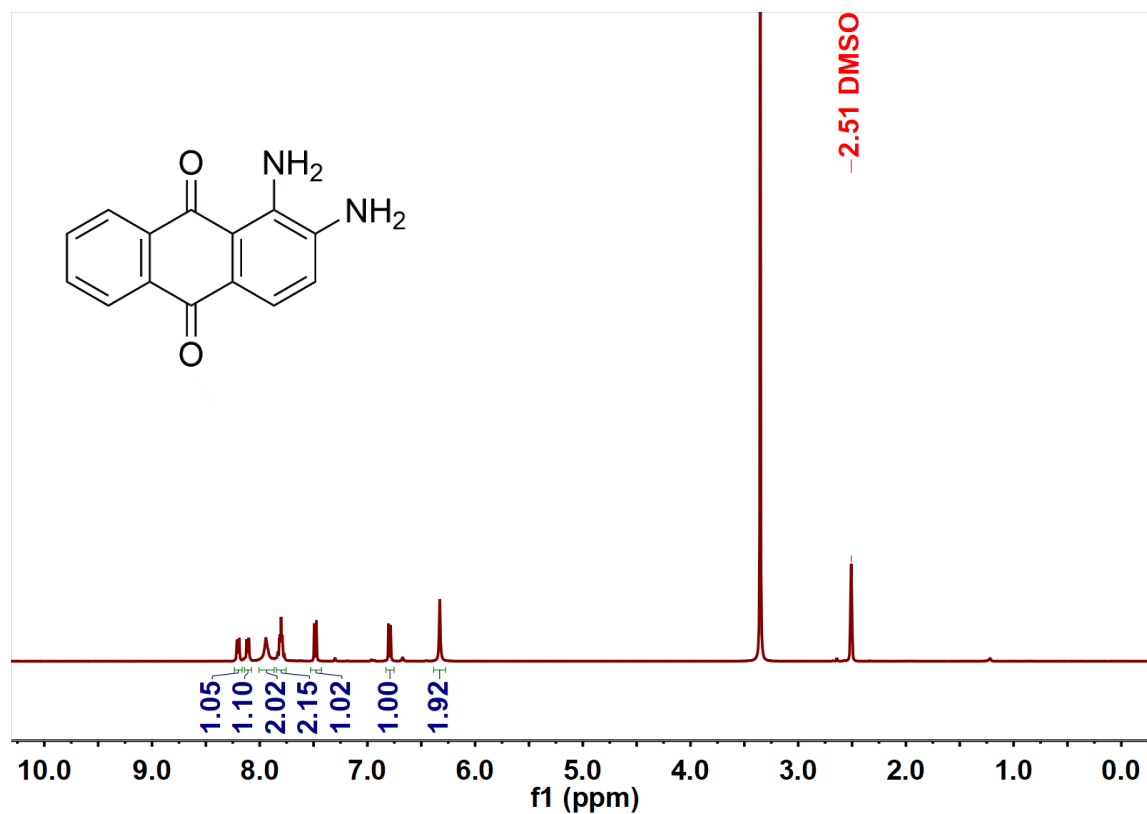

**Supplementary Figure 53. <sup>1</sup>H NMR spectrum.** <sup>1</sup>H NMR (400 MHz, 298 K) spectrum of PS 2 in *d*<sub>6</sub>-DMSO.

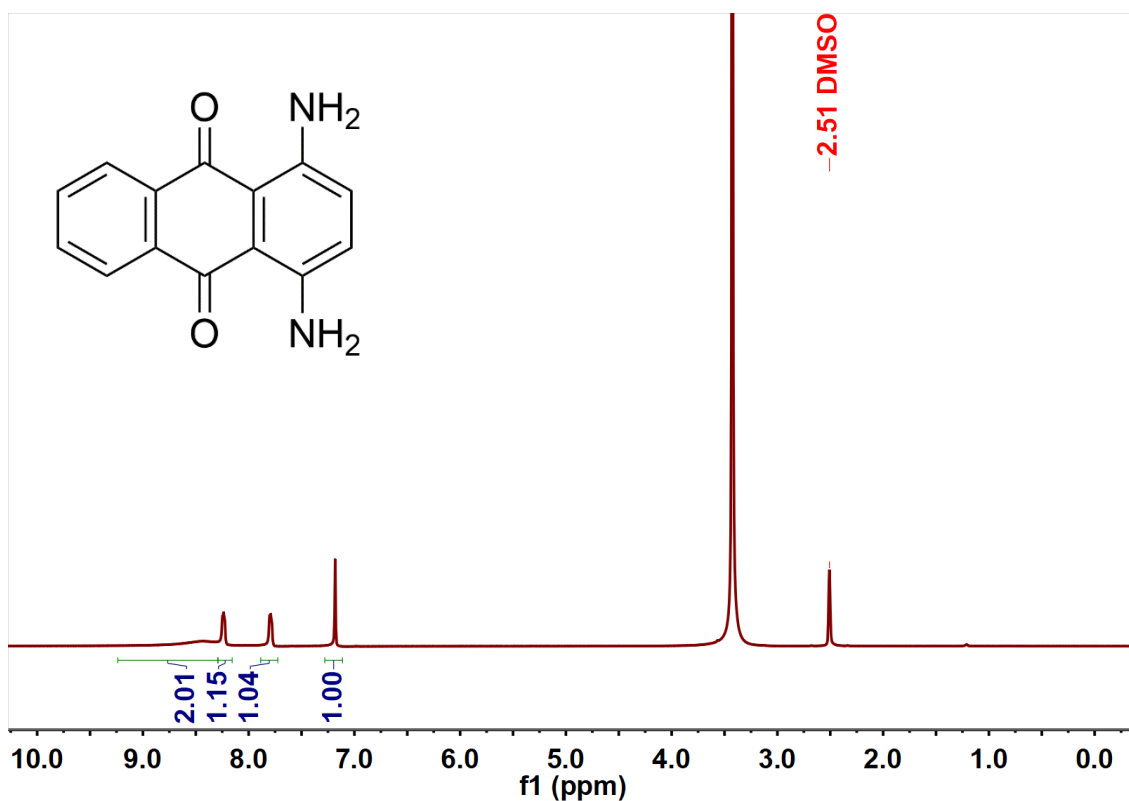

**Supplementary Figure 54. <sup>1</sup>H NMR spectrum.** <sup>1</sup>H NMR (400 MHz, 298 K) spectrum of PS 3 in *d*<sub>6</sub>-DMSO.

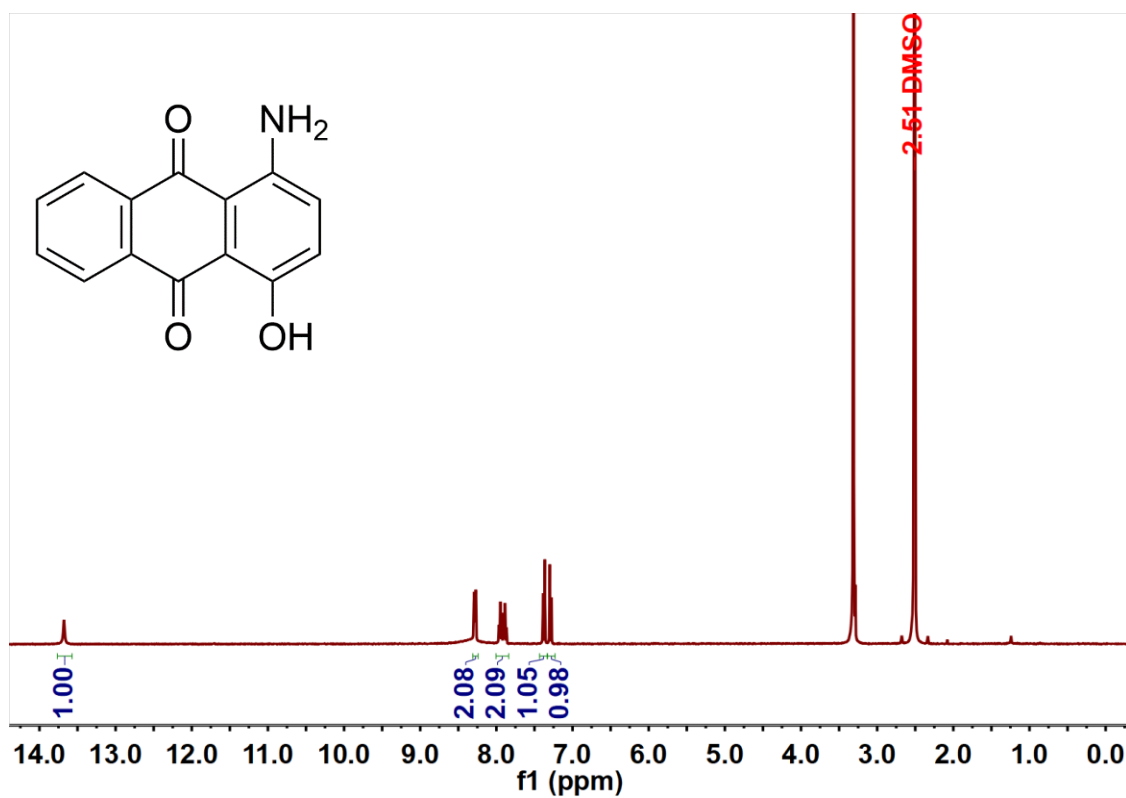

**Supplementary Figure 55. <sup>1</sup>H NMR spectrum.** <sup>1</sup>H NMR (400 MHz, 298 K) spectrum of PS 4 in *d*<sub>6</sub>-DMSO.

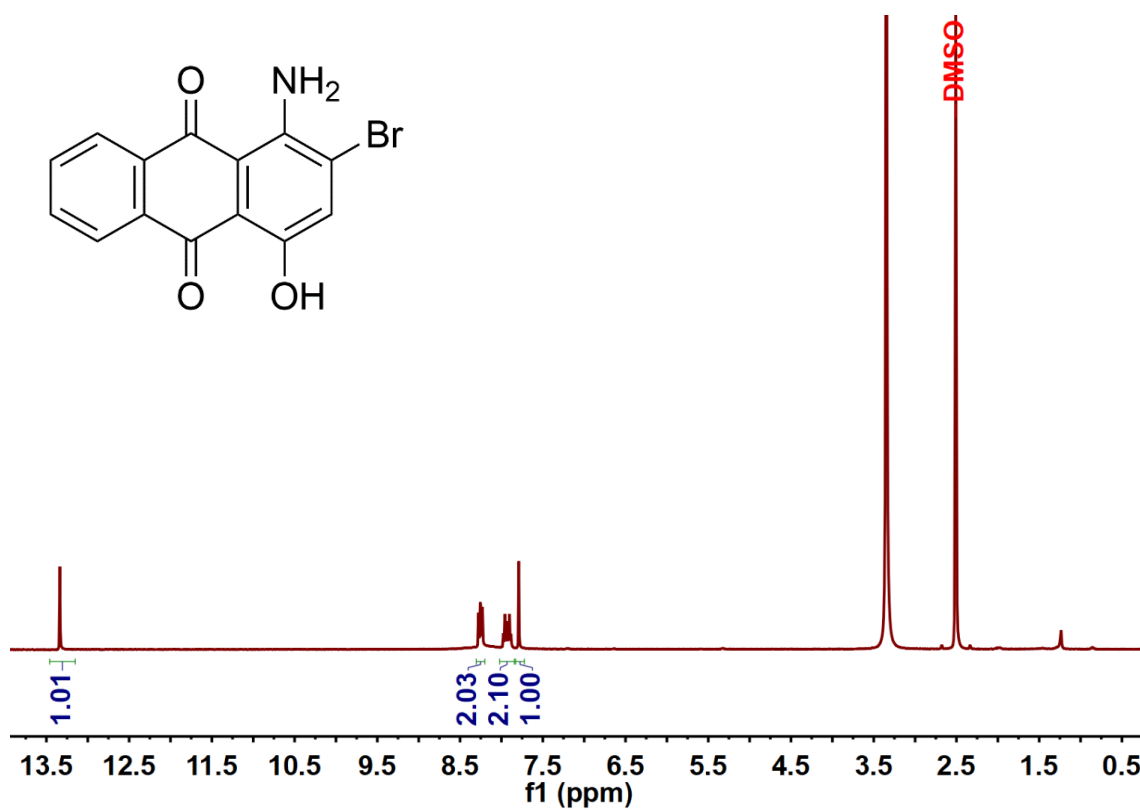

Supplementary Figure 56.  $^1\text{H}$  NMR spectrum.  $^1\text{H}$  NMR (400 MHz, 298 K) spectrum of PS 5 in  $d_6$ -DMSO.

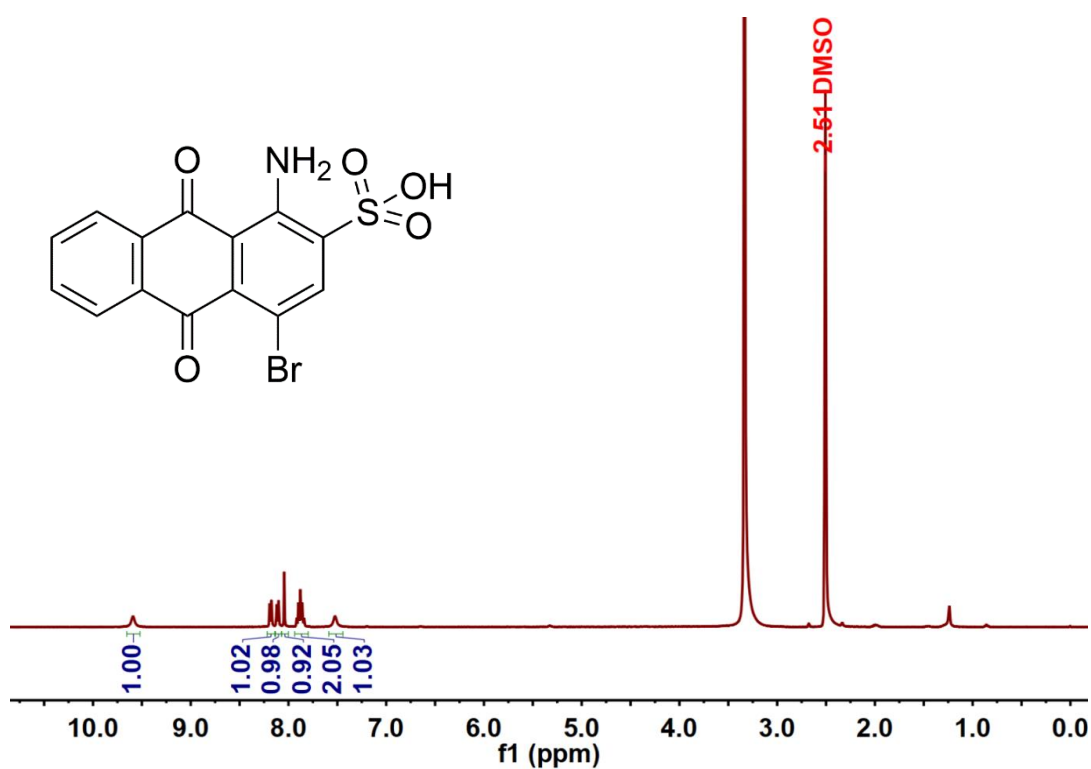

Supplementary Figure 57.  $^1\text{H}$  NMR spectrum.  $^1\text{H}$  NMR (400 MHz, 298 K) spectrum of PS 6 in  $d_6$ -DMSO.

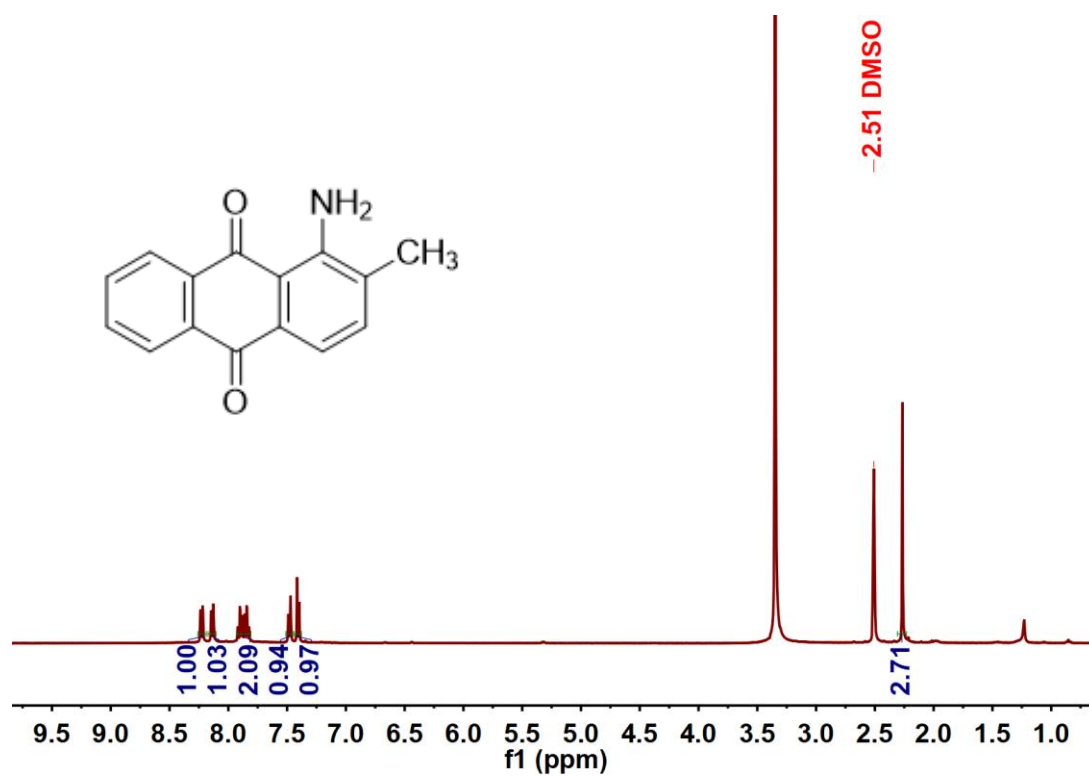

**Supplementary Figure 58.  $^1\text{H}$  NMR spectrum.**  $^1\text{H}$  NMR (400 MHz, 298 K) spectrum of 1-amino-2-methylantraquinone in  $d_6$ -DMSO.

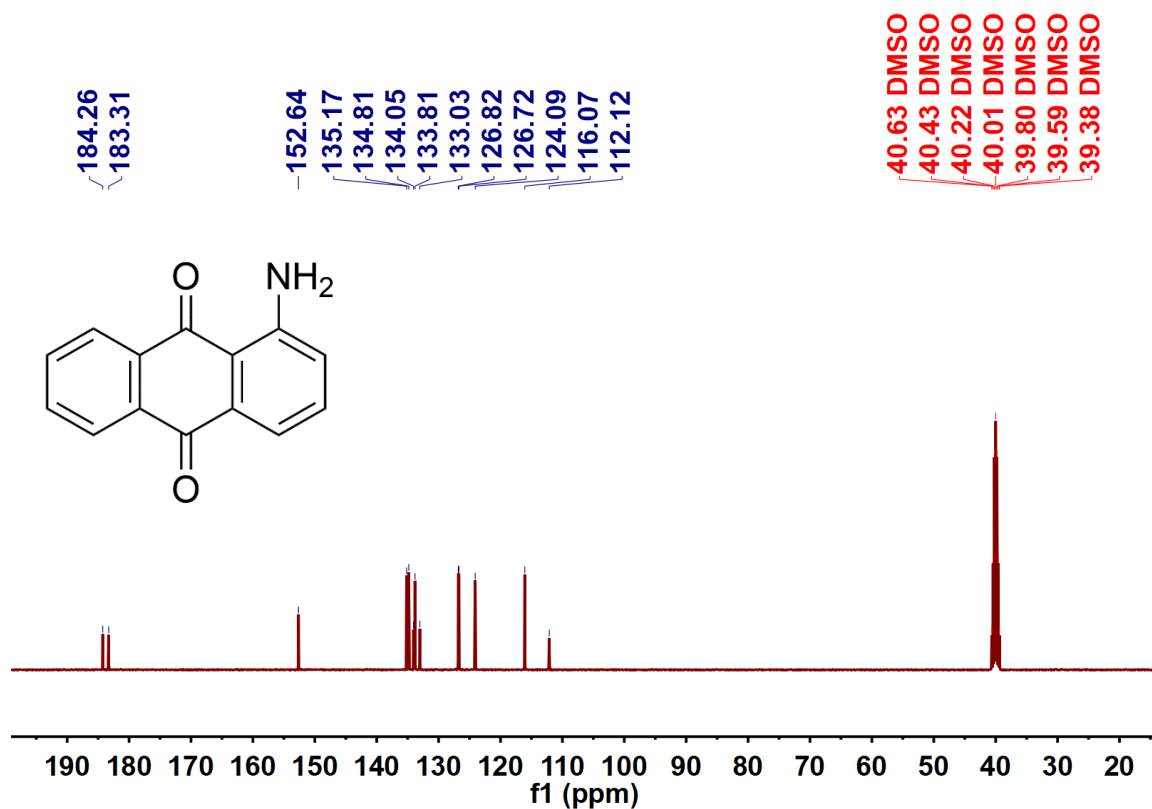

**Supplementary Figure 59.  $^{13}\text{C}$  NMR spectrum.**  $^{13}\text{C}$  NMR (100 MHz, 298 K) spectrum of PS 1 in  $d_6$ -DMSO.

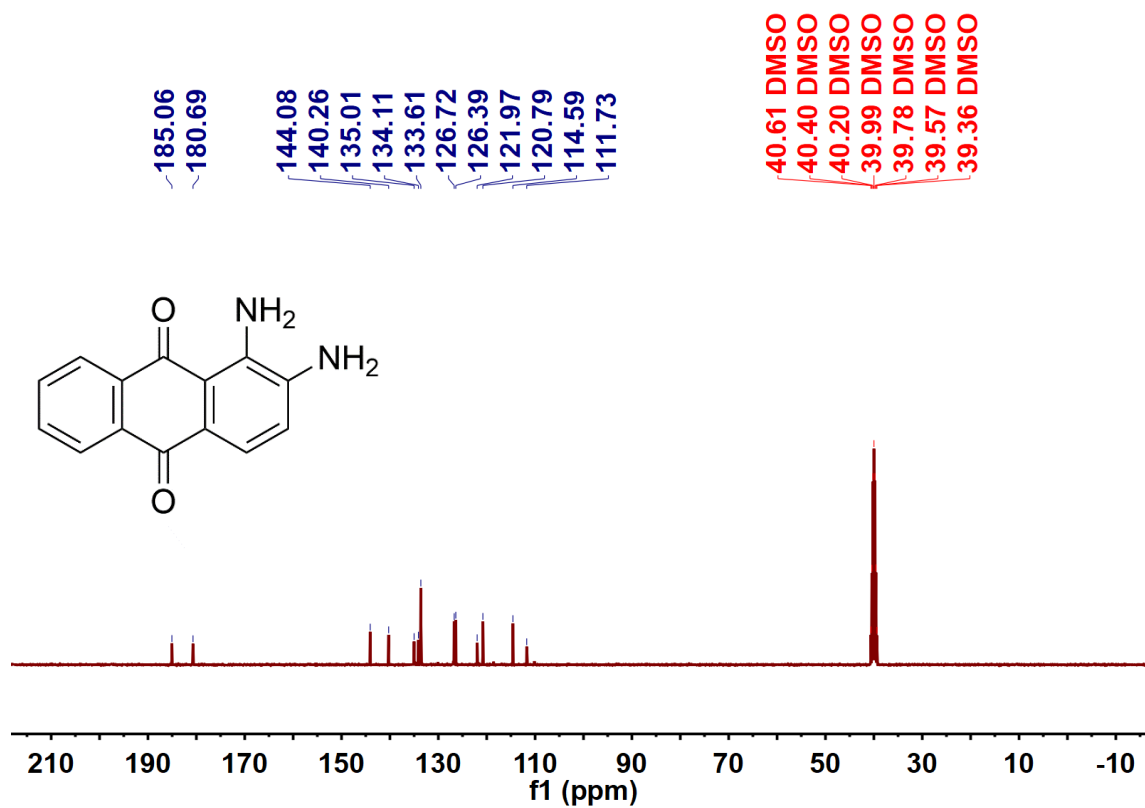

**Supplementary Figure 60.  $^{13}\text{C}$  NMR spectrum.**  $^{13}\text{C}$  NMR (100 MHz, 298 K) spectrum of PS 2 in  $d_6$ -DMSO.

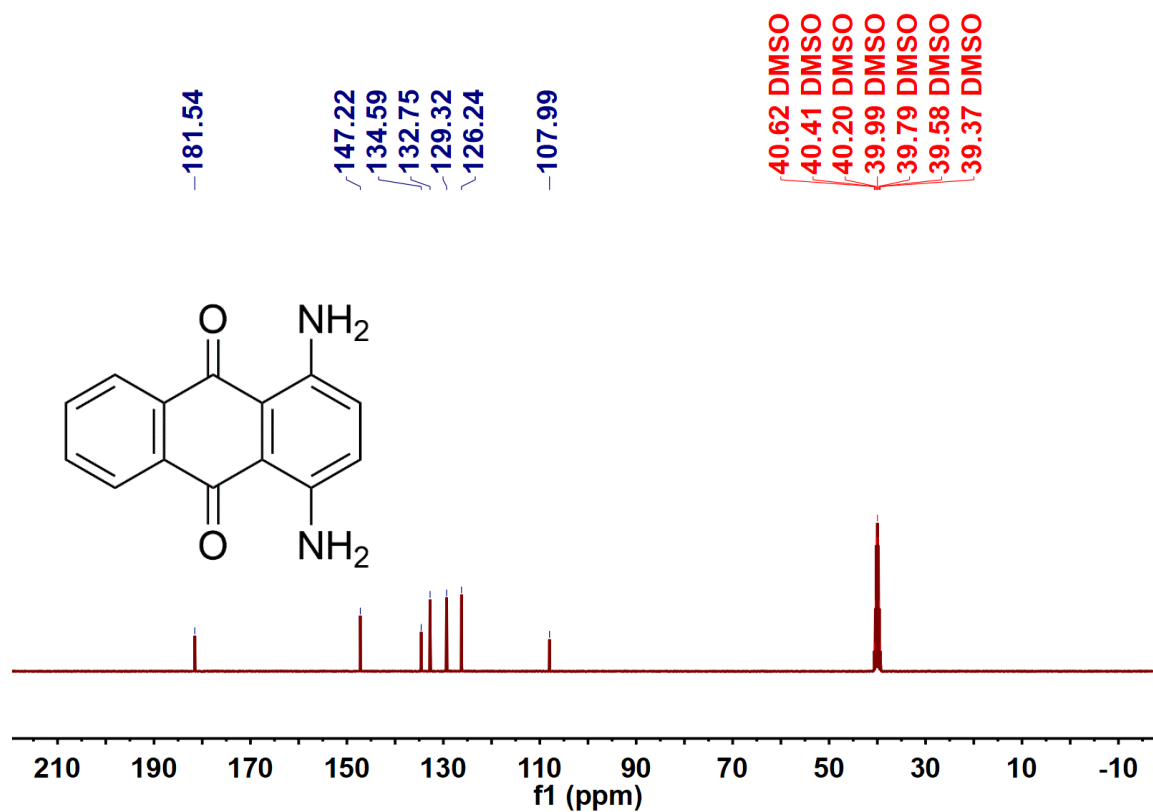

Supplementary Figure 61.  $^{13}\text{C}$  NMR spectrum.  $^{13}\text{C}$  NMR (100 MHz, 298 K) spectrum of PS 3 in  $d_6$ -DMSO.

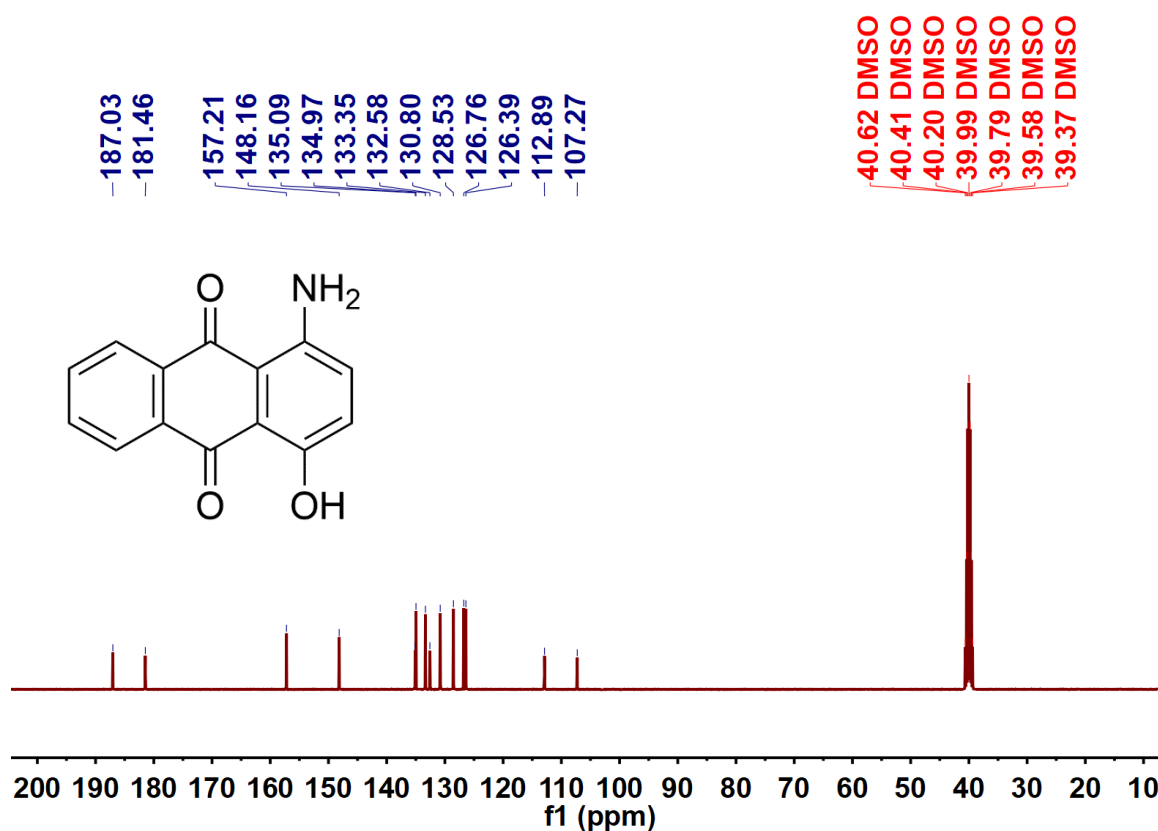

Supplementary Figure 62.  $^{13}\text{C}$  NMR spectrum.  $^{13}\text{C}$  NMR (100 MHz, 298 K) spectrum of PS 4 in  $d_6$ -DMSO.

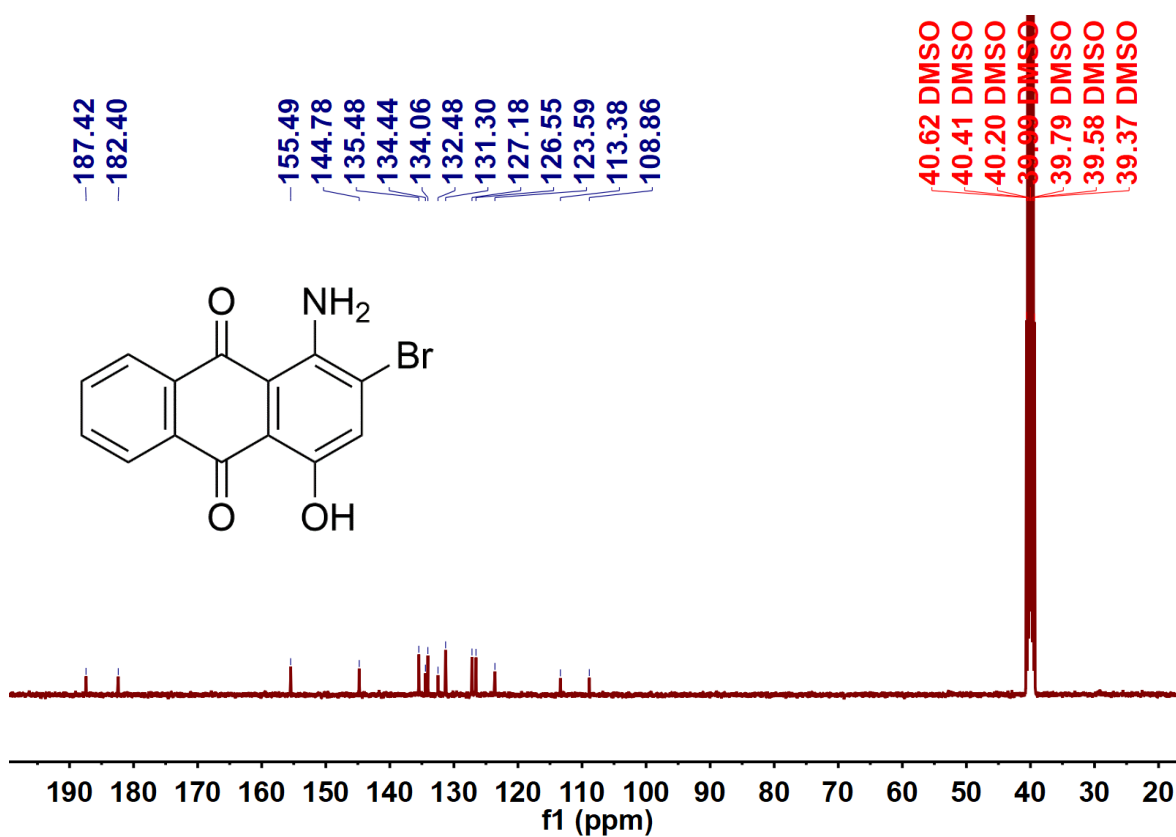

Supplementary Figure 63.  $^{13}\text{C}$  NMR spectrum.  $^{13}\text{C}$  NMR (100 MHz, 298 K) spectrum of PS 5 in  $d_6$ -DMSO.

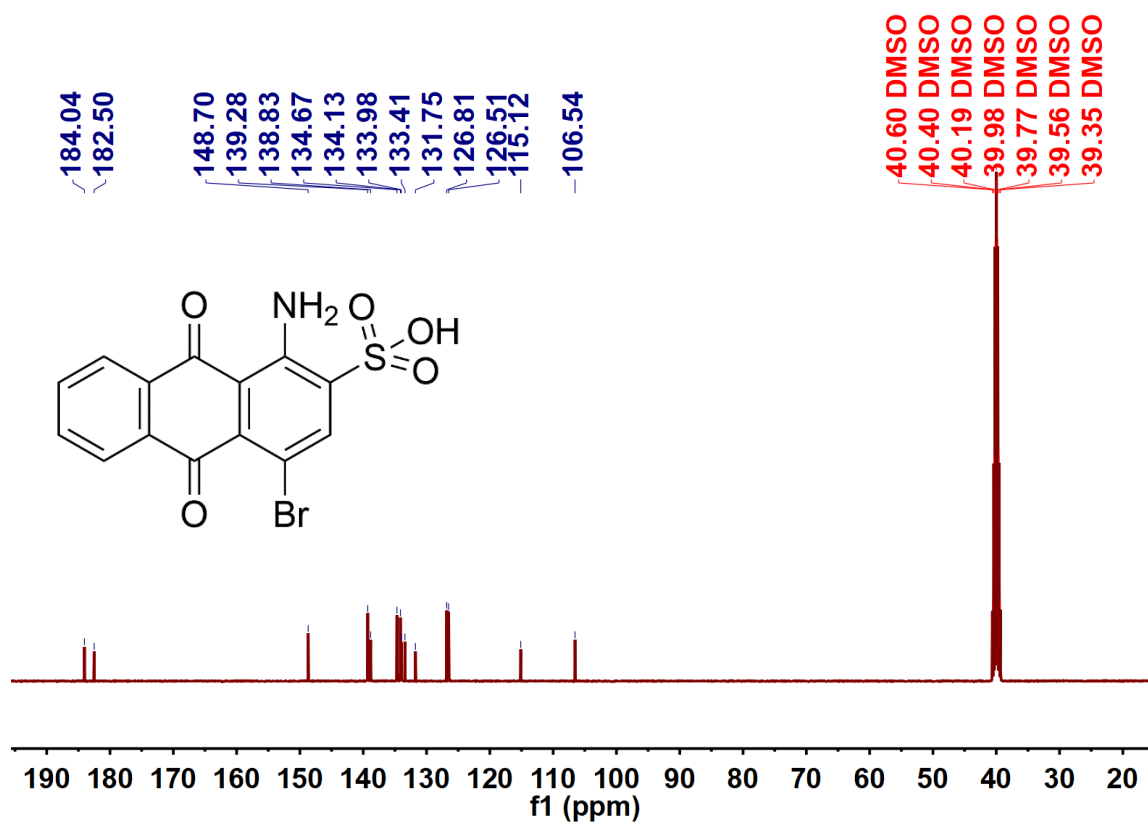

Supplementary Figure 64.  $^{13}\text{C}$  NMR spectrum.  $^{13}\text{C}$  NMR (100 MHz, 298 K) spectrum of PS 6 in  $d_6$ -DMSO.

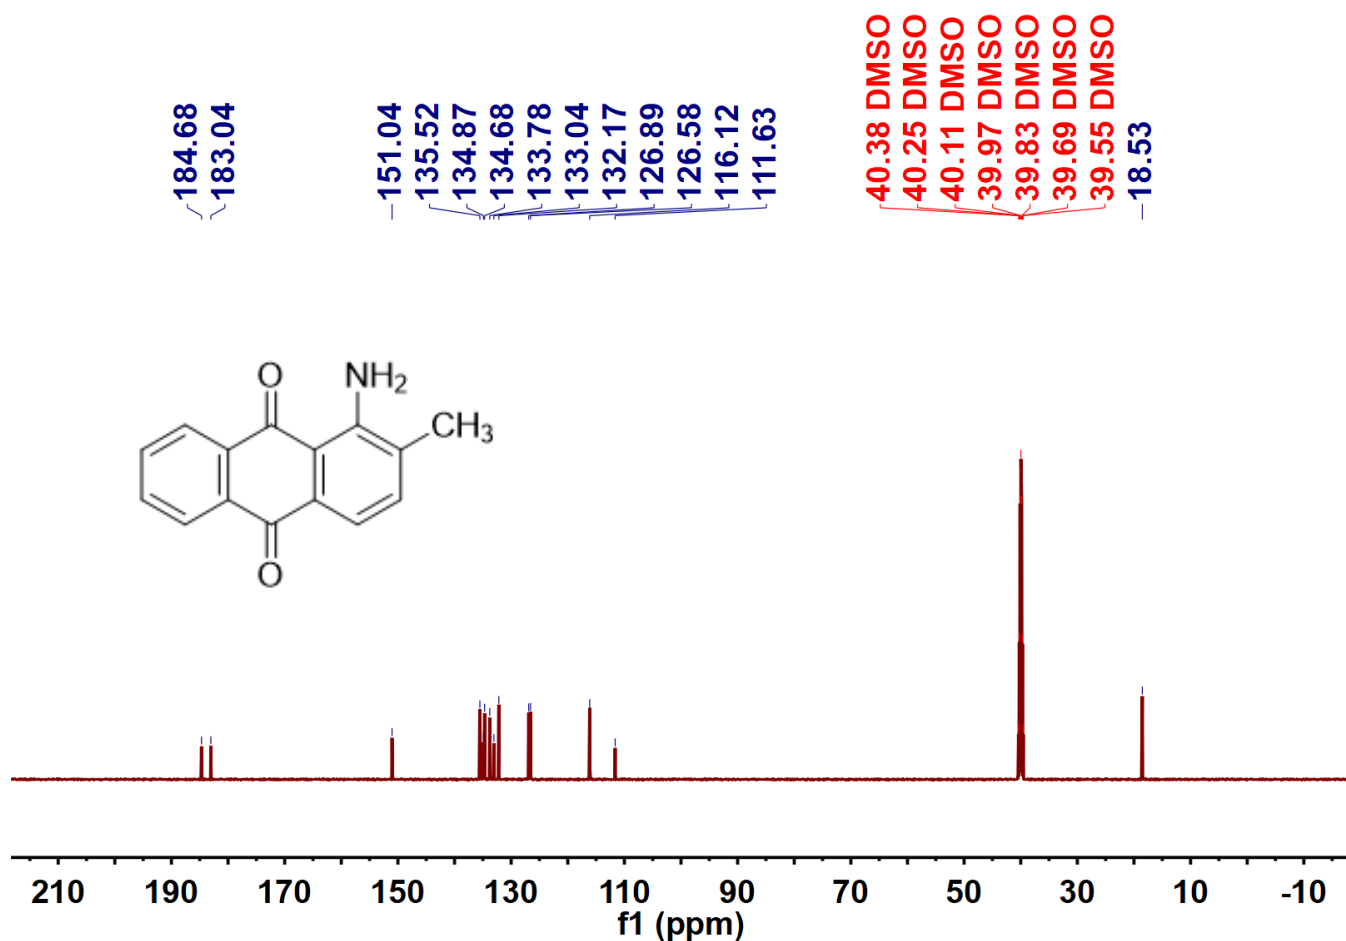

**Supplementary Figure 65.**  $^{13}\text{C}$  NMR spectrum.  $^{13}\text{C}$  NMR (100 MHz, 298 K) spectrum of 1-amino-2-methylantraquinone in  $d_6$ -DMSO.



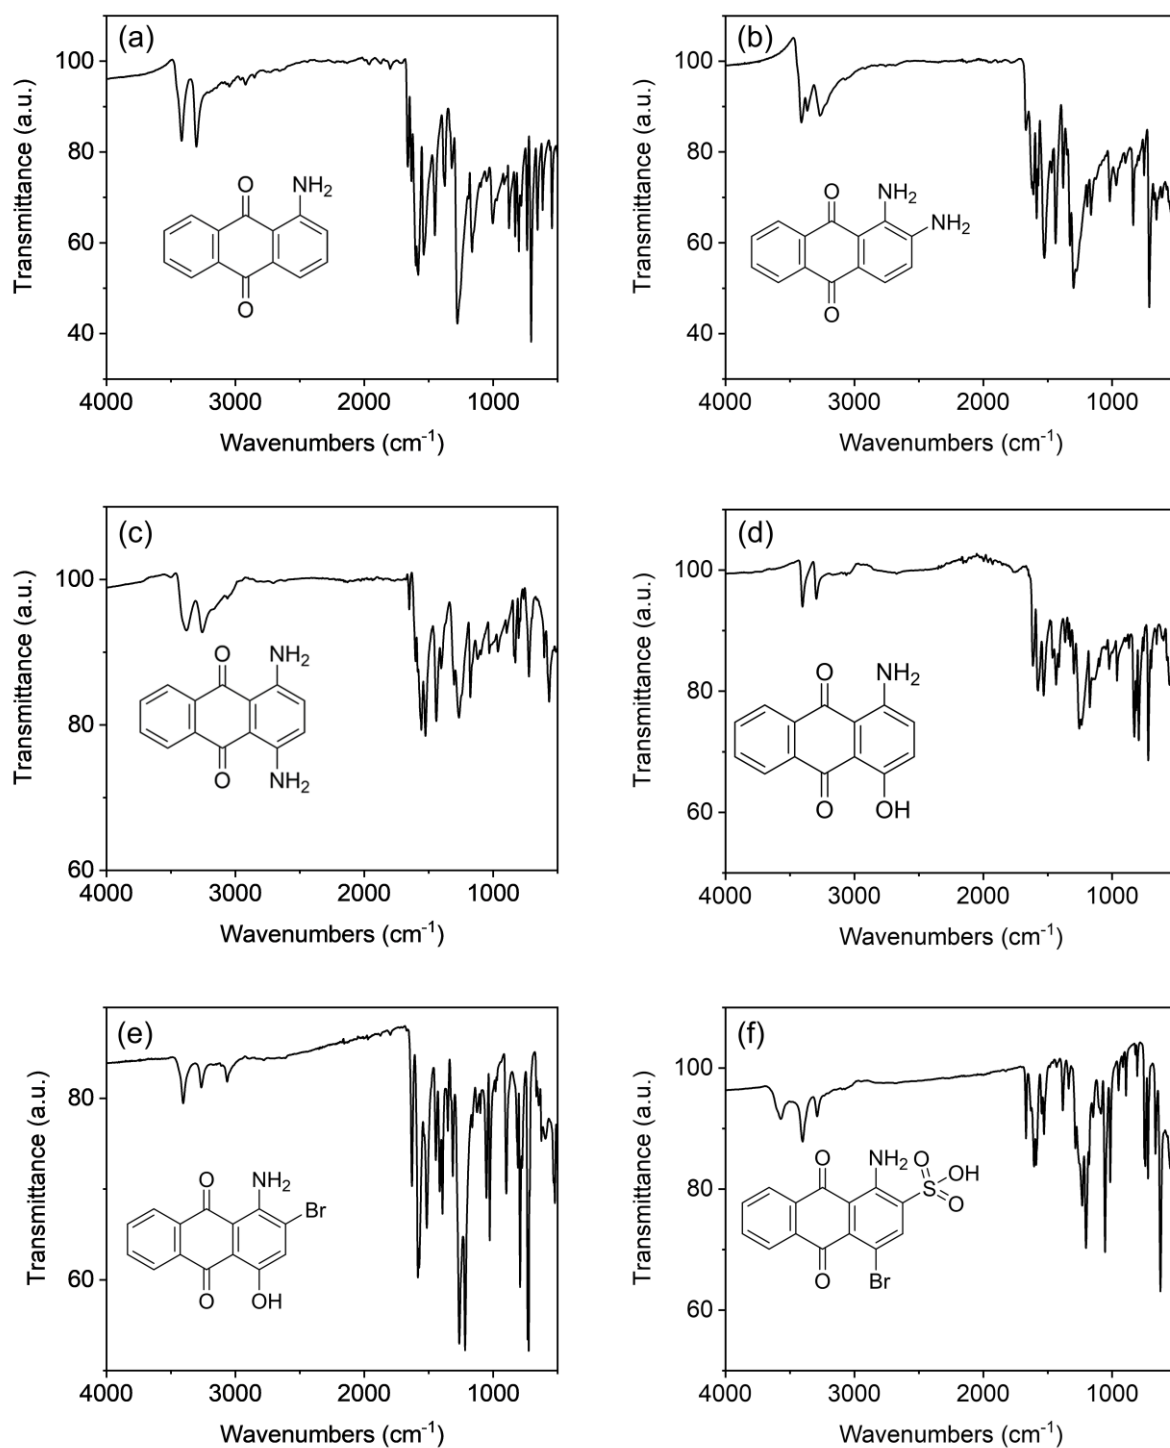

**Supplementary Figure 66. FT-IR spectra.** FT-IR spectra of (a) **1**; (b) **2**; (c) **3**; (d) **4**; (e) **5**; and (f) **6** at 298 K. Source data are provided as a Source Data file.

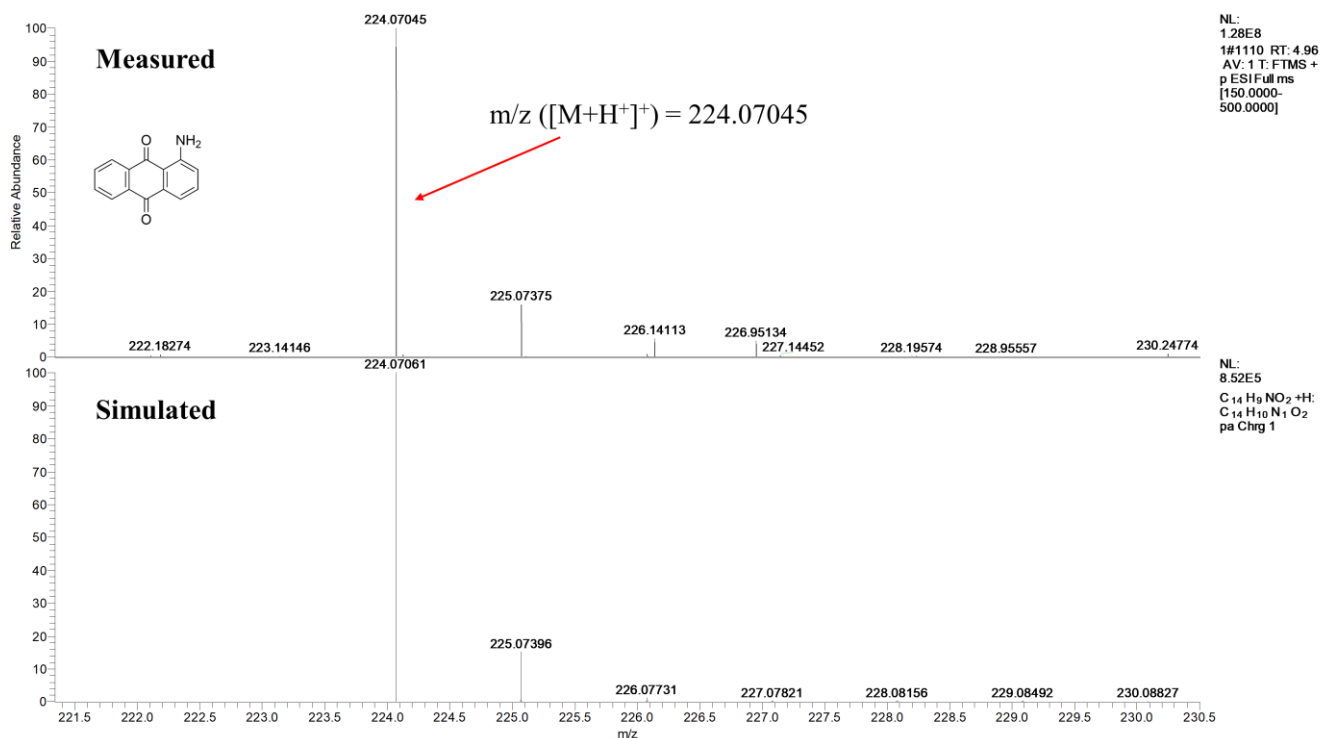

**Supplementary Figure 67. HRMS spectrum.** HRMS spectrum of PS 1 in CH<sub>3</sub>OH (positive ion mode).

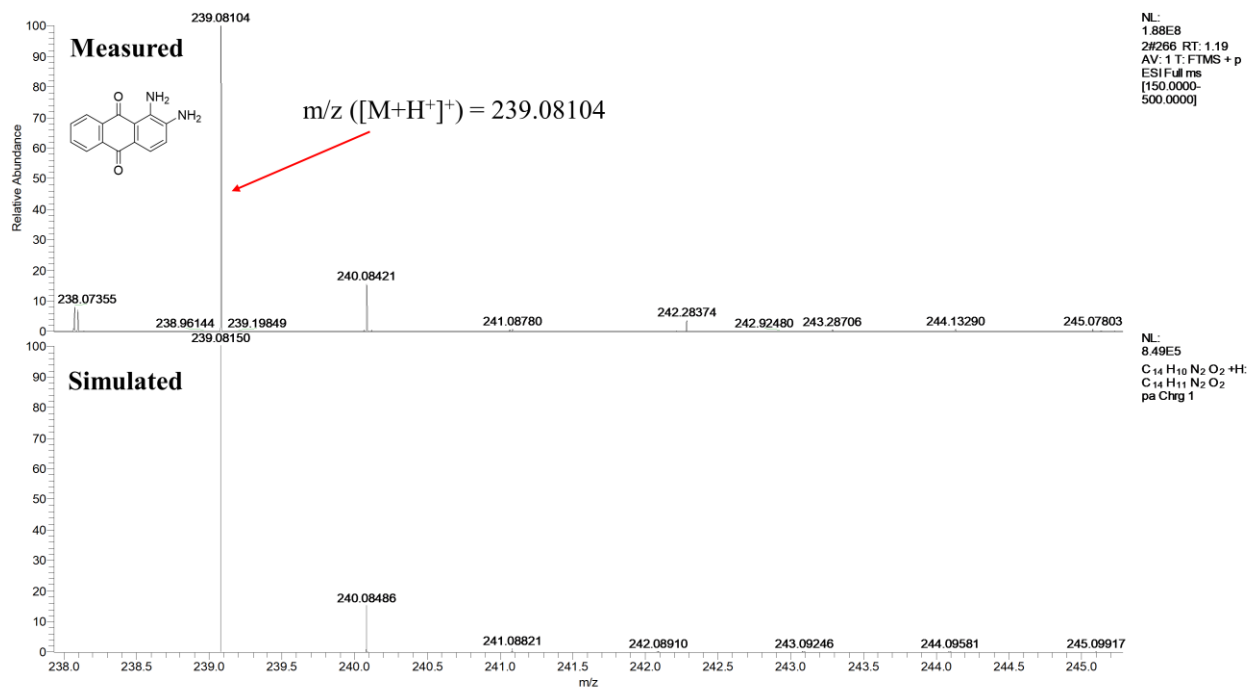

**Supplementary Figure 68. HRMS spectrum.** HRMS spectrum of PS 2 in CH<sub>3</sub>OH (positive ion mode).

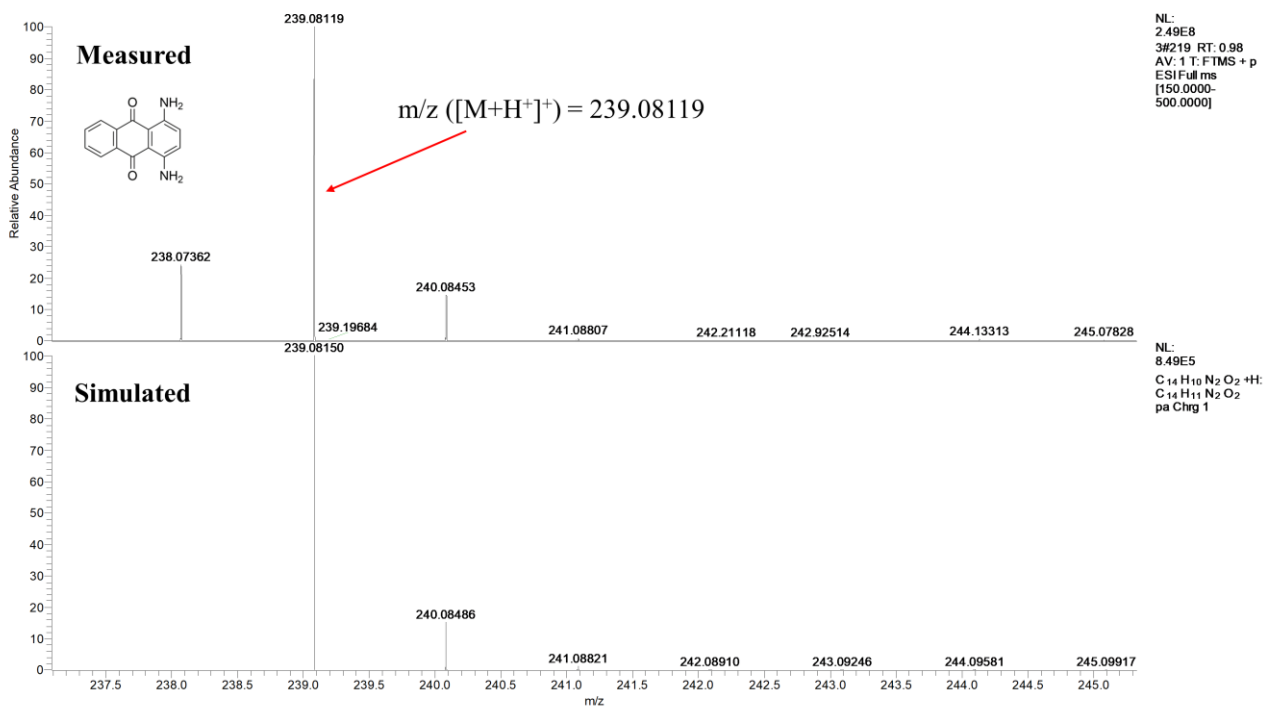

**Supplementary Figure 69. HRMS spectrum.** HRMS spectrum of PS 3 in CH<sub>3</sub>OH (positive ion mode).

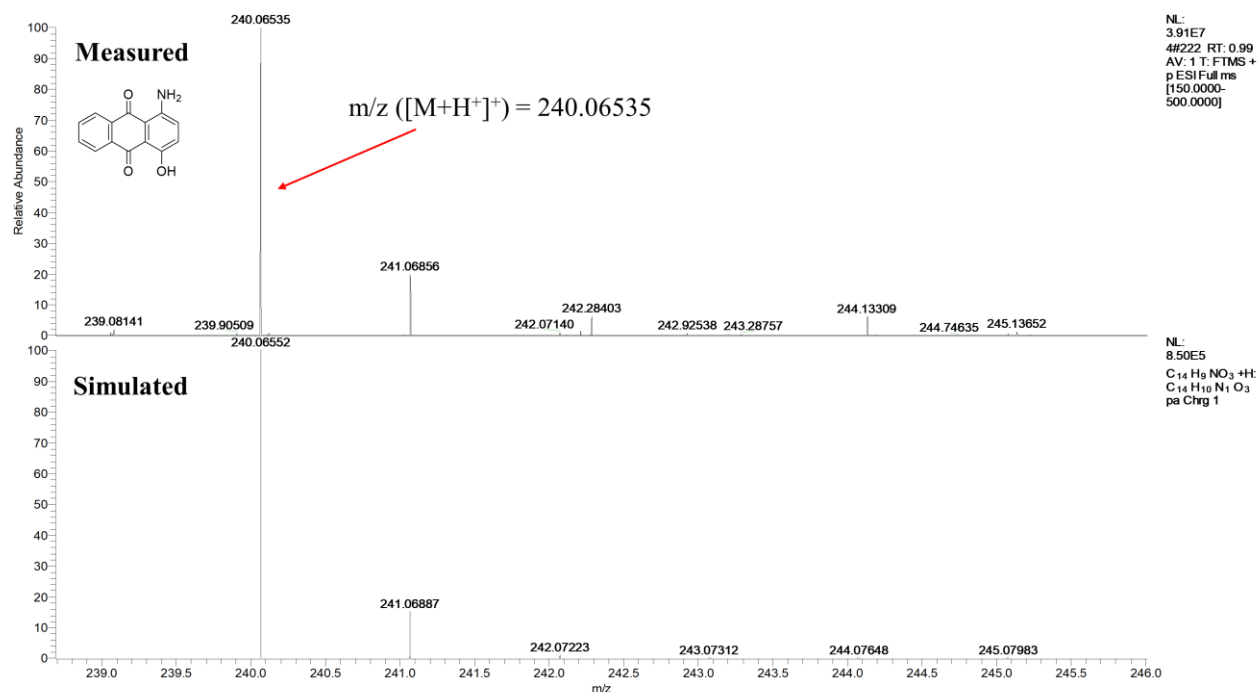

**Supplementary Figure 70. HRMS spectrum.** HRMS spectrum of PS 4 in CH<sub>3</sub>OH (positive ion mode).

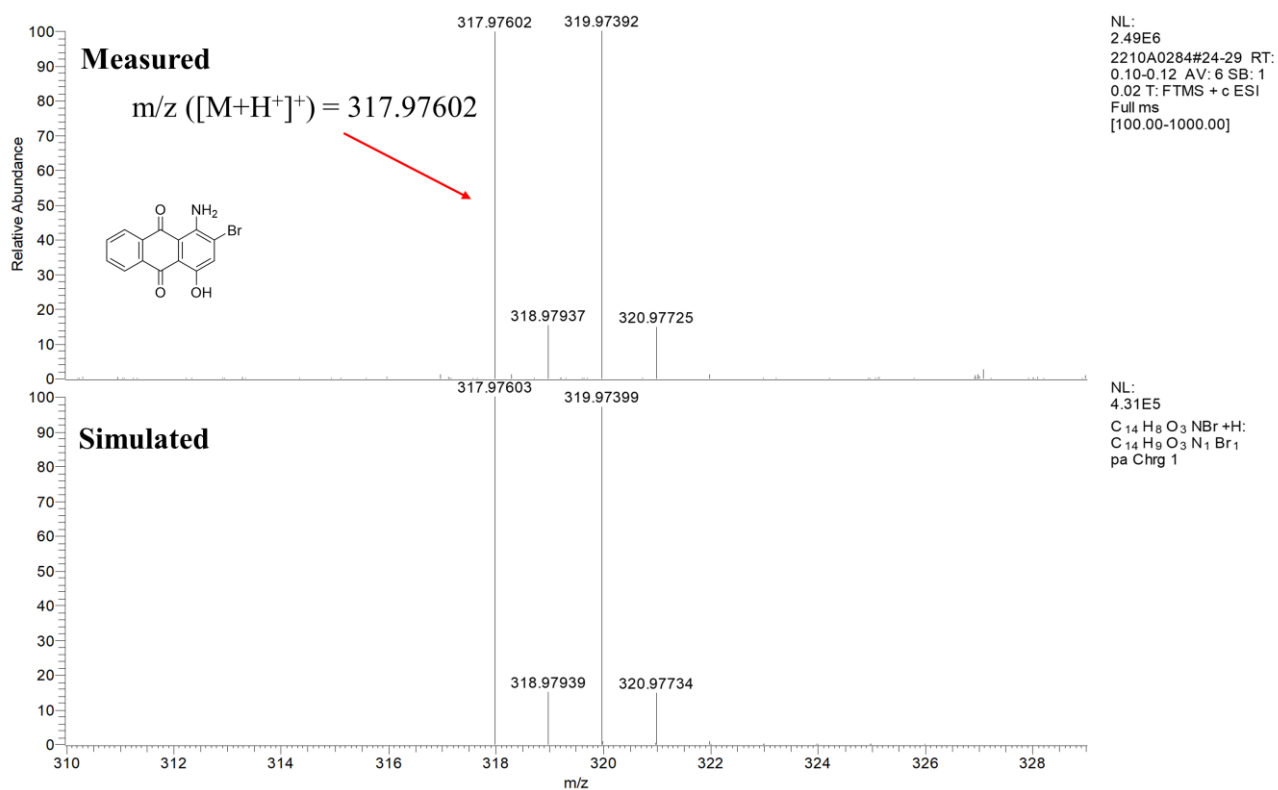

**Supplementary Figure 71. HRMS spectrum.** HRMS spectrum of PS 5 in CH<sub>3</sub>OH (positive ion mode).

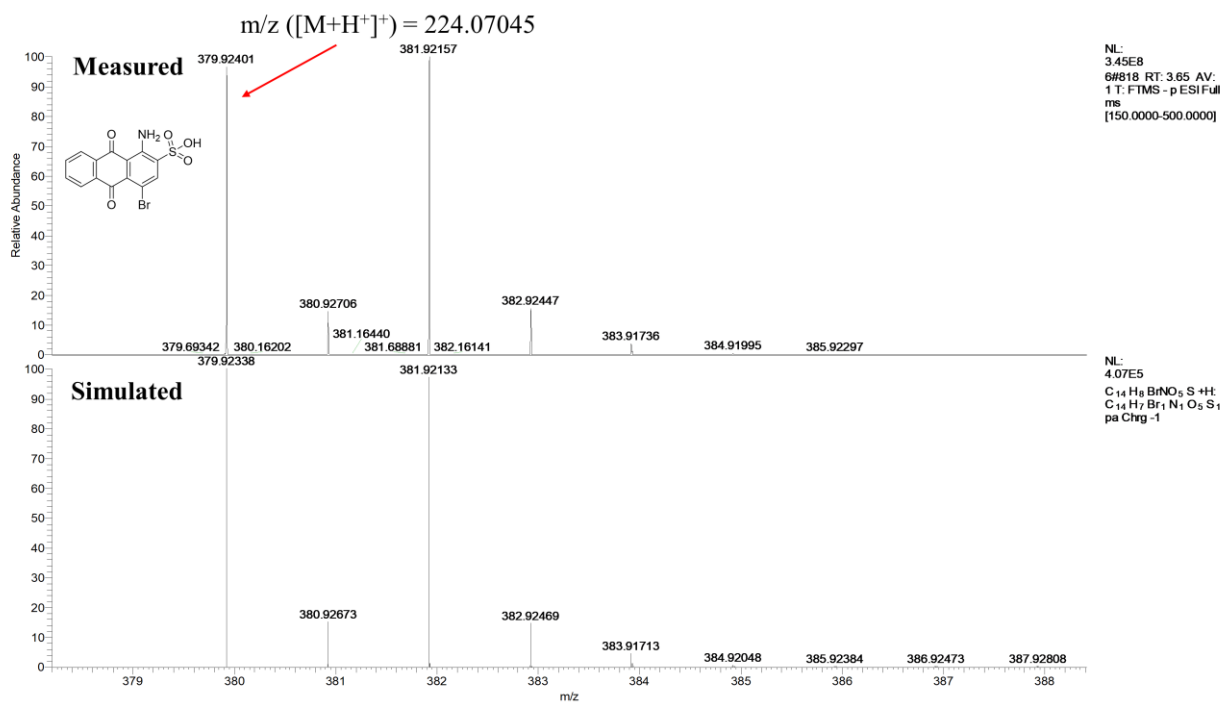

**Supplementary Figure 72. HRMS spectrum.** HRMS spectrum of PS 1 in CH<sub>3</sub>OH (negative ion mode).

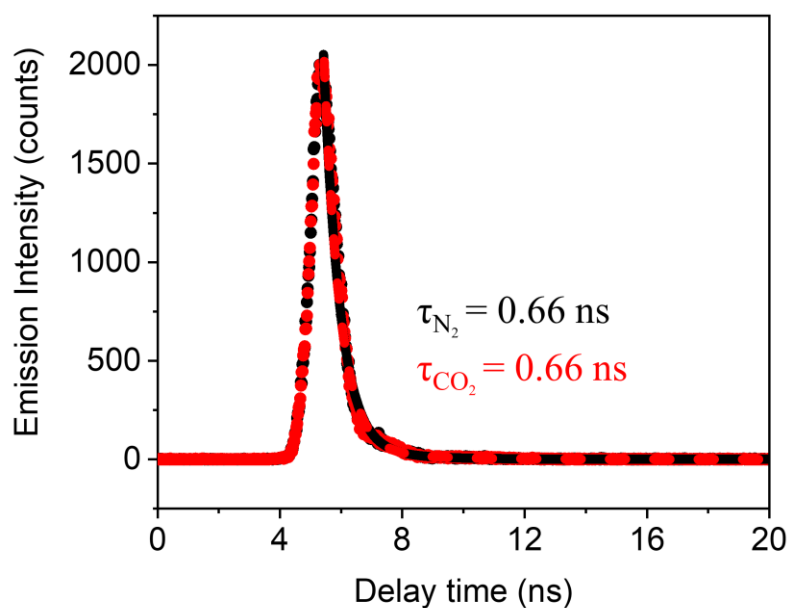

**Supplementary Figure 73. Emission delay.** Emission delay ( $\lambda_{exc} = 472$  nm,  $\lambda_{em} = 607$  nm) of 50  $\mu$ M PS **6** in 2 mL DMF in a quartz cuvette (10-mm path length) at 298 K under N<sub>2</sub> (black) and CO<sub>2</sub> (red).

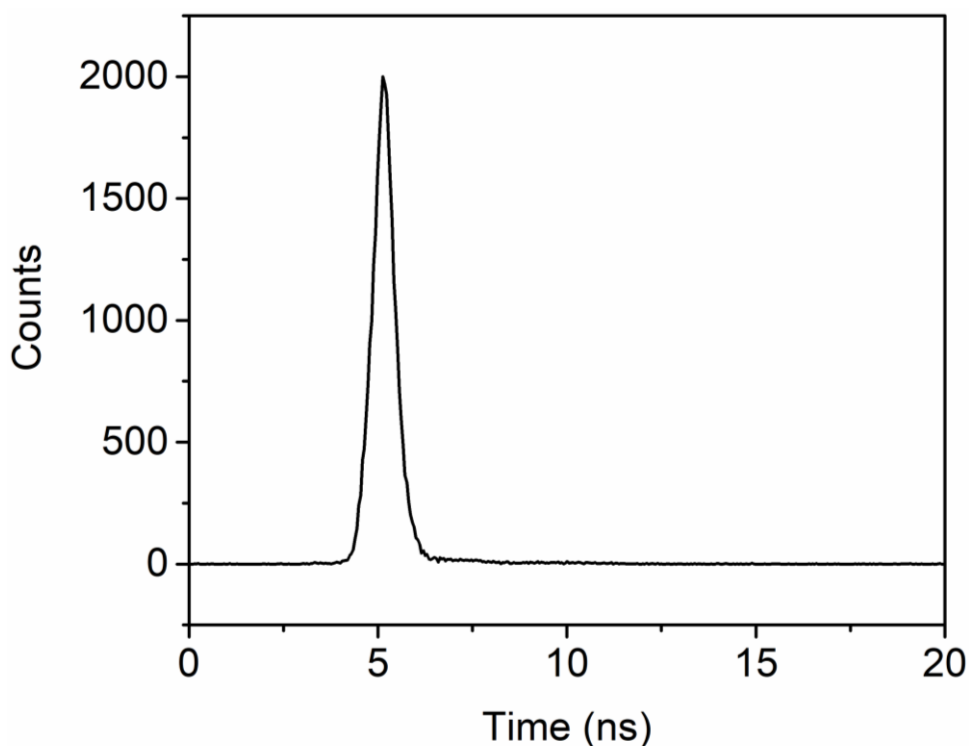

**Supplementary Figure 74. Emission delay.** Emission delay of the picosecond pulsed diode laser ( $\lambda = 472$  nm). IRF was measured using silicon oxide (30% in H<sub>2</sub>O) in a quartz cuvette (10-mm path length) at 298 K.

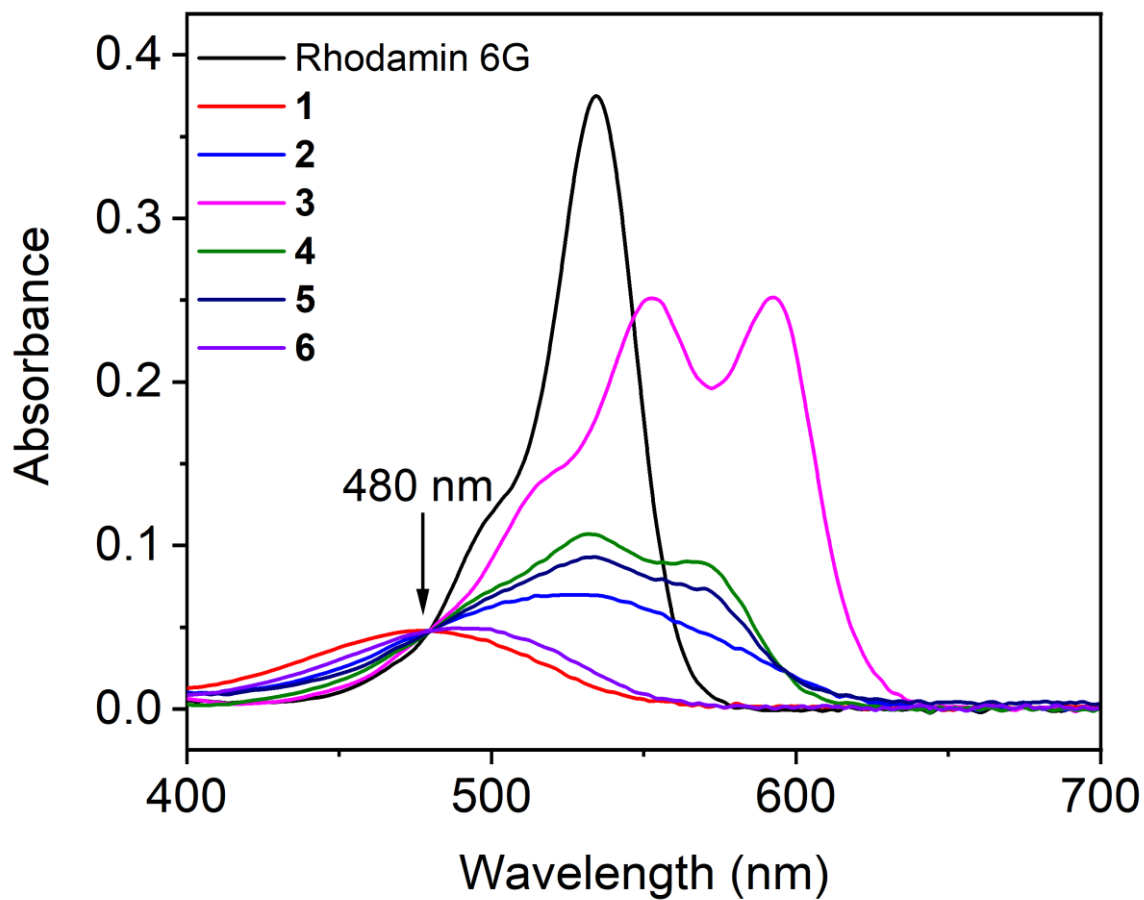

**Supplementary Figure 75. UV-vis spectra.** Absorption spectra of PS 1–6 and Rhodamin 6G in DMF in a quartz cuvette (10–mm path length) at 298 K. The spectra of all samples were adjusted to have the same absorbance at 480 nm for fluorescence quantum yield determination.

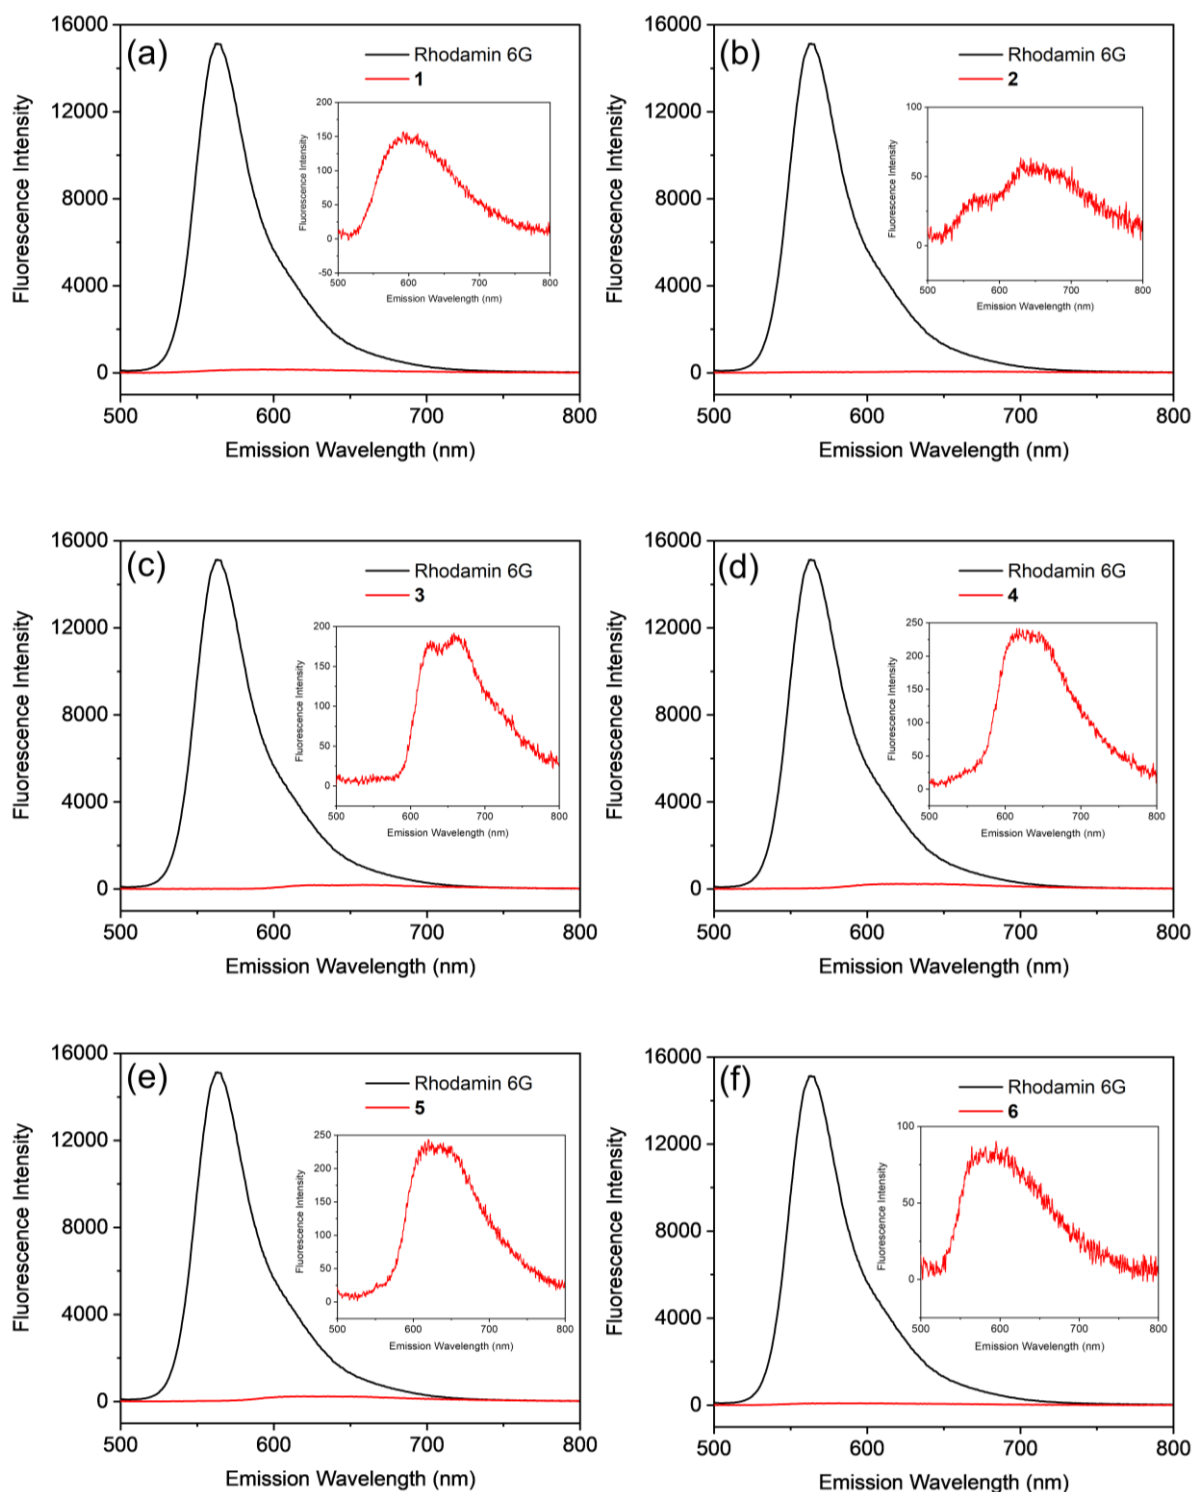

**Supplementary Figure 76. Emission spectra.** Emission spectra ( $\lambda_{\text{exc}} = 480 \text{ nm}$ ) of Rhodamin 6G and (a) 1; (b) 2; (c) 3; (d) 4; (e) 5; and (f) 6 at 298 K in DMF in a quartz cuvette (10-mm path length) under  $\text{N}_2$ . The same samples were used as supplementary Figure 75. The area of each peak was integrated for fluorescence quantum yield determination.

**Supplementary Table 1. Thermodynamic driving force for electron transfer of PSs 1–6.**

| PS | $E_{\text{red}}/\text{V}$ | $E_{\text{ox}}/\text{V}$ | $E_{0,0}/\text{eV}$ | $E_{\text{red}}^*/\text{V}$ | $E_{\text{ox}}^*/\text{V}$ | $\Delta G / \text{eV}$ |
|----|---------------------------|--------------------------|---------------------|-----------------------------|----------------------------|------------------------|
| 1  | -0.96, -1.59              | 1.32                     | 2.30                | 0.71                        | -0.98                      | -0.38                  |
| 2  | -1.10, -1.70              | 0.82                     | 2.09                | 0.39                        | -1.27                      | -0.06                  |
| 3  | -1.15, -1.64              | 0.73                     | 2.03                | 0.39                        | -1.30                      | -0.06                  |
| 4  | -0.84, -1.44              | 0.81                     | 2.11                | 0.67                        | -1.30                      | -0.34                  |
| 5  | -0.68, -1.19              | 0.91                     | 2.10                | 0.91                        | -1.19                      | -0.58                  |
| 6  | -0.86, -1.30              | 1.40                     | 2.26                | 0.96                        | -0.86                      | -0.63                  |

$E_{0,0}$  values were obtained from the intersection of the normalized absorption and emission spectra of the fluorophore in DMF solution and converted to eV.<sup>2</sup> The ground state redox potentials ( $E_{\text{ox}}$  and  $E_{\text{red}}$ ) were measured by electrochemical methods (CVs). The excited state redox potentials were obtained as follows: ESOP (Excited State Oxidation Potential) =  $E_{\text{ox}}(\text{PS}^*) = E_{\text{ox}} - E_{0,0}$ ; ESRP (Excited State Reduction Potential) =  $E_{\text{red}}(\text{PS}^*) = E_{\text{red}} + E_{0,0}$ . The thermodynamic driving force for electron transfer was calculated from Rehm-Weller equation: the difference between reduction potential of excited state of photosensitizer and oxidation potential of BIH as sacrificial reagent. ( $\Delta G = E^0_{(D+D)} - E^0_{(A/A-)} - E_{0,0} - e^2/\epsilon d$ ). The last term which represents the columbic attraction energy was neglected because of small contribution to the overall energy. Therefore, the equation was simplified to  $\Delta G = E_{\text{ox}}(\text{BIH}) - E_{\text{red}}^*(\text{CuPP})$  where  $E_{\text{ox}}(\text{BIH})$  was + 0.33 V (vs SCE). Potentials are given versus SCE.

**Supplementary Table 2. Data for photocatalytic CO<sub>2</sub> reduction.**

| PS | TON <sub>Fe</sub> <sup>a</sup> | Yield rate of CO <sup>a</sup><br>( $\mu\text{mol}/\text{h}$ ) | TON <sub>PS</sub> <sup>b</sup> | Yield rate of CO <sup>b</sup><br>( $\mu\text{mol}/\text{h}$ ) |
|----|--------------------------------|---------------------------------------------------------------|--------------------------------|---------------------------------------------------------------|
| 1  | 2395 ± 228                     | 0.15 ± 0.01                                                   | 2011 ± 257                     | 0.70 ± 0.09                                                   |
| 2  | 2738 ± 190                     | 0.17 ± 0.01                                                   | 482 ± 76                       | 0.17 ± 0.03                                                   |
| 3  | 3551 ± 501                     | 0.22 ± 0.03                                                   | 1523 ± 126                     | 0.53 ± 0.04                                                   |
| 4  | 8360 ± 449                     | 0.52 ± 0.03                                                   | 2849 ± 161                     | 0.99 ± 0.06                                                   |
| 5  | 21616 ± 2351                   | 1.35 ± 0.15                                                   | 6012 ± 606                     | 2.13 ± 0.14                                                   |
| 6  | 907 ± 154                      | 0.06 ± 0.01                                                   | 1183 ± 78                      | 0.41 ± 0.03                                                   |

<sup>a</sup> 60 mM BIH, 0.6  $\mu\text{M}$  FeTDHPP, and 20  $\mu\text{M}$  PS,  $\lambda > 400$  nm, TON<sub>Fe</sub> and yield rate of CO calculated in 48 h. <sup>b</sup> 60 mM BIH, 20  $\mu\text{M}$  FeTDHPP and 5  $\mu\text{M}$  PS,  $\lambda > 400$  nm, TON<sub>PS</sub> and yield rate of CO calculated in 72 h. Error bars denote standard deviations, based on at least three separated runs.

**Supplementary Table 3. Data for photocatalytic CO<sub>2</sub> reduction.** Systems containing the same concentration of **5** and FeTDHPP with 60 mM BIH in 5.0 mL CO<sub>2</sub>-saturated DMF under irradiation with white LEDs ( $\lambda > 400$  nm, 100 mW/cm<sup>2</sup>) at 298 K. The error denotes standard deviation, based on 3 separated runs.

| [PS]/[FeTDHPP] ( $\mu\text{M}$ ) | CO ( $\mu\text{mol}$ ) | TON        | Sel <sub>CO</sub> (%) |
|----------------------------------|------------------------|------------|-----------------------|
| 0.5                              | 7.9 ± 0.6              | 3174 ± 245 | 99.1                  |
| 1                                | 18.0 ± 1.3             | 3587 ± 260 | 99.6                  |
| 2                                | 38.2 ± 1.4             | 3817 ± 136 | 99.9                  |
| 5                                | 124.4 ± 8.2            | 4978 ± 326 | 99.9                  |
| 10                               | 201.4                  | 4028       | 99.9                  |



**Supplementary Table 4.** The performance of photocatalytic CO<sub>2</sub> reduction to CO with organic photosensitizers in noble-metal-free systems in the literature.

| PS                                                        | Catalyst                                                           | Electron donor  | Solvent                                | TON <sub>CO</sub> by Cat. | TON <sub>CO</sub> by PS | Sel <sub>CO</sub> (%) | Light source                                  | Ref       |
|-----------------------------------------------------------|--------------------------------------------------------------------|-----------------|----------------------------------------|---------------------------|-------------------------|-----------------------|-----------------------------------------------|-----------|
| 5<br>(20 μM)                                              | FeTDHPP<br>(0.6 μM)                                                | BIH<br>(60 mM)  | DMF                                    | 21616                     | 646                     | >99.9                 | visible light irradiation<br>(λ > 400 nm)     | This work |
| 5<br>(5 μM)                                               | FeTDHPP<br>(20 μM)                                                 | BIH<br>(60 mM)  | DMF                                    | 1539                      | 6156                    | > 99.9                | visible light irradiation<br>(λ > 400 nm)     | This work |
| 5<br>(5 μM)                                               | FeTDHPP<br>(5 μM)                                                  | BIH<br>(60 mM)  | DMF                                    | 5258                      | 5258                    | > 99.9                | visible light irradiation<br>(λ > 400 nm)     | This work |
| Purpurin<br>(0.2 mM)                                      | Fe- <i>p</i> -TMA<br>(2 μM)                                        | TEA<br>(50 mM)  | MeCN/H <sub>2</sub> O<br>(1:9, v/v)    | 60                        | 0.6                     | 95.0                  | visible light irradiation<br>(λ > 420 nm)     | 3         |
| Purpurin<br>(0.4 mM)                                      | Fe- <i>p</i> -TMA<br>(2 μM)                                        | TEA<br>(50 mM)  | MeCN/H <sub>2</sub> O<br>(1:9, v/v)    | 71                        | 0.355                   | 95.0                  | visible light irradiation<br>(λ > 420 nm)     | 3         |
| Purpurin<br>(2 mM)                                        | [Co(qpy)(H <sub>2</sub> O) <sub>2</sub> ] <sup>2+</sup><br>(5 μM)  | BIH<br>(100 mM) | DMF                                    | 790                       | 1.975                   | 90.0                  | blue LED<br>(λ = 460 nm)                      | 4         |
| Purpurin<br>(0.02 mM)                                     | [Fe(qpy)(H <sub>2</sub> O) <sub>2</sub> ] <sup>2+</sup><br>(5 μM)  | BIH<br>(100 mM) | DMF                                    | 1365                      | 341.3                   | 92.0                  | blue LED<br>(λ = 460 nm)                      | 4         |
| Purpurin<br>(0.02 mM)                                     | [Fe(qpy)(H <sub>2</sub> O) <sub>2</sub> ] <sup>2+</sup><br>(50 μM) | BIH<br>(100 mM) | DMF                                    | 520                       | 1300                    | 97.0                  | blue LED<br>(λ = 460 nm)                      | 4         |
| Purpurin<br>(0.05 mM)                                     | [Fe(dqtpy)(H <sub>2</sub> O)] <sup>2+</sup><br>(50 μM)             | BIH<br>(100 mM) | DMF                                    | 544                       | 544                     | 99.3                  | blue LED<br>(λ = 460 nm)                      | 5         |
| 4CzIPN<br>(0.05 mM)                                       | FeTotpy<br>(10 μM)                                                 | TEA<br>(280 mM) | DMF/H <sub>2</sub> O<br>(3:2, v/v)     | 2250                      | 450                     | 99.3                  | visible light irradiation<br>(λ = 420–650 nm) | 6         |
| 4CzIPN<br>(0.1 mM)                                        | Fe(Ntpy) <sub>2</sub><br>(10 μM)                                   | TEA<br>(280mM)  | DMF/H <sub>2</sub> O<br>(3:2, v/v)     | 6320                      | 632                     | 99.4                  | visible light irradiation<br>(λ = 420–650 nm) | 7         |
| 4CzIPN<br>(0.05 mM)                                       | Fe <sub>6</sub> L <sub>6</sub><br>(L=Phdtpy)<br>(4 μM)             | TEA<br>(280mM)  | DMF/H <sub>2</sub> O<br>(3:2, v/v)     | 2493<br>(per Fe)          | 1196                    | 99.6                  | visible light irradiation<br>(λ = 420–650 nm) | 8         |
| 9CNA<br>(0.2 mM)                                          | FeTDHPP<br>(2 μM)                                                  | TEA<br>(360mM)  | MeCN                                   | 60                        | 0.6                     | 100.0                 | Xe lamp<br>(λ > 400 nm)                       | 9         |
| 3,7-di(4-biphenyl)-1-naphthalene-10-phenoxazine<br>(1 mM) | Fe- <i>p</i> -TMA<br>(10 μM)                                       | TEA             | DMF                                    | 140                       | 1.4                     | 73                    | visible light irradiation<br>(λ > 435 nm)     | 10        |
| phenazine<br>(5mM)                                        | [Co(cyclam)(Cl) <sub>2</sub> ] <sup>+</sup><br>(10mM)              | TEA             | TEA-<br>MeOH-<br>MeCN<br>(1:1:2 v/v/v) | 0.34                      | 0.68                    | 7.1                   | UV irradiation<br>(λ > 290 nm)                | 11        |
| 2-ethylphenazine<br>(5 mM)                                | [Co(cyclam)(Cl) <sub>2</sub> ] <sup>+</sup><br>(10mM)              | TEA             | TEA-<br>MeOH-<br>MeCN<br>(1:1:2 v/v/v) | 0.32                      | 0.64                    | 5.4                   | UV irradiation<br>(λ > 290 nm)                | 11        |
| <i>p</i> -terphenyl<br>(3 mM)                             | CoTPP<br>(0.05 mM)                                                 | TEA             | MeCN<br>5% TEA                         | 62                        | 1.03                    | 66                    | Xe lamp<br>(λ < 300 nm)                       | 12        |
| <i>p</i> -terphenyl<br>(3 mM)                             | FeTPP<br>(0.05 mM)                                                 | TEA             | MeCN<br>5% TEA                         | 42                        | 0.7                     | 38                    | Xe lamp<br>(λ < 300 nm)                       | 12        |

**Supplementary Table 4 (continued).** The performance of photocatalytic CO<sub>2</sub> reduction to CO with organic photosensitizers in noble-metal-free systems in the literature.

| PS                    | Catalyst                            | Electron donor | Solvent                      | TON <sub>CO</sub> by Cat. | TON <sub>CO</sub> by PS | Sel <sub>CO</sub> (%) | Light source                | Ref |
|-----------------------|-------------------------------------|----------------|------------------------------|---------------------------|-------------------------|-----------------------|-----------------------------|-----|
| p-terphenyl (2 mM)    | [Co(cyclam)] <sup>2+</sup> (1.7 mM) | TEA            | TEA-MeOH-MeCN (1:1:4 v/v/v)  | 4.5                       | 3.83                    | 58                    | UV irradiation (λ > 290 nm) | 13  |
| p-terphenyl (2 mM)    | [Co(MC-1)] <sup>2+</sup> (1.7 mM)   | TEA            | TEA-MeOH-MeCN (1:1:4 v/v/v)  | 5.5                       | 4.68                    | 54                    | UV irradiation (λ > 290 nm) | 13  |
| p-terphenyl (2 mM)    | [Co(MC-2)] <sup>2+</sup> (1.7 mM)   | TEA            | TEA-MeOH-MeCN (1:1:4 v/v/v)  | 5.3                       | 4.51                    | 52                    | UV irradiation (λ > 290 nm) | 13  |
| p-terphenyl (2 mM)    | [Co(MC-3)] <sup>2+</sup> (1.7 mM)   | TEA            | TEA-MeOH-MeCN (1:1:4 v/v/v)  | 4.9                       | 4.17                    | 53                    | UV irradiation (λ > 290 nm) | 13  |
| p-terphenyl (2 mM)    | [Co(MC-4)] <sup>2+</sup> (1.7 mM)   | TEA            | TEA-MeOH-MeCN (1:1:4 v/v/v)  | 2.0                       | 1.70                    | 53                    | UV irradiation (λ > 290 nm) | 13  |
| p-terphenyl (2 mM)    | [Co(MC-5)] <sup>2+</sup> (1.7 mM)   | TEA            | TEA-MeOH-MeCN (1:1:4 v/v/v)  | 1.0                       | 0.85                    | 43                    | UV irradiation (λ > 290 nm) | 13  |
| p-terphenyl (2 mM)    | [Co(MC-6)] <sup>2+</sup> (1.7 mM)   | TEA            | TEA-MeOH-MeCN (1:1:4 v/v/v)  | 27                        | 22.95                   | 81                    | UV irradiation (λ > 290 nm) | 13  |
| p-terphenyl (0.05 mM) | [Co(cyclam)] <sup>2+</sup> (1.7 mM) | TEOA           | TEOA-MeOH-MeCN (1:1:4 v/v/v) | 9.6                       | 326.40                  | 55                    | UV irradiation (λ > 290 nm) | 14  |

**Supplementary Table 5.** The performance of photocatalytic CO<sub>2</sub> reduction with PS **5** in our study.

| Photosensitizer | Catalyst            | Electron donor | TON <sub>co</sub><br>by Cat. | TON <sub>co</sub><br>By PS | Sel <sub>co</sub> (%) |
|-----------------|---------------------|----------------|------------------------------|----------------------------|-----------------------|
| 5 (20 μM)       | FeTDHPP<br>(0.5 μM) | BIH (60 mM)    | 19158                        | 479                        | > 99.9                |
| 5 (20 μM)       | FeTDHPP<br>(0.6 μM) | BIH (60 mM)    | 21616                        | 646                        | > 99.9                |
| 5 (20 μM)       | FeTDHPP<br>(1 μM)   | BIH (60 mM)    | 17020                        | 851                        | > 99.9                |
| 5 (20 μM)       | FeTDHPP<br>(2 μM)   | BIH (60 mM)    | 11250                        | 1125                       | > 99.9                |
| 5 (20 μM)       | FeTDHPP<br>(10 μM)  | BIH (60 mM)    | 3942                         | 1971                       | > 99.9                |
| 5 (20 μM)       | FeTDHPP<br>(20 μM)  | BIH (60 mM)    | 2134                         | 2134                       | > 99.9                |
| 5 (20 μM)       | FeTDHPP<br>(50 μM)  | BIH (60 mM)    | 891                          | 2227                       | > 99.9                |
| 5 (15 μM)       | FeTDHPP<br>(2 μM)   | BIH (60 mM)    | 8772                         | 1170                       | > 99.9                |
| 5 (10 μM)       | FeTDHPP<br>(2 μM)   | BIH (60 mM)    | 5593                         | 1119                       | > 99.9                |
| 5 (10 μM)       | FeTDHPP<br>(5 μM)   | BIH (60 mM)    | 4128                         | 2064                       | > 99.9                |
| 5 (10 μM)       | FeTDHPP<br>(10 μM)  | BIH (60 mM)    | 4028                         | 4028                       | > 99.9                |
| 5 (10 μM)       | FeTDHPP<br>(20 μM)  | BIH (60 mM)    | 2325                         | 4649                       | > 99.9                |
| 5 (5 μM)        | FeTDHPP<br>(2 μM)   | BIH (60 mM)    | 8780                         | 3512                       | > 99.9                |
| 5 (5 μM)        | FeTDHPP<br>(5 μM)   | BIH (60 mM)    | 5258                         | 5258                       | > 99.9                |
| 5 (5 μM)        | FeTDHPP<br>(10 μM)  | BIH (60 mM)    | 2576                         | 5152                       | > 99.9                |
| 5 (5 μM)        | FeTDHPP<br>(20 μM)  | BIH (60 mM)    | 1539                         | 6156                       | > 99.9                |

## Supplementary References

1. Klaper, M., Wessig, P. & Linker, T. Base catalysed decomposition of anthracene endoperoxide. *Chem. Commun.* **52**, 1210-1213, (2016).
2. Mejía, E. *et al.* A noble-metal-free system for photocatalytic hydrogen production from water. *Chem. Eur. J.* **19**, 15972-15978, (2013).
3. Rao, H., Bonin, J. & Robert, M. Visible-light homogeneous photocatalytic conversion of CO<sub>2</sub> into CO in aqueous solutions with an iron catalyst. *ChemSusChem* **10**, 4447-4450, (2017).
4. Guo, Z. *et al.* Highly efficient and selective photocatalytic CO<sub>2</sub> reduction by iron and cobalt quaterpyridine complexes. *J. Am. Chem. Soc.* **138**, 9413-9416, (2016).
5. Chen, L. *et al.* A molecular noble metal-free system for efficient visible light-driven reduction of CO<sub>2</sub> to CO. *Dalton Trans.* **48**, 9596-9602, (2019).
6. Wang, Y., Gao, X.-W., Li, J. & Chao, D. Merging an organic TADF photosensitizer and a simple terpyridine-Fe(III) complex for photocatalytic CO<sub>2</sub> reduction. *Chem. Commun.* **56**, 12170-12173, (2020).
7. Wang, Y., Liu, T., Chen, L. & Chao, D. Water-assisted highly efficient photocatalytic reduction of CO<sub>2</sub> to CO with noble metal-free bis(terpyridine)iron(II) complexes and an organic photosensitizer. *Inorg. Chem.* **60**, 5590-5597, (2021).
8. Wang, Y., Chen, L., Liu, T. & Chao, D. Coordination-driven discrete metallo-supramolecular assembly for rapid and selective photochemical CO<sub>2</sub> reduction in aqueous solution. *Dalton Trans.* **50**, 6273-6280, (2021).
9. Bonin, J., Robert, M. & Routier, M. Selective and efficient photocatalytic CO<sub>2</sub> reduction to CO using visible light and an Iron-based homogeneous catalyst. *J. Am. Chem. Soc.* **136**, 16768-16771, (2014).
10. Rao, H., Lim, C.-H., Bonin, J., Miyake, G. M. & Robert, M. Visible-light-driven conversion of CO<sub>2</sub> to CH<sub>4</sub> with an organic sensitizer and an iron porphyrin catalyst. *J. Am. Chem. Soc.* **140**, 17830-17834, (2018).
11. Ogata, T. *et al.* Phenazine-photosensitized reduction of CO<sub>2</sub> mediated by a cobalt-cyclam complex through electron and hydrogen transfer. *J. Phys. Chem.* **99**, 11916-11922, (1995).
12. Dhanasekaran, T., Grodkowski, J., Neta, P., Hambright, P. & Fujita, E. p-terphenyl-sensitized photoreduction of CO<sub>2</sub> with cobalt and iron porphyrins. Interaction between CO and reduced metalloporphyrins. *J. Phys. Chem. A* **103**, 7742-7748, (1999).
13. Matsuoka, S. *et al.* Efficient and selective electron mediation of cobalt complexes with cyclam and related macrocycles in the p-terphenyl-catalyzed photoreduction of carbon dioxide. *J. Am. Chem. Soc.* **115**, 601-609, (1993).
14. Matsuoka, S., Yamamoto, K., Pac, C. & Yanagida, S. Enhanced p-terphenyl-catalyzed photoreduction of CO<sub>2</sub> to CO through the mediation of Co(III)-cyclam complex. *Chem. Lett.* **20**, 2099-2100, (1991).
